# Supplementary material for: Informed consent, shared-decision making and a reasonable patient’s wishes based on a cross-sectional, national survey in the USA using a hypothetical scenario
Source: PubMed Central journal article supplement — BMJ Open. 2019 Jul 30;9(7):e028957. doi: 10.1136/bmjopen-2019-028957 (PMC6678025; doi:10.1136/bmjopen-2019-028957), 2019-07-30
Supplement: bmjopen-2019-028957supp004.pdf [file bmjopen-2019-028957supp004.pdf]

**Table 1. Comparative demographics of targeted groups**

| Demographic measure       | Student Nurses<br>(n = 77) | HPESS Community<br>(n = 63) | p-Value |
|---------------------------|----------------------------|-----------------------------|---------|
| Under 35 years of age     | 76.7%                      | 3.2%                        | 0.0000  |
| Female                    | 77.9%                      | 69.8%                       | 0.2755  |
| High school graduate      | 33.8%                      | 1.6%                        | 0.0000  |
| College graduate          | 64.9%                      | 4.8%                        | 0.0000  |
| Advanced degree           | 1.3%                       | 90.5%                       | 0.0000  |
| White or Caucasian        | 50.6%                      | 84.1%                       | 0.0000  |
| Black or African American | 15.6%                      | 3.2%                        | 0.0151  |
| Hispanic or Latino        | 26.0%                      | 1.6%                        | 0.0001  |
| Asian                     | 3.9%                       | 6.3%                        | 0.5161  |
| Have worked in a hospital | 35.1%                      | 85.7%                       | 0.0000  |

**Under 35 years of age**

. prtesti 77 .767 63 .032

Two-sample test of proportions

x: Number of obs = 77

y: Number of obs = 63

| Variable                 | Mean      | Std. Err.              | z    | P> z               | [95% Conf. Interval] |
|--------------------------|-----------|------------------------|------|--------------------|----------------------|
| x                        | .767      | .0481759               |      |                    | .6725769 .8614231    |
| y                        | .032      | .0221739               |      |                    | -.0114601 .0754601   |
| diff                     | .735      | .053034                |      |                    | .6310553 .8389447    |
|                          | under Ho: | .084248                | 8.72 | 0.000              |                      |
| diff = prop(x) - prop(y) |           |                        |      |                    | z = 8.7242           |
| Ho: diff = 0             |           |                        |      |                    |                      |
| Ha: diff < 0             |           | Ha: diff != 0          |      | Ha: diff > 0       |                      |
| Pr(Z < z) = 1.0000       |           | Pr( Z  >  z ) = 0.0000 |      | Pr(Z > z) = 0.0000 |                      |

**Female.**

. prtesti 77 .779 63 .698

Two-sample test of proportions

x: Number of obs = 77

y: Number of obs = 63

| Variable                 | Mean      | Std. Err.              | z    | P> z               | [95% Conf. Interval] |
|--------------------------|-----------|------------------------|------|--------------------|----------------------|
| x                        | .779      | .0472846               |      |                    | .6863239 .8716761    |
| y                        | .698      | .0578443               |      |                    | .5846272 .8113728    |
| diff                     | .081      | .0747114               |      |                    | -.0654317 .2274317   |
|                          | under Ho: | .0742776               | 1.09 | 0.275              |                      |
| diff = prop(x) - prop(y) |           |                        |      |                    | z = 1.0905           |
| Ho: diff = 0             |           |                        |      |                    |                      |
| Ha: diff < 0             |           | Ha: diff != 0          |      | Ha: diff > 0       |                      |
| Pr(Z < z) = 0.8623       |           | Pr( Z  >  z ) = 0.2755 |      | Pr(Z > z) = 0.1377 |                      |

**High school graduate**

. prtesti 77 .338 63 .016

Two-sample test of proportions

x: Number of obs = 77

y: Number of obs = 63

| Variable | Mean      | Std. Err. | z    | P> z  | [95% Conf. Interval] |
|----------|-----------|-----------|------|-------|----------------------|
| x        | .338      | .0539066  |      |       | .232345 .443655      |
| y        | .016      | .0158084  |      |       | -.0149838 .0469838   |
| diff     | .322      | .0561767  |      |       | .2118956 .4321044    |
|          | under Ho: | .0670578  | 4.80 | 0.000 |                      |

diff = prop(x) - prop(y) z = 4.8018  
 Ho: diff = 0

Ha: diff < 0  
 Pr(Z < z) = 1.0000

Ha: diff != 0  
 Pr(|Z| > |z|) = 0.0000

Ha: diff > 0  
 Pr(Z > z) = 0.0000

.

.

**College graduate**

. prtesti 77 .649 63 .048

Two-sample test of proportions

x: Number of obs = 77

y: Number of obs = 63

| Variable | Mean      | Std. Err. | z    | P> z  | [95% Conf. Interval] |
|----------|-----------|-----------|------|-------|----------------------|
| x        | .649      | .0543914  |      |       | .5423947 .7556053    |
| y        | .048      | .026932   |      |       | -.0047858 .1007858   |
| diff     | .601      | .060694   |      |       | .4820419 .7199581    |
|          | under Ho: | .0823973  | 7.29 | 0.000 |                      |

diff = prop(x) - prop(y) z = 7.2939  
 Ho: diff = 0

Ha: diff < 0  
 Pr(Z < z) = 1.0000

Ha: diff != 0  
 Pr(|Z| > |z|) = 0.0000

Ha: diff > 0  
 Pr(Z > z) = 0.0000

.

.

**Advanced degree**

. prtesti 77 .013 63 .905

Two-sample test of proportions

x: Number of obs = 77

y: Number of obs = 63

| Variable | Mean      | Std. Err. | z      | P> z  | [95% Conf. Interval] |
|----------|-----------|-----------|--------|-------|----------------------|
| x        | .013      | .0129088  |        |       | -.0123007 .0383007   |
| y        | .905      | .0369416  |        |       | .8325958 .9774042    |
| diff     | -.892     | .0391321  |        |       | -.9686974 -.8153026  |
|          | under Ho: | .0836872  | -10.66 | 0.000 |                      |

diff = prop(x) - prop(y) z = -10.6587  
 Ho: diff = 0

Ha: diff < 0  
 Pr(Z < z) = 0.0000

Ha: diff != 0  
 Pr(|Z| > |z|) = 0.0000

Ha: diff > 0  
 Pr(Z > z) = 1.0000

.

.

.

.

. **White or Caucasian**

. . prtesti 77 .506 63 .841

Two-sample test of proportions

x: Number of obs = 77

y: Number of obs = 63

| Variable | Mean      | Std. Err. | z     | P> z  | [95% Conf. Interval] |
|----------|-----------|-----------|-------|-------|----------------------|
| x        | .506      | .0569762  |       |       | .3943287 .6176713    |
| y        | .841      | .0460709  |       |       | .7507028 .9312972    |
| diff     | -.335     | .0732722  |       |       | -.4786108 -.1913892  |
|          | under Ho: | .0806592  | -4.15 | 0.000 |                      |

diff = prop(x) - prop(y) z = -4.1533  
Ho: diff = 0

Ha: diff < 0

Ha: diff != 0

Ha: diff > 0

Pr(Z < z) = 0.0000

Pr(|Z| > |z|) = 0.0000

Pr(Z > z) = 1.0000

. . **Black or African American**

. prtesti 77 .156 63 .032

Two-sample test of proportions

x: Number of obs = 77

y: Number of obs = 63

| Variable | Mean      | Std. Err. | z    | P> z  | [95% Conf. Interval] |
|----------|-----------|-----------|------|-------|----------------------|
| x        | .156      | .0413512  |      |       | .0749531 .2370469    |
| y        | .032      | .0221739  |      |       | -.0114601 .0754601   |
| diff     | .124      | .0469213  |      |       | .032036 .215964      |
|          | under Ho: | .05101    | 2.43 | 0.015 |                      |

diff = prop(x) - prop(y) z = 2.4309  
Ho: diff = 0

Ha: diff < 0

Ha: diff != 0

Ha: diff > 0

Pr(Z < z) = 0.9925

Pr(|Z| > |z|) = 0.0151

Pr(Z > z) = 0.0075

. **Hispanic or Latino**

. prtesti 77 .260 63 .016

Two-sample test of proportions

x: Number of obs = 77

y: Number of obs = 63

| Variable | Mean      | Std. Err. | z    | P> z  | [95% Conf. Interval] |
|----------|-----------|-----------|------|-------|----------------------|
| x        | .26       | .049987   |      |       | .1620273 .3579727    |
| y        | .016      | .0158084  |      |       | -.0149838 .0469838   |
| diff     | .244      | .0524272  |      |       | .1412447 .3467553    |
|          | under Ho: | .0606934  | 4.02 | 0.000 |                      |

diff = prop(x) - prop(y) z = 4.0202  
Ho: diff = 0

Ha: diff < 0

Ha: diff != 0

Ha: diff > 0

Pr(Z < z) = 1.0000

Pr(|Z| > |z|) = 0.0001

Pr(Z > z) = 0.0000

.  
**. Asian**

. prtesti 77 .039 63 .063

Two-sample test of proportions

x: Number of obs = 77

y: Number of obs = 63

| Variable | Mean | Std. Err. | z | P> z | [95% Conf. Interval] |
|----------|------|-----------|---|------|----------------------|
| x        | .039 | .0220622  |   |      | -.0042411 .0822411   |
| y        | .063 | .0306105  |   |      | .0030046 .1229954    |

|      |           |          |       |       |                    |
|------|-----------|----------|-------|-------|--------------------|
| diff | -.024     | .0377325 |       |       | -.0979543 .0499543 |
|      | under Ho: | .0369548 | -0.65 | 0.516 |                    |

diff = prop(x) - prop(y) z = -0.6494  
 Ho: diff = 0

Ha: diff < 0  
 Pr(Z < z) = 0.2580

Ha: diff != 0  
 Pr(|Z| > |z|) = 0.5161

Ha: diff > 0  
 Pr(Z > z) = 0.7420

.  
**. Have worked in a hospital**

. prtesti 77 .351 63 .857

Two-sample test of proportions

x: Number of obs = 77

y: Number of obs = 63

| Variable | Mean | Std. Err. | z | P> z | [95% Conf. Interval] |
|----------|------|-----------|---|------|----------------------|
| x        | .351 | .0543914  |   |      | .2443947 .4576053    |
| y        | .857 | .044105   |   |      | .7705557 .9434443    |

|      |           |          |       |       |                   |
|------|-----------|----------|-------|-------|-------------------|
| diff | -.506     | .0700263 |       |       | -.643249 -.368751 |
|      | under Ho: | .0838824 | -6.03 | 0.000 |                   |

diff = prop(x) - prop(y) z = -6.0323  
 Ho: diff = 0

Ha: diff < 0  
 Pr(Z < z) = 0.0000

Ha: diff != 0  
 Pr(|Z| > |z|) = 0.0000

Ha: diff > 0  
 Pr(Z > z) = 1.0000
