# Supplementary material for: Informed consent, shared-decision making and a reasonable patient’s wishes based on a cross-sectional, national survey in the USA using a hypothetical scenario
Source: PubMed Central journal article supplement — BMJ Open. 2019 Jul 30;9(7):e028957. doi: 10.1136/bmjopen-2019-028957 (PMC6678025; doi:10.1136/bmjopen-2019-028957), 2019-07-30
Supplement: bmjopen-2019-028957supp005.pdf [file bmjopen-2019-028957supp005.pdf]

## Nurse-Student Statistics Report

### Summary

- Question – For each of the questions, 1-10, is there a difference in the average response by age?

Answer – NO, there are no significant differences among age groups in their responses to any of the 10 questions.

- Question – For each of the questions, 1-10, is there a difference in the average response by gender?

Answer – NO, there are no significant differences between the genders in their responses to any of the 10 questions.

- Question – For each of the questions, 1-10, is there a difference in the average response by level of education

Answer – NO, there are no significant differences among the education levels in their responses to any of the 10 questions.

- Question: For each of the questions, is there a difference in the average response based upon racer or ethnicity

Answer – YES, for questions 1, 5, and 6,

```
. dunnstest iq1, by(ieth) ma(bh) wrap
K-Wallis probability = 0.0038
```

Dunn's Pairwise Comparison of iq1 by ieth  
(Benjamini-Hochberg)

| Col Mean-<br>Row Mean | 1                   | 2                   | 3                  | 4                  |
|-----------------------|---------------------|---------------------|--------------------|--------------------|
| 2                     | 3.061273<br>0.0110  |                     |                    |                    |
| 3                     | -0.085671<br>0.5176 | -1.871072<br>0.0613 |                    |                    |
| 4                     | -0.166771<br>0.5422 | -2.646096<br>0.0204 | 0.000000<br>0.5000 |                    |
| 7                     | 2.553091<br>0.0178  | -0.755791<br>0.3213 | 1.387066<br>0.1379 | 2.097047<br>0.0450 |

```
False Discovery Rate = 0.05
Reject Ho if p = P(Z <= |z|) <= FDR/2 with stopping rule
```

```
. dunnstest iq5, by(ieth) ma(bh) wrap
K-Wallis probability = 0.0001
```

Dunn's Pairwise Comparison of iq5 by ieth  
(Benjamini-Hochberg)

| Col Mean-<br>Row Mean | 1                   | 2                   | 3                   | 4        |
|-----------------------|---------------------|---------------------|---------------------|----------|
| 2                     | 1.713447<br>0.0866  |                     |                     |          |
| 3                     | 2.264929<br>0.0294  | 0.858920<br>0.2440  |                     |          |
| 4                     | -0.476526<br>0.3521 | -1.710491<br>0.0726 | -2.265841<br>0.0391 |          |
| 7                     | 4.334614            | 1.465931            | 0.247897            | 3.691637 |

```

      | 0.0001    0.1019    0.4021    0.0006
False Discovery Rate = 0.05
Reject Ho if p = P(Z <= |z|) <= FDR/2 with stopping rule

. dunnstest iq6, by(ieth) ma(bh) wrap
Kwallis probability = 0.0245

      Dunn's Pairwise Comparison of iq6 by ieth
      (Benjamini-Hochberg)
Col Mean-|
Row Mean |      1      2      3      4
-----+-----
  2 | 0.459251
    | 0.3589
  3 | -0.624727 -0.785168
    | 0.3326    0.3088
  4 | -1.215526 -1.110396 0.000000
    | 0.2242    0.2224    0.5000
  7 | 2.934536  1.546239  2.055206  3.107180
    | 0.0084    0.1526    0.0664    0.0094

False Discovery Rate = 0.05
Reject Ho if p = P(Z <= |z|) <= FDR/2 with stopping rule

```

- Question – For each of the questions, 1-10, is there a difference in the average response if respondent is or was a hospital worker?

Answer – NO, there are no significant differences among groups, based upon hospital work experience, in their responses to any of the 10 questions.

## Statistics

- Question – For each of the questions, 1-10, is there a difference in the average response by age among those who identified their age group?

```

. dunnstest iq1, by(iage) ma(bh) wrap
Warning: by() values are unlabeled, option nolabel implicit

Kruskal-Wallis equality-of-populations rank test

+-----+
| iage | Obs | Rank Sum |
+-----+
| 3 | 2 | 67.00 |
| 4 | 12 | 402.00 |
| 5 | 14 | 405.50 |
| 6 | 25 | 806.50 |
| 7 | 10 | 335.00 |
+-----+

chi-squared = 0.550 with 4 d.f.
probability = 0.9685

chi-squared with ties = 4.037 with 4 d.f.
probability = 0.4010

```

```

      Dunn's Pairwise Comparison of iq1 by iage
      (Benjamini-Hochberg)
Col Mean-|
Row Mean |      3      4      5      6
-----+-----
  4 | 0.000000

```

```

      |      0.6250
5 |      0.887093  1.704583
      |      0.4688      0.4414
6 |      0.249476  0.522019 -1.459674
      |      0.5736      0.6017      0.2406
7 |      0.000000  0.000000 -1.619603 -0.489962
      |      0.5556      0.5000      0.2633      0.5201

```

False Discovery Rate = 0.05  
 Reject Ho if  $p = P(Z \leq |z|) \leq \text{FDR}/2$  with stopping rule

```
. dunnntest iq2, by(iage) ma(bh) wrap
```

Warning: by() values are unlabeled, option nolabel implicit

Kruskal-Wallis equality-of-populations rank test

```

+-----+
| iage | Obs | Rank Sum |
+-----+-----+
| 3 | 2 | 57.00 |
| 4 | 12 | 320.50 |
| 5 | 14 | 396.50 |
| 6 | 25 | 857.50 |
| 7 | 10 | 384.50 |
+-----+

```

chi-squared = 3.269 with 4 d.f.  
 probability = 0.5139

chi-squared with ties = 4.720 with 4 d.f.  
 probability = 0.3173

Dunn's Pairwise Comparison of iq2 by iage  
 (Benjamini-Hochberg)

| Col Mean- | 3         | 4         | 5         | 6         |
|-----------|-----------|-----------|-----------|-----------|
| 4         | 0.153782  |           |           |           |
|           | 0.4877    |           |           |           |
| 5         | 0.015486  | -0.268804 |           |           |
|           | 0.4938    | 0.4926    |           |           |
| 6         | -0.517415 | -1.417114 | -1.174105 |           |
|           | 0.4320    | 0.2607    | 0.3004    |           |
| 7         | -0.842084 | -1.797699 | -1.603668 | -0.727096 |
|           | 0.3997    | 0.3611    | 0.2720    | 0.3893    |

False Discovery Rate = 0.05  
 Reject Ho if  $p = P(Z \leq |z|) \leq \text{FDR}/2$  with stopping rule

```
. dunnntest iq3, by(iage) ma(bh) wrap
```

Warning: by() values are unlabeled, option nolabel implicit

Kruskal-Wallis equality-of-populations rank test

```

+-----+
| iage | Obs | Rank Sum |
+-----+-----+
| 3 | 2 | 20.00 |
| 4 | 12 | 428.00 |
| 5 | 14 | 405.50 |
| 6 | 25 | 806.00 |
| 7 | 10 | 356.50 |
+-----+

```

chi-squared = 4.146 with 4 d.f.  
 probability = 0.3866

chi-squared with ties = 8.316 with 4 d.f.  
 probability = 0.0807

Dunn's Pairwise Comparison of iq3 by iage  
 (Benjamini-Hochberg)

| Col Mean-<br>Row Mean | 3                   | 4                  | 5                   | 6                   |
|-----------------------|---------------------|--------------------|---------------------|---------------------|
| 4                     | -2.596467<br>0.0471 |                    |                     |                     |
| 5                     | -1.938328<br>0.0657 | 1.316342<br>0.1881 |                     |                     |
| 6                     | -2.338350<br>0.0323 | 0.753882<br>0.2818 | -0.758192<br>0.3202 |                     |
| 7                     | -2.558488<br>0.0263 | 0.003007<br>0.4988 | -1.247607<br>0.1768 | -0.704145<br>0.2674 |

False Discovery Rate = 0.05  
 Reject Ho if  $p = P(Z \leq |z|) \leq \text{FDR}/2$  with stopping rule

. dunnstest iq4, by(iage) ma(bh) wrap

Warning: by() values are unlabeled, option nolabel implicit

Kruskal-Wallis equality-of-populations rank test

| iage | Obs | Rank Sum |
|------|-----|----------|
| 3    | 2   | 52.50    |
| 4    | 12  | 305.00   |
| 5    | 14  | 419.50   |
| 6    | 25  | 854.50   |
| 7    | 10  | 384.50   |

chi-squared = 3.509 with 4 d.f.  
 probability = 0.4765

chi-squared with ties = 5.484 with 4 d.f.  
 probability = 0.2411

Dunn's Pairwise Comparison of iq4 by iage  
 (Benjamini-Hochberg)

| Col Mean-<br>Row Mean | 3                   | 4                   | 5                   | 6                   |
|-----------------------|---------------------|---------------------|---------------------|---------------------|
| 4                     | 0.074414<br>0.4703  |                     |                     |                     |
| 5                     | -0.335113<br>0.4097 | -0.788405<br>0.3587 |                     |                     |
| 6                     | -0.735992<br>0.2886 | -1.701869<br>0.2219 | -0.861331<br>0.3891 |                     |
| 7                     | -1.074190<br>0.3534 | -2.076021<br>0.1895 | -1.397796<br>0.2703 | -0.778325<br>0.3117 |

False Discovery Rate = 0.05  
 Reject Ho if  $p = P(Z \leq |z|) \leq \text{FDR}/2$  with stopping rule

. dunnstest iq5, by(iage) ma(bh) wrap

Warning: by() values are unlabeled, option nolabel implicit

Kruskal-Wallis equality-of-populations rank test

+-----+

```

+-----+
| iage | Obs | Rank Sum |
+-----+
| 3 | 2 | 39.50 |
| 4 | 12 | 326.00 |
| 5 | 14 | 419.50 |
| 6 | 25 | 861.00 |
| 7 | 10 | 370.00 |
+-----+

```

chi-squared = 3.087 with 4 d.f.  
probability = 0.5433

chi-squared with ties = 7.650 with 4 d.f.  
probability = 0.1053

Dunn's Pairwise Comparison of iq5 by iage  
(Benjamini-Hochberg)

```

Col Mean-|
Row Mean |          3          4          5          6
+-----+
 4 | -0.833898
   | 0.2527
   |
 5 | -1.160351 -0.610687
   | 0.2049 0.3008
   |
 6 | -1.716672 -1.778507 -1.151401
   | 0.1075 0.1255 0.1783
   |
 7 | -1.912387 -1.972161 -1.459248 -0.587541
   | 0.1396 0.2430 0.1445 0.2784

```

False Discovery Rate = 0.05  
Reject Ho if  $p = P(Z \leq |z|) \leq \text{FDR}/2$  with stopping rule

. dunntest iq6, by(iage) ma(bh) wrap

Warning: by() values are unlabeled, option nolabel implicit

Kruskal-Wallis equality-of-populations rank test

```

+-----+
| iage | Obs | Rank Sum |
+-----+
| 3 | 2 | 83.00 |
| 4 | 12 | 402.50 |
| 5 | 14 | 380.00 |
| 6 | 25 | 742.50 |
| 7 | 9 | 345.00 |
+-----+

```

chi-squared = 3.125 with 4 d.f.  
probability = 0.5372

chi-squared with ties = 4.632 with 4 d.f.  
probability = 0.3272

Dunn's Pairwise Comparison of iq6 by iage  
(Benjamini-Hochberg)

```

Col Mean-|
Row Mean |          3          4          5          6
+-----+
 4 | 0.703165
   | 0.3012
   |
 5 | 1.281683 1.097642
   | 0.3333 0.3405
   |
 6 | 1.083624 0.738198 -0.516952
   | 0.2785 0.3837 0.3362
   |
 7 | 0.273361 -0.733301 -1.767517 -1.498732
   | 0.3923 0.3310 0.3857 0.3349

```

False Discovery Rate = 0.05

Reject Ho if  $p = P(Z \leq |z|) \leq \text{FDR}/2$  with stopping rule

```
. dunnstest iq7, by(iage) ma(bh) wrap
```

Warning: by() values are unlabeled, option nolabel implicit

Kruskal-Wallis equality-of-populations rank test

```
+-----+
| iage | Obs | Rank Sum |
+-----+-----+
|   3  |  2  |   18.00  |
|   4  | 12  |  342.00  |
|   5  | 14  |  476.00  |
|   6  | 25  |  827.00  |
|   7  | 10  |  353.00  |
+-----+
```

chi-squared = 4.164 with 4 d.f.  
probability = 0.3843

chi-squared with ties = 5.665 with 4 d.f.  
probability = 0.2256

Dunn's Pairwise Comparison of iq7 by iage  
(Benjamini-Hochberg)

| Col Mean- |           |           |           |           |
|-----------|-----------|-----------|-----------|-----------|
| Row Mean  | 3         | 4         | 5         | 6         |
| 4         | -1.624636 |           |           |           |
|           | 0.1303    |           |           |           |
| 5         | -2.104451 | -0.889632 |           |           |
|           | 0.0883    | 0.3114    |           |           |
| 6         | -2.085160 | -0.829861 | 0.175376  |           |
|           | 0.0618    | 0.2904    | 0.4304    |           |
| 7         | -2.160529 | -1.010574 | -0.199794 | -0.377545 |
|           | 0.1537    | 0.3122    | 0.4676    | 0.4411    |

False Discovery Rate = 0.05  
Reject Ho if  $p = P(Z \leq |z|) \leq \text{FDR}/2$  with stopping rule

```
. dunnstest iq8, by(iage) ma(bh) wrap
```

Warning: by() values are unlabeled, option nolabel implicit

Kruskal-Wallis equality-of-populations rank test

```
+-----+
| iage | Obs | Rank Sum |
+-----+-----+
|   3  |  2  |   62.00  |
|   4  | 12  |  319.50  |
|   5  | 14  |  441.00  |
|   6  | 25  |  806.50  |
|   7  | 10  |  387.00  |
+-----+
```

chi-squared = 2.389 with 4 d.f.  
probability = 0.6646

chi-squared with ties = 2.751 with 4 d.f.  
probability = 0.6003

Dunn's Pairwise Comparison of iq8 by iage  
(Benjamini-Hochberg)

| Col Mean- |          |   |   |   |
|-----------|----------|---|---|---|
| Row Mean  | 3        | 4 | 5 | 6 |
| 4         | 0.335334 |   |   |   |
|           | 0.5267   |   |   |   |

```

5 | -0.038721 -0.725439
   | 0.4846    0.4682
6 | -0.100377 -0.939317 -0.133283
   | 0.5111    0.4345    0.5587
7 | -0.581934 -1.650916 -1.018004 -1.007582
   | 0.4672    0.4938    0.7717    0.5228

```

False Discovery Rate = 0.05  
 Reject Ho if  $p = P(Z \leq |z|) \leq \text{FDR}/2$  with stopping rule

```
. dunnstest iq9, by(iage) ma(bh) wrap
```

Warning: by() values are unlabeled, option nolabel implicit

Kruskal-Wallis equality-of-populations rank test

```

+-----+
| iage | Obs | Rank Sum |
+-----+-----+
| 3 | 2 | 58.00 |
| 4 | 12 | 289.50 |
| 5 | 14 | 451.00 |
| 6 | 25 | 843.50 |
| 7 | 10 | 374.00 |
+-----+

```

chi-squared = 3.363 with 4 d.f.  
 probability = 0.4989

chi-squared with ties = 4.008 with 4 d.f.  
 probability = 0.4049

Dunn's Pairwise Comparison of iq9 by iage  
 (Benjamini-Hochberg)

| Col Mean- |           |           |           |           |
|-----------|-----------|-----------|-----------|-----------|
| Row Mean  |           | 3         | 4         | 5         |
| 4         | 0.380111  |           |           |           |
|           | 0.4399    |           |           |           |
| 5         | -0.253220 | -1.224538 |           |           |
|           | 0.4000    | 0.3679    |           |           |
| 6         | -0.384128 | -1.630434 | -0.272188 |           |
|           | 0.5006    | 0.2575    | 0.4364    |           |
| 7         | -0.645800 | -1.846324 | -0.745866 | -0.582520 |
|           | 0.5184    | 0.3242    | 0.5697    | 0.4668    |

False Discovery Rate = 0.05  
 Reject Ho if  $p = P(Z \leq |z|) \leq \text{FDR}/2$  with stopping rule

```
. dunnstest iq10, by(iage) ma(bh) wrap
```

Warning: by() values are unlabeled, option nolabel implicit

Kruskal-Wallis equality-of-populations rank test

```

+-----+
| iage | Obs | Rank Sum |
+-----+-----+
| 3 | 2 | 70.00 |
| 4 | 12 | 389.00 |
| 5 | 14 | 394.00 |
| 6 | 25 | 813.00 |
| 7 | 10 | 350.00 |
+-----+

```

chi-squared = 0.968 with 4 d.f.  
 probability = 0.9147

chi-squared with ties = 3.737 with 4 d.f.  
 probability = 0.4428

Dunn's Pairwise Comparison of iq10 by iage  
 (Benjamini-Hochberg)

| Col Mean-<br>Row Mean |          | 3         | 4         | 5         | 6 |
|-----------------------|----------|-----------|-----------|-----------|---|
| 4                     | 0.362629 |           |           |           |   |
|                       | 0.5121   |           |           |           |   |
| 5                     | 0.972529 | 1.164725  |           |           |   |
|                       | 0.4135   | 0.4069    |           |           |   |
| 6                     | 0.361822 | -0.031546 | -1.405830 |           |   |
|                       | 0.4484   | 0.5416    | 0.3994    |           |   |
| 7                     | 0.000000 | -0.646845 | -1.775587 | -0.710605 |   |
|                       | 0.5000   | 0.4314    | 0.3790    | 0.4773    |   |

False Discovery Rate = 0.05  
 Reject Ho if  $p = P(Z \leq |z|) \leq \text{FDR}/2$  with stopping rule

- Question – For each of the questions, 1-10, is there a difference in the average response by gender?

```
. dunnstest iq1, by(igender)
```

Warning: by() values are unlabeled, option nolabel implicit

Kruskal-Wallis equality-of-populations rank test

| igender | Obs | Rank Sum |
|---------|-----|----------|
| 1       | 19  | 636.50   |
| 2       | 44  | 1379.50  |

chi-squared = 0.182 with 1 d.f.  
 probability = 0.6695

chi-squared with ties = 1.338 with 1 d.f.  
 probability = 0.2474

Dunn's Pairwise Comparison of iq1 by igender  
 (No adjustment)

| Col Mean-<br>Row Mean |          | 1 |
|-----------------------|----------|---|
| 2                     | 1.156689 |   |
|                       | 0.1237   |   |

alpha = 0.05  
 Reject Ho if  $p = P(Z \leq |z|) \leq \alpha/2$

```
. dunnstest iq2, by(igender)
```

Warning: by() values are unlabeled, option nolabel implicit

Kruskal-Wallis equality-of-populations rank test

| igender | Obs | Rank Sum |
|---------|-----|----------|
| 1       | 19  | 565.00   |
| 2       | 44  | 1451.00  |

chi-squared = 0.415 with 1 d.f.  
 probability = 0.5196



chi-squared with ties = 0.599 with 1 d.f.  
 probability = 0.4390

Dunn's Pairwise Comparison of iq2 by igender  
 (No adjustment)

| Col Mean-   |           |
|-------------|-----------|
| Row Mean    | 1         |
| -----+----- |           |
| 2           | -0.773826 |
|             | 0.2195    |

alpha = 0.05  
 Reject Ho if p = P(Z <= |z|) <= alpha/2

.  
 . dunnstest iq3, by(igender)

Warning: by() values are unlabeled, option nolabel implicit

Kruskal-Wallis equality-of-populations rank test

| igender | Obs | Rank Sum |
|---------|-----|----------|
| 1       | 19  | 629.00   |
| 2       | 44  | 1387.00  |

chi-squared = 0.099 with 1 d.f.  
 probability = 0.7531

chi-squared with ties = 0.198 with 1 d.f.  
 probability = 0.6560

Dunn's Pairwise Comparison of iq3 by igender  
 (No adjustment)

| Col Mean-   |          |
|-------------|----------|
| Row Mean    | 1        |
| -----+----- |          |
| 2           | 0.445408 |
|             | 0.3280   |

alpha = 0.05  
 Reject Ho if p = P(Z <= |z|) <= alpha/2

.  
 . dunnstest iq4, by(igender)

Warning: by() values are unlabeled, option nolabel implicit

Kruskal-Wallis equality-of-populations rank test

| igender | Obs | Rank Sum |
|---------|-----|----------|
| 1       | 19  | 534.50   |
| 2       | 44  | 1481.50  |

chi-squared = 1.212 with 1 d.f.  
 probability = 0.2710

chi-squared with ties = 1.894 with 1 d.f.  
 probability = 0.1688

Dunn's Pairwise Comparison of iq4 by igender  
 (No adjustment)

| Col Mean-   |           |
|-------------|-----------|
| Row Mean    | 1         |
| -----+----- |           |
| 2           | -1.376105 |
|             | 0.0844    |

alpha = 0.05

Reject Ho if  $p = P(Z \leq |z|) \leq \alpha/2$

```
. dunnstest iq5, by(igender)
```

Warning: by() values are unlabeled, option nolabel implicit

Kruskal-Wallis equality-of-populations rank test

```
+-----+
| igender | Obs | Rank Sum |
+-----+
|         1 | 19 | 614.50 |
|         2 | 44 | 1401.50 |
+-----+
```

chi-squared = 0.009 with 1 d.f.  
probability = 0.9225

chi-squared with ties = 0.023 with 1 d.f.  
probability = 0.8782

Dunn's Pairwise Comparison of iq5 by igender  
(No adjustment)

```
Col Mean-|
Row Mean |          1
-----+-----
      2 | 0.153230
      | 0.4391
```

alpha = 0.05  
Reject Ho if  $p = P(Z \leq |z|) \leq \alpha/2$

```
. dunnstest iq6, by(igender)
```

Warning: by() values are unlabeled, option nolabel implicit

Kruskal-Wallis equality-of-populations rank test

```
+-----+
| igender | Obs | Rank Sum |
+-----+
|         1 | 19 | 587.50 |
|         2 | 43 | 1365.50 |
+-----+
```

chi-squared = 0.028 with 1 d.f.  
probability = 0.8666

chi-squared with ties = 0.042 with 1 d.f.  
probability = 0.8380

Dunn's Pairwise Comparison of iq6 by igender  
(No adjustment)

```
Col Mean-|
Row Mean |          1
-----+-----
      2 | -0.204490
      | 0.4190
```

alpha = 0.05  
Reject Ho if  $p = P(Z \leq |z|) \leq \alpha/2$

```
. dunnstest iq7, by(igender)
```

Warning: by() values are unlabeled, option nolabel implicit

Kruskal-Wallis equality-of-populations rank test

```
+-----+
| igender | Obs | Rank Sum |
+-----+
|         1 | 19 | 587.50 |
|         2 | 43 | 1365.50 |
+-----+
```

```

|      1 | 19 | 551.00 |
|      2 | 44 | 1465.00 |
+-----+

```

```

chi-squared = 0.729 with 1 d.f.
probability = 0.3933

```

```

chi-squared with ties = 0.991 with 1 d.f.
probability = 0.3194

```

Dunn's Pairwise Comparison of iq7 by igender  
(No adjustment)

```

Col Mean-|
Row Mean |          1
+-----+
      2 | -0.995685
      | 0.1597

```

```

alpha = 0.05
Reject Ho if p = P(Z <= |z|) <= alpha/2

```

```

. dunnstest iq8, by(igender)

```

Warning: by() values are unlabeled, option nolabel implicit

Kruskal-Wallis equality-of-populations rank test

```

+-----+
| igender | Obs | Rank Sum |
+-----+
|      1 | 19 | 561.00 |
|      2 | 44 | 1455.00 |
+-----+

```

```

chi-squared = 0.495 with 1 d.f.
probability = 0.4815

```

```

chi-squared with ties = 0.570 with 1 d.f.
probability = 0.4501

```

Dunn's Pairwise Comparison of iq8 by igender  
(No adjustment)

```

Col Mean-|
Row Mean |          1
+-----+
      2 | -0.755307
      | 0.2250

```

```

alpha = 0.05
Reject Ho if p = P(Z <= |z|) <= alpha/2

```

```

. dunnstest iq9, by(igender)

```

Warning: by() values are unlabeled, option nolabel implicit

Kruskal-Wallis equality-of-populations rank test

```

+-----+
| igender | Obs | Rank Sum |
+-----+
|      1 | 19 | 491.00 |
|      2 | 44 | 1525.00 |
+-----+

```

```

chi-squared = 3.070 with 1 d.f.
probability = 0.0797

```

```

chi-squared with ties = 3.658 with 1 d.f.
probability = 0.0558

```

Dunn's Pairwise Comparison of iq9 by igender  
(No adjustment)

```

Col Mean-|
Row Mean |          1
-----+-----
      2 | -1.912701
      |      0.0279

alpha = 0.05
Reject Ho if p = P(Z <= |z|) <= alpha/2

.
. dunnstest iq10, by(igender)

Warning: by() values are unlabeled, option nolabel implicit

Kruskal-Wallis equality-of-populations rank test

+-----+
| igender | Obs | Rank Sum |
+-----+
|      1 | 19 |    603.00 |
|      2 | 44 |   1413.00 |
+-----+

chi-squared = 0.006 with 1 d.f.
probability = 0.9403

chi-squared with ties = 0.022 with 1 d.f.
probability = 0.8830

```

Dunn's Pairwise Comparison of iq10 by igender  
(No adjustment)

```

Col Mean-|
Row Mean |          1
-----+-----
      2 | -0.147156
      |      0.4415

alpha = 0.05
Reject Ho if p = P(Z <= |z|) <= alpha/2

```

- Question – For each of the questions, 1-10, is there a difference in the average response [by level of education](#)

```

. dunnstest iq1, by(ied) ma(bh) wrap

Warning: by() values are unlabeled, option nolabel implicit

Kruskal-Wallis equality-of-populations rank test

+-----+
| ied | Obs | Rank Sum |
+-----+
|  1 |  1 |    32.50 |
|  2 |  3 |    97.50 |
|  3 | 57 |   1761.00 |
+-----+

chi-squared = 0.031 with 2 d.f.
probability = 0.9848

chi-squared with ties = 0.218 with 2 d.f.
probability = 0.8969

```

Dunn's Pairwise Comparison of iq1 by ied  
(Benjamini-Hochberg)

```

Col Mean-|
Row Mean |          1          2
-----+-----
      2 | 0.000000
      |      0.5000
      |
      3 | 0.239229  0.407392
      |      0.6082      1.0000

```

False Discovery Rate = 0.05  
 Reject Ho if  $p = P(Z \leq |z|) \leq \text{FDR}/2$  with stopping rule

```
. dunnstest iq2, by(ied) ma(bh) wrap
```

Warning: by() values are unlabeled, option nolabel implicit

Kruskal-Wallis equality-of-populations rank test

```
+-----+
| ied | Obs | Rank Sum |
+-----+-----+
| 1 | 1 | 40.50 |
| 2 | 3 | 121.50 |
| 3 | 57 | 1729.00 |
+-----+
```

chi-squared = 1.226 with 2 d.f.  
 probability = 0.5418

chi-squared with ties = 1.853 with 2 d.f.  
 probability = 0.3959

Dunn's Pairwise Comparison of iq2 by ied  
 (Benjamini-Hochberg)

| Col Mean- |          |          |
|-----------|----------|----------|
| Row Mean  | 1        | 2        |
| 2         | 0.000000 |          |
|           | 0.5000   |          |
|           |          |          |
| 3         | 0.698004 | 1.188657 |
|           | 0.3639   | 0.3519   |

False Discovery Rate = 0.05  
 Reject Ho if  $p = P(Z \leq |z|) \leq \text{FDR}/2$  with stopping rule

```
. dunnstest iq3, by(ied) ma(bh) wrap
```

Warning: by() values are unlabeled, option nolabel implicit

Kruskal-Wallis equality-of-populations rank test

```
+-----+
| ied | Obs | Rank Sum |
+-----+-----+
| 1 | 1 | 36.50 |
| 2 | 3 | 109.50 |
| 3 | 57 | 1745.00 |
+-----+
```

chi-squared = 0.411 with 2 d.f.  
 probability = 0.8143

chi-squared with ties = 0.917 with 2 d.f.  
 probability = 0.6323

Dunn's Pairwise Comparison of iq3 by ied  
 (Benjamini-Hochberg)

| Col Mean- |          |          |
|-----------|----------|----------|
| Row Mean  | 1        | 2        |
| 2         | 0.000000 |          |
|           | 0.5000   |          |
|           |          |          |
| 3         | 0.490961 | 0.836076 |
|           | 0.4676   | 0.6047   |

False Discovery Rate = 0.05  
 Reject Ho if  $p = P(Z \leq |z|) \leq \text{FDR}/2$  with stopping rule

```
. dunnstest iq4, by(ied) ma(bh) wrap
```

Warning: by() values are unlabeled, option nolabel implicit

Kruskal-Wallis equality-of-populations rank test

```
+-----+
| ied | Obs | Rank Sum |
+-----+
| 1 | 1 | 40.00 |
| 2 | 3 | 120.00 |
| 3 | 57 | 1731.00 |
+-----+
```

chi-squared = 1.100 with 2 d.f.  
probability = 0.5769

chi-squared with ties = 1.741 with 2 d.f.  
probability = 0.4187

Dunn's Pairwise Comparison of iq4 by ied  
(Benjamini-Hochberg)

| Col Mean- | Row Mean | 1        | 2        |
|-----------|----------|----------|----------|
| 2         |          | 0.000000 |          |
|           |          | 0.5000   |          |
|           |          |          |          |
| 3         |          | 0.676626 | 1.152253 |
|           |          | 0.3740   | 0.3738   |

False Discovery Rate = 0.05  
Reject Ho if p = P(Z <= |z|) <= FDR/2 with stopping rule

```
. dunnstest iq5, by(ied) ma(bh) wrap
```

Warning: by() values are unlabeled, option nolabel implicit

Kruskal-Wallis equality-of-populations rank test

```
+-----+
| ied | Obs | Rank Sum |
+-----+
| 1 | 1 | 35.50 |
| 2 | 3 | 73.50 |
| 3 | 57 | 1782.00 |
+-----+
```

chi-squared = 0.479 with 2 d.f.  
probability = 0.7870

chi-squared with ties = 1.261 with 2 d.f.  
probability = 0.5323

Dunn's Pairwise Comparison of iq5 by ied  
(Benjamini-Hochberg)

| Col Mean- | Row Mean | 1        | 2         |
|-----------|----------|----------|-----------|
| 2         |          | 0.870715 |           |
|           |          | 0.2879   |           |
|           |          |          |           |
| 3         |          | 0.383900 | -1.043578 |
|           |          | 0.3505   | 0.4450    |

False Discovery Rate = 0.05  
Reject Ho if p = P(Z <= |z|) <= FDR/2 with stopping rule

```
. dunnstest iq6, by(ied) ma(bh) wrap
```

Warning: by() values are unlabeled, option nolabel implicit

Kruskal-Wallis equality-of-populations rank test

```
+-----+
| ied | Obs | Rank Sum |
+-----+
| 1 | 1 | 40.50 |
| 2 | 3 | 94.00 |
| 3 | 56 | 1695.50 |
+-----+
```

chi-squared = 0.344 with 2 d.f.  
probability = 0.8420

chi-squared with ties = 0.500 with 2 d.f.  
probability = 0.7788

Dunn's Pairwise Comparison of iq6 by ied  
(Benjamini-Hochberg)

```
Col Mean-|
Row Mean |          1          2
+-----+
  2 | 0.548145
    | 0.4377
    |
  3 | 0.699677 0.123104
    | 0.7262 0.4510
```

False Discovery Rate = 0.05  
Reject Ho if  $p = P(Z \leq |z|) \leq \text{FDR}/2$  with stopping rule

```
.
. dunnstest iq7, by(ied) ma(bh) wrap
```

Warning: by() values are unlabeled, option nolabel implicit

Kruskal-Wallis equality-of-populations rank test

```
+-----+
| ied | Obs | Rank Sum |
+-----+
| 1 | 1 | 42.50 |
| 2 | 3 | 99.50 |
| 3 | 57 | 1749.00 |
+-----+
```

chi-squared = 0.482 with 2 d.f.  
probability = 0.7857

chi-squared with ties = 0.659 with 2 d.f.  
probability = 0.7194

Dunn's Pairwise Comparison of iq7 by ied  
(Benjamini-Hochberg)

```
Col Mean-|
Row Mean |          1          2
+-----+
  2 | 0.532085
    | 0.4460
    |
  3 | 0.771080 0.275878
    | 0.6610 0.3913
```

False Discovery Rate = 0.05  
Reject Ho if  $p = P(Z \leq |z|) \leq \text{FDR}/2$  with stopping rule

```
.
. dunnstest iq8, by(ied) ma(bh) wrap
```

Warning: by() values are unlabeled, option nolabel implicit

Kruskal-Wallis equality-of-populations rank test

```
+-----+
| ied | Obs | Rank Sum |
+-----+
```

```

| 1 | 1 | 47.00 |
| 2 | 3 | 120.50 |
| 3 | 57 | 1723.50 |
+-----+

```

```

chi-squared = 1.717 with 2 d.f.
probability = 0.4237

```

```

chi-squared with ties = 1.981 with 2 d.f.
probability = 0.3713

```

Dunn's Pairwise Comparison of iq8 by ied  
(Benjamini-Hochberg)

```

Col Mean-|
Row Mean |          1          2
+-----+-----+
  2 | 0.358033
    | 0.3602
    |
  3 | 1.005400  1.014200
    | 0.2360    0.4657

```

```

False Discovery Rate = 0.05
Reject Ho if p = P(Z <= |z|) <= FDR/2 with stopping rule

```

```

. dunnstest iq9, by(ied) ma(bh) wrap

```

Warning: by() values are unlabeled, option nolabel implicit

Kruskal-Wallis equality-of-populations rank test

```

+-----+
| ied | Obs | Rank Sum |
+-----+-----+
| 1 | 1 | 45.50 |
| 2 | 3 | 136.50 |
| 3 | 57 | 1709.00 |
+-----+

```

```

chi-squared = 2.856 with 2 d.f.
probability = 0.2398

```

```

chi-squared with ties = 3.409 with 2 d.f.
probability = 0.1819

```

Dunn's Pairwise Comparison of iq9 by ied  
(Benjamini-Hochberg)

```

Col Mean-|
Row Mean |          1          2
+-----+-----+
  2 | 0.000000
    | 0.5000
    |
  3 | 0.946695  1.612164
    | 0.2578    0.1604

```

```

False Discovery Rate = 0.05
Reject Ho if p = P(Z <= |z|) <= FDR/2 with stopping rule

```

```

. dunnstest iq10, by(ied) ma(bh) wrap

```

Warning: by() values are unlabeled, option nolabel implicit

Kruskal-Wallis equality-of-populations rank test

```

+-----+
| ied | Obs | Rank Sum |
+-----+-----+
| 1 | 1 | 33.50 |
| 2 | 3 | 100.50 |
| 3 | 57 | 1757.00 |
+-----+

```



```

chi-squared =      0.085 with 2 d.f.
probability =      0.9584

chi-squared with ties =      0.375 with 2 d.f.
probability =      0.8288

```

Dunn's Pairwise Comparison of iq10 by ied  
(Benjamini-Hochberg)

| Col Mean- | 1        |          | 2 |  |
|-----------|----------|----------|---|--|
| Row Mean  | -----    |          |   |  |
| 2         | 0.000000 |          |   |  |
|           | 0.5000   |          |   |  |
|           |          |          |   |  |
| 3         | 0.314214 | 0.535088 |   |  |
|           | 0.5650   | 0.8889   |   |  |

```

False Discovery Rate = 0.05
Reject Ho if p = P(Z <= |z|) <= FDR/2 with stopping rule

```

- Question: For each of the questions, is there a difference in the average response based upon racer or ethnicity

```
. dunnstest iq1, by(ieth) ma(bh) wrap
```

```
Warning: by() values are unlabeled, option nolabel implicit
```

```
Kruskal-Wallis equality-of-populations rank test
```

| ieth | Obs | Rank Sum |
|------|-----|----------|
| 1    | 53  | 1744.50  |
| 2    | 2   | 36.00    |
| 3    | 1   | 33.50    |
| 4    | 4   | 134.00   |
| 7    | 3   | 68.00    |

```

chi-squared =      2.110 with 4 d.f.
probability =      0.7155

```

```

chi-squared with ties =      15.496 with 4 d.f.
probability =      0.0038

```

Dunn's Pairwise Comparison of iq1 by ieth  
(Benjamini-Hochberg)

| Col Mean- | 1         |           | 2        |          | 3 |  | 4 |  |
|-----------|-----------|-----------|----------|----------|---|--|---|--|
| Row Mean  | -----     |           |          |          |   |  |   |  |
| 2         | 3.061273  |           |          |          |   |  |   |  |
|           | 0.0110    |           |          |          |   |  |   |  |
|           |           |           |          |          |   |  |   |  |
| 3         | -0.085671 | -1.871072 |          |          |   |  |   |  |
|           | 0.5176    | 0.0613    |          |          |   |  |   |  |
|           |           |           |          |          |   |  |   |  |
| 4         | -0.166771 | -2.646096 | 0.000000 |          |   |  |   |  |
|           | 0.5422    | 0.0204    | 0.5000   |          |   |  |   |  |
|           |           |           |          |          |   |  |   |  |
| 7         | 2.553091  | -0.755791 | 1.387066 | 2.097047 |   |  |   |  |
|           | 0.0178    | 0.3213    | 0.1379   | 0.0450   |   |  |   |  |

```

False Discovery Rate = 0.05
Reject Ho if p = P(Z <= |z|) <= FDR/2 with stopping rule

```

```
. dunnstest iq2, by(ieth) ma(bh) wrap
```

```
Warning: by() values are unlabeled, option nolabel implicit
```

```
Kruskal-Wallis equality-of-populations rank test
```

```
+-----+
```

| ieth | Obs | Rank Sum |
|------|-----|----------|
| 1    | 53  | 1798.50  |
| 2    | 2   | 48.00    |
| 3    | 1   | 2.00     |
| 4    | 4   | 77.00    |
| 7    | 3   | 90.50    |

chi-squared = 5.615 with 4 d.f.  
probability = 0.2298

chi-squared with ties = 8.107 with 4 d.f.  
probability = 0.0877

Dunn's Pairwise Comparison of iq2 by ieth  
(Benjamini-Hochberg)

| Col Mean-<br>Row Mean | 1                  | 2                   | 3                   | 4                   |
|-----------------------|--------------------|---------------------|---------------------|---------------------|
| 2                     | 0.904070<br>0.2614 |                     |                     |                     |
| 3                     | 2.073966<br>0.1904 | 1.177565<br>0.2987  |                     |                     |
| 4                     | 1.856443<br>0.1585 | 0.359560<br>0.3596  | -1.011444<br>0.3118 |                     |
| 7                     | 0.416143<br>0.3763 | -0.442842<br>0.4112 | -1.599094<br>0.1830 | -0.937000<br>0.2906 |

False Discovery Rate = 0.05  
Reject Ho if  $p = P(Z \leq |z|) \leq \text{FDR}/2$  with stopping rule

. dunntest iq3, by(ieth) ma(bh) wrap

Warning: by() values are unlabeled, option nolabel implicit

Kruskal-Wallis equality-of-populations rank test

| ieth | Obs | Rank Sum |
|------|-----|----------|
| 1    | 53  | 1761.50  |
| 2    | 2   | 14.50    |
| 3    | 1   | 38.50    |
| 4    | 4   | 120.00   |
| 7    | 3   | 81.50    |

chi-squared = 4.269 with 4 d.f.  
probability = 0.3708

chi-squared with ties = 8.563 with 4 d.f.  
probability = 0.0730

Dunn's Pairwise Comparison of iq3 by ieth  
(Benjamini-Hochberg)

| Col Mean-<br>Row Mean | 1                   | 2                   | 3                  | 4                  |
|-----------------------|---------------------|---------------------|--------------------|--------------------|
| 2                     | 2.787277<br>0.0266  |                     |                    |                    |
| 3                     | -0.402941<br>0.3817 | -1.971406<br>0.0811 |                    |                    |
| 4                     | 0.482159<br>0.3936  | -2.029656<br>0.1060 | 0.587402<br>0.3978 |                    |
| 7                     | 0.790144<br>0.4294  | -1.685695<br>0.1148 | 0.758333<br>0.3735 | 0.286623<br>0.3872 |

False Discovery Rate = 0.05

Reject Ho if  $p = P(Z \leq |z|) \leq \text{FDR}/2$  with stopping rule

```
. dunnstest iq4, by(ieth) ma(bh) wrap
```

Warning: by() values are unlabeled, option nolabel implicit

Kruskal-Wallis equality-of-populations rank test

```
+-----+
| ieth | Obs | Rank Sum |
+-----+
| 1 | 53 | 1803.00 |
| 2 | 2 | 22.00 |
| 3 | 1 | 41.50 |
| 4 | 4 | 95.00 |
| 7 | 3 | 54.50 |
+-----+
```

chi-squared = 6.055 with 4 d.f.  
probability = 0.1951

chi-squared with ties = 9.464 with 4 d.f.  
probability = 0.0505

Dunn's Pairwise Comparison of iq4 by ieth  
(Benjamini-Hochberg)

| Col Mean- |           |           |          |          |
|-----------|-----------|-----------|----------|----------|
| Row Mean  | 1         | 2         | 3        | 4        |
| 2         | 2.179479  |           |          |          |
|           | 0.1465    |           |          |          |
| 3         | -0.505482 | -1.698444 |          |          |
|           | 0.3407    | 0.1490    |          |          |
| 4         | 1.350673  | -1.004099 | 1.082780 |          |
|           | 0.1768    | 0.2252    | 0.2324   |          |
| 7         | 1.821760  | -0.535433 | 1.378175 | 0.498577 |
|           | 0.1712    | 0.3702    | 0.2102   | 0.3090   |

False Discovery Rate = 0.05  
Reject Ho if  $p = P(Z \leq |z|) \leq \text{FDR}/2$  with stopping rule

```
. dunnstest iq5, by(ieth) ma(bh) wrap
```

Warning: by() values are unlabeled, option nolabel implicit

Kruskal-Wallis equality-of-populations rank test

```
+-----+
| ieth | Obs | Rank Sum |
+-----+
| 1 | 53 | 1808.50 |
| 2 | 2 | 39.50 |
| 3 | 1 | 7.50 |
| 4 | 4 | 148.00 |
| 7 | 3 | 12.50 |
+-----+
```

chi-squared = 10.605 with 4 d.f.  
probability = 0.0314

chi-squared with ties = 26.277 with 4 d.f.  
probability = 0.0001

Dunn's Pairwise Comparison of iq5 by ieth  
(Benjamini-Hochberg)

| Col Mean- |          |   |   |   |
|-----------|----------|---|---|---|
| Row Mean  | 1        | 2 | 3 | 4 |
| 2         | 1.713447 |   |   |   |
|           | 0.0866   |   |   |   |

```

3 | 2.264929 0.858920
  | 0.0294 0.2440
4 | -0.476526 -1.710491 -2.265841
  | 0.3521 0.0726 0.0391
7 | 4.334614 1.465931 0.247897 3.691637
  | 0.0001 0.1019 0.4021 0.0006

```

False Discovery Rate = 0.05  
 Reject Ho if  $p = P(Z \leq |z|) \leq \text{FDR}/2$  with stopping rule

```
. dunnstest iq6, by(ieth) ma(bh) wrap
```

Warning: by() values are unlabeled, option nolabel implicit

Kruskal-Wallis equality-of-populations rank test

```

+-----+
| ieth | Obs | Rank Sum |
+-----+-----+
| 1 | 52 | 1672.00 |
| 2 | 2 | 54.50 |
| 3 | 1 | 41.50 |
| 4 | 4 | 166.00 |
| 7 | 3 | 19.00 |
+-----+

```

chi-squared = 7.553 with 4 d.f.  
 probability = 0.1094

chi-squared with ties = 11.196 with 4 d.f.  
 probability = 0.0245

Dunn's Pairwise Comparison of iq6 by ieth  
 (Benjamini-Hochberg)

```

Col Mean-|
Row Mean |          1          2          3          4
+-----+-----+-----+-----+
2 | 0.459251
  | 0.3589
3 | -0.624727 -0.785168
  | 0.3326 0.3088
4 | -1.215526 -1.110396 0.000000
  | 0.2242 0.2224 0.5000
7 | 2.934536 1.546239 2.055206 3.107180
  | 0.0084 0.1526 0.0664 0.0094

```

False Discovery Rate = 0.05  
 Reject Ho if  $p = P(Z \leq |z|) \leq \text{FDR}/2$  with stopping rule

```
. dunnstest iq7, by(ieth) ma(bh) wrap
```

Warning: by() values are unlabeled, option nolabel implicit

Kruskal-Wallis equality-of-populations rank test

```

+-----+
| ieth | Obs | Rank Sum |
+-----+-----+
| 1 | 53 | 1815.00 |
| 2 | 2 | 47.00 |
| 3 | 1 | 15.00 |
| 4 | 4 | 77.00 |
| 7 | 3 | 62.00 |
+-----+

```

chi-squared = 5.167 with 4 d.f.  
 probability = 0.2705

chi-squared with ties = 7.030 with 4 d.f.  
 probability = 0.1343

```

Dunn's Pairwise Comparison of iq7 by ieth
(Benjamini-Hochberg)
Col Mean-|
Row Mean |          1          2          3          4
-----+-----
  2 | 0.949225
    | 0.4281
    |
  3 | 1.213236 0.441625
    | 0.3751 0.6588
    |
  4 | 1.840200 0.312276 -0.241888
    | 0.3287 0.5392 0.5055
    |
  7 | 1.455928 0.197500 -0.312276 -0.118029
    | 0.3635 0.4686 0.6290 0.4530
  
```

False Discovery Rate = 0.05  
 Reject Ho if  $p = P(Z \leq |z|) \leq \text{FDR}/2$  with stopping rule

```
. dunntest iq8, by(ieth) ma(bh) wrap
```

Warning: by() values are unlabeled, option nolabel implicit

Kruskal-Wallis equality-of-populations rank test

```

+-----+
| ieth | Obs | Rank Sum |
+-----+-----+
| 1 | 53 | 1804.00 |
| 2 | 2 | 27.00 |
| 3 | 1 | 48.50 |
| 4 | 4 | 92.50 |
| 7 | 3 | 44.00 |
+-----+
  
```

chi-squared = 7.123 with 4 d.f.  
 probability = 0.1295

chi-squared with ties = 8.202 with 4 d.f.  
 probability = 0.0845

```

Dunn's Pairwise Comparison of iq8 by ieth
(Benjamini-Hochberg)
Col Mean-|
Row Mean |          1          2          3          4
-----+-----
  2 | 1.669101
    | 0.1189
    |
  3 | -0.838757 -1.672942
    | 0.2869 0.1572
    |
  4 | 1.232034 -0.650622 1.328647
    | 0.1816 0.3221 0.1840
    |
  7 | 1.910806 -0.074816 1.715276 0.648313
    | 0.2801 0.4702 0.2157 0.2871
  
```

False Discovery Rate = 0.05  
 Reject Ho if  $p = P(Z \leq |z|) \leq \text{FDR}/2$  with stopping rule

```
. dunntest iq9, by(ieth) ma(bh) wrap
```

Warning: by() values are unlabeled, option nolabel implicit

Kruskal-Wallis equality-of-populations rank test

```

+-----+
| ieth | Obs | Rank Sum |
+-----+
  
```

```

+-----+-----+-----+
| 1 | 53 | 1765.00 |
| 2 | 2 | 58.00 |
| 3 | 1 | 23.00 |
| 4 | 4 | 108.50 |
| 7 | 3 | 61.50 |
+-----+-----+-----+

```

chi-squared = 2.026 with 4 d.f.  
probability = 0.7310

chi-squared with ties = 2.414 with 4 d.f.  
probability = 0.6601

Dunn's Pairwise Comparison of iq9 by ieth  
(Benjamini-Hochberg)

```

Col Mean-|
Row Mean |          1          2          3          4
+-----+-----+-----+-----+
2 | 0.355651
  | 0.6018
3 | 0.607788 0.291742
  | 0.9055 0.5503
4 | 0.709405 0.128933 -0.219717
  | 1.0000 0.4986 0.5163
7 | 1.284614 0.554503 0.128933 0.516561
  | 0.9946 0.7240 0.4487 0.6055

```

False Discovery Rate = 0.05  
Reject Ho if  $p = P(Z \leq |z|) \leq \text{FDR}/2$  with stopping rule

. dunntest iq10, by(ieth) ma(bh) wrap

Warning: by() values are unlabeled, option nolabel implicit

Kruskal-Wallis equality-of-populations rank test

```

+-----+-----+-----+
| ieth | Obs | Rank Sum |
+-----+-----+-----+
| 1 | 53 | 1700.00 |
| 2 | 2 | 70.00 |
| 3 | 1 | 35.00 |
| 4 | 4 | 140.00 |
| 7 | 3 | 71.00 |
+-----+-----+-----+

```

chi-squared = 0.808 with 4 d.f.  
probability = 0.9373

chi-squared with ties = 3.122 with 4 d.f.  
probability = 0.5376

Dunn's Pairwise Comparison of iq10 by ieth  
(Benjamini-Hochberg)

```

Col Mean-|
Row Mean |          1          2          3          4
+-----+-----+-----+-----+
2 | -0.435279
  | 0.5528
3 | -0.310626 0.000000
  | 0.5401 0.5556
4 | -0.604682 0.000000 0.000000
  | 0.5454 0.6250 0.5000
7 | 1.519075 1.331032 1.052274 1.590888
  | 0.3219 0.3053 0.3658 0.5582

```

False Discovery Rate = 0.05  
Reject Ho if  $p = P(Z \leq |z|) \leq \text{FDR}/2$  with stopping rule

- Question – For each of the questions, 1-10, is there a difference in the average response if respondent is or was a hospital worker?

```
. dunnstest iq1, by(ihwork) ma(bh) wrap
```

Warning: by() values are unlabeled, option nolabel implicit

Kruskal-Wallis equality-of-populations rank test

```
+-----+
| ihwork | Obs | Rank Sum |
+-----+-----+
|      0 |  38 | 1211.00 |
|      1 |  16 |  503.50 |
|      2 |   9 |  301.50 |
+-----+-----+
```

```
chi-squared =      0.076 with 2 d.f.
probability =      0.9629
```

```
chi-squared with ties =      0.556 with 2 d.f.
probability =      0.7574
```

Dunn's Pairwise Comparison of iq1 by ihwork  
(Benjamini-Hochberg)

```
Col Mean-|
Row Mean |          0          1
+-----+-----+
  1 |  0.198272
    |  0.4214
    |
  2 | -0.650694 -0.720741
    |  0.3864   0.7066
```

```
False Discovery Rate =  0.05
Reject Ho if p = P(Z <= |z|) <= FDR/2 with stopping rule
```

```
. dunnstest iq2, by(ihwork) ma(bh) wrap
```

Warning: by() values are unlabeled, option nolabel implicit

Kruskal-Wallis equality-of-populations rank test

```
+-----+
| ihwork | Obs | Rank Sum |
+-----+-----+
|      0 |  38 | 1229.50 |
|      1 |  16 |  432.00 |
|      2 |   9 |  354.50 |
+-----+-----+
```

```
chi-squared =      2.667 with 2 d.f.
probability =      0.2635
```

```
chi-squared with ties =      3.851 with 2 d.f.
probability =      0.1458
```

Dunn's Pairwise Comparison of iq2 by ihwork  
(Benjamini-Hochberg)

```
Col Mean-|
Row Mean |          0          1
+-----+-----+
  1 |  1.177995
    |  0.1194
    |
  2 | -1.243802 -1.949178
    |  0.1602   0.0769
```

```

False Discovery Rate = 0.05
Reject Ho if p = P(Z <= |z|) <= FDR/2 with stopping rule

.
. dunnstest iq3, by(ihwork) ma(bh) wrap

Warning: by() values are unlabeled, option nolabel implicit

```

Kruskal-Wallis equality-of-populations rank test

```

+-----+
| ihwork | Obs | Rank Sum |
+-----+
|      0 |  38 | 1187.00 |
|      1 |  16 |  482.50 |
|      2 |   9 |  346.50 |
+-----+

```

```

chi-squared = 1.359 with 2 d.f.
probability = 0.5068

chi-squared with ties = 2.727 with 2 d.f.
probability = 0.2558

```

Dunn's Pairwise Comparison of iq3 by ihwork  
(Benjamini-Hochberg)

```

Col Mean-|
Row Mean |          0          1
+-----+
  1 |  0.280149
    |  0.3897
    |
  2 | -1.513775 -1.547192
    |  0.0976   0.1827

```

```

False Discovery Rate = 0.05
Reject Ho if p = P(Z <= |z|) <= FDR/2 with stopping rule

.
. dunnstest iq4, by(ihwork) ma(bh) wrap

Warning: by() values are unlabeled, option nolabel implicit

```

Kruskal-Wallis equality-of-populations rank test

```

+-----+
| ihwork | Obs | Rank Sum |
+-----+
|      0 |  38 | 1109.50 |
|      1 |  16 |  533.00 |
|      2 |   9 |  373.50 |
+-----+

```

```

chi-squared = 3.388 with 2 d.f.
probability = 0.1838

chi-squared with ties = 5.295 with 2 d.f.
probability = 0.0708

```

Dunn's Pairwise Comparison of iq4 by ihwork  
(Benjamini-Hochberg)

```

Col Mean-|
Row Mean |          0          1
+-----+
  1 | -0.941750
    |  0.1732
    |
  2 | -2.263389 -1.340169
    |  0.0354   0.1351

```

```

False Discovery Rate = 0.05
Reject Ho if p = P(Z <= |z|) <= FDR/2 with stopping rule

.
. dunnstest iq5, by(ihwork) ma(bh) wrap

```



Warning: by() values are unlabeled, option nolabel implicit

Kruskal-Wallis equality-of-populations rank test

```

+-----+
| ihwork | Obs | Rank Sum |
+-----+
|      0 | 38 | 1219.00 |
|      1 | 16 |  464.00 |
|      2 |  9 |  333.00 |
+-----+

```

chi-squared = 1.099 with 2 d.f.  
probability = 0.5773

chi-squared with ties = 2.723 with 2 d.f.  
probability = 0.2563

Dunn's Pairwise Comparison of iq5 by ihwork  
(Benjamini-Hochberg)

```

Col Mean-|
Row Mean |          0          1
+-----+
  1 |  0.887196
    |  0.1875
    |
  2 | -1.139947 -1.648784
    |  0.1907   0.1488

```

False Discovery Rate = 0.05  
Reject Ho if  $p = P(Z \leq |z|) \leq \text{FDR}/2$  with stopping rule

. dunnstest iq6, by(ihwork) ma(bh) wrap

Warning: by() values are unlabeled, option nolabel implicit

Kruskal-Wallis equality-of-populations rank test

```

+-----+
| ihwork | Obs | Rank Sum |
+-----+
|      0 | 38 | 1081.00 |
|      1 | 16 |  540.00 |
|      2 |  8 |  332.00 |
+-----+

```

chi-squared = 3.794 with 2 d.f.  
probability = 0.1500

chi-squared with ties = 5.625 with 2 d.f.  
probability = 0.0601

Dunn's Pairwise Comparison of iq6 by ihwork  
(Benjamini-Hochberg)

```

Col Mean-|
Row Mean |          0          1
+-----+
  1 | -1.200715
    |  0.1149
    |
  2 | -2.264381 -1.207799
    |  0.0353   0.1703

```

False Discovery Rate = 0.05  
Reject Ho if  $p = P(Z \leq |z|) \leq \text{FDR}/2$  with stopping rule

. dunnstest iq7, by(ihwork) ma(bh) wrap

Warning: by() values are unlabeled, option nolabel implicit

Kruskal-Wallis equality-of-populations rank test

```

+-----+
| ihwork | Obs | Rank Sum |
+-----+-----+
|      0 | 38 | 1189.00 |
|      1 | 16 |  460.00 |
|      2 |  9 |  367.00 |
+-----+-----+

```

chi-squared = 2.624 with 2 d.f.  
probability = 0.2693

chi-squared with ties = 3.570 with 2 d.f.  
probability = 0.1678

Dunn's Pairwise Comparison of iq7 by ihwork  
(Benjamini-Hochberg)

```

Col Mean-|
Row Mean |          0          1
+-----+-----+
  1 |  0.542224
    |  0.2938
    |
  2 | -1.628668 -1.836862
    |  0.0775   0.0993

```

False Discovery Rate = 0.05  
Reject Ho if  $p = P(Z \leq |z|) \leq \text{FDR}/2$  with stopping rule

```
. dunnstest iq8, by(ihwork) ma(bh) wrap
```

Warning: by() values are unlabeled, option nolabel implicit

Kruskal-Wallis equality-of-populations rank test

```

+-----+
| ihwork | Obs | Rank Sum |
+-----+-----+
|      0 | 38 | 1080.00 |
|      1 | 16 |  576.50 |
|      2 |  9 |  359.50 |
+-----+-----+

```

chi-squared = 3.913 with 2 d.f.  
probability = 0.1413

chi-squared with ties = 4.506 with 2 d.f.  
probability = 0.1051

Dunn's Pairwise Comparison of iq8 by ihwork  
(Benjamini-Hochberg)

```

Col Mean-|
Row Mean |          0          1
+-----+-----+
  1 | -1.494891
    |  0.1012
    |
  2 | -1.819713 -0.549796
    |  0.1032   0.2912

```

False Discovery Rate = 0.05  
Reject Ho if  $p = P(Z \leq |z|) \leq \text{FDR}/2$  with stopping rule

```
. dunnstest iq9, by(ihwork) ma(bh) wrap
```

Warning: by() values are unlabeled, option nolabel implicit

Kruskal-Wallis equality-of-populations rank test

```

+-----+
| ihwork | Obs | Rank Sum |
+-----+-----+
|      0 | 38 | 1096.00 |

```

```

|      1 | 16 | 545.00 |
|      2 |  9 | 375.00 |
+-----+

```

```

chi-squared =    3.833 with 2 d.f.
probability =    0.1471

```

```

chi-squared with ties =    4.568 with 2 d.f.
probability =    0.1019

```

Dunn's Pairwise Comparison of iq9 by ihwork  
(Benjamini-Hochberg)

```

Col Mean-|
Row Mean |          0          1
+-----+-----+
  1 | -1.043163
    |    0.1484
    |
  2 | -2.060159 -1.086818
    |    0.0591    0.2078

```

```

False Discovery Rate = 0.05
Reject Ho if p = P(Z <= |z|) <= FDR/2 with stopping rule

```

```

. dunnstest iq10, by(ihwork) ma(bh) wrap

```

```

Warning: by() values are unlabeled, option nolabel implicit

```

Kruskal-Wallis equality-of-populations rank test

```

+-----+
| ihwork | Obs | Rank Sum |
+-----+-----+
|      0 | 38 | 1206.00 |
|      1 | 16 | 495.00 |
|      2 |  9 | 315.00 |
+-----+

```

```

chi-squared =    0.303 with 2 d.f.
probability =    0.8596

```

```

chi-squared with ties =    1.169 with 2 d.f.
probability =    0.5574

```

Dunn's Pairwise Comparison of iq10 by ihwork  
(Benjamini-Hochberg)

```

Col Mean-|
Row Mean |          0          1
+-----+-----+
  1 |  0.287560
    |    0.3868
    |
  2 | -0.943719 -1.045310
    |    0.2590    0.4438

```

```

False Discovery Rate = 0.05
Reject Ho if p = P(Z <= |z|) <= FDR/2 with stopping rule

```
