# Supplementary material for: Informed consent, shared-decision making and a reasonable patient’s wishes based on a cross-sectional, national survey in the USA using a hypothetical scenario
Source: PubMed Central journal article supplement — BMJ Open. 2019 Jul 30;9(7):e028957. doi: 10.1136/bmjopen-2019-028957 (PMC6678025; doi:10.1136/bmjopen-2019-028957), 2019-07-30
Supplement: bmjopen-2019-028957supp007.pdf [file bmjopen-2019-028957supp007.pdf]

## HPESS Survey Statistics Report

- Question – For each of the questions, 1-10, is there a difference in the average response by age?

Answer – YES, but for only two questions:

Q1: age group 1 differed from all of the other groups.

Q2: age groups 1 and 5 differed from groups 2,3,4, but did not differ from each other.

- Question – For each of the questions, 1-10, is there a difference in the average response by gender?

Answer – NO – there are no significant differences in responses between genders for any of the 10 questions.

- Question – For each of the questions, 1-10, is there a difference in the average response by level of education

Answer – YES, for questions 1, 2, 3, and 10

Q1: 1 v. 3 2 v. 3

Q2: 1 v. 3 2 v. 3

Q3: 1 v.2 1 v. 3 2 v. 3

Q10: 1 v. 3 2 v. 3

- Question: For each of the questions, is there a difference in the average response based upon racer or ethnicity

Answer - NO – there are no significant difference in responses among races or ethnicities for any of the 10 questions.

- Question – For each of the questions, 1-10, is there a difference in the average response if respondent is or was a hospital worker?

Answer – YES – for questions 1, 2, and 5. For all three questions, group 1 is significantly different from both group 0, and group 2.

- Question – For each of the questions, 1-10, is there a difference in the average response by age among those who identified their age group?

```
. dunnstest iq1, by(iage) ma(bh) wrap
```

```
Kruskal-Wallis equality-of-populations rank test
```

```
+-----+
| iage | Obs | Rank Sum |
+-----+-----+
| 1 | 1 | 3.50 |
| 2 | 23 | 878.50 |
| 3 | 35 | 1376.50 |
| 4 | 11 | 456.50 |
| 5 | 5 | 169.50 |
+-----+-----+
| 6 | 1 | 41.50 |
+-----+-----+
```

```
chi-squared = 3.004 with 5 d.f.
probability = 0.6994
```

chi-squared with ties = 13.768 with 5 d.f.  
 probability = 0.0171

Dunn's Pairwise Comparison of iq1 by iage  
 (Benjamini-Hochberg)

| Col Mean-<br>Row Mean | 1                   | 2                   | 3                   | 4                  | 5                   |
|-----------------------|---------------------|---------------------|---------------------|--------------------|---------------------|
| 2                     | -3.292779<br>0.0025 |                     |                     |                    |                     |
| 3                     | -3.424849<br>0.0023 | -0.409178<br>0.4265 |                     |                    |                     |
| 4                     | -3.527106<br>0.0032 | -0.873848<br>0.3583 | -0.609012<br>0.3699 |                    |                     |
| 5                     | -2.690371<br>0.0134 | 0.843972<br>0.3322  | 1.100788<br>0.2903  | 1.366042<br>0.2149 |                     |
| 6                     | -2.604940<br>0.0138 | -0.313598<br>0.4349 | -0.207567<br>0.4476 | 0.000000<br>0.5000 | -0.672593<br>0.3759 |

False Discovery Rate = 0.05  
 Reject Ho if  $p = P(Z \leq |z|) \leq \text{FDR}/2$  with stopping rule

. dunnstest iq2, by(iage) ma(bh) wrap

Kruskal-Wallis equality-of-populations rank test

| iage | Obs | Rank Sum |
|------|-----|----------|
| 1    | 1   | 4.50     |
| 2    | 22  | 849.00   |
| 3    | 35  | 1357.50  |
| 4    | 11  | 462.00   |
| 5    | 5   | 172.50   |
| 6    | 1   | 4.50     |

chi-squared = 5.286 with 5 d.f.  
 probability = 0.3819

chi-squared with ties = 18.489 with 5 d.f.  
 probability = 0.0024

Dunn's Pairwise Comparison of iq2 by iage  
 (Benjamini-Hochberg)

| Col Mean-<br>Row Mean | 1                   | 2                   | 3                   | 4                  | 5                  |
|-----------------------|---------------------|---------------------|---------------------|--------------------|--------------------|
| 2                     | -2.861006<br>0.0063 |                     |                     |                    |                    |
| 3                     | -2.900874<br>0.0070 | -0.061439<br>0.5095 |                     |                    |                    |
| 4                     | -3.080845<br>0.0155 | -0.792177<br>0.2920 | -0.797937<br>0.3187 |                    |                    |
| 5                     | -2.349976<br>0.0201 | 0.708544<br>0.2761  | 0.769210<br>0.2761  | 1.193206<br>0.1940 |                    |
| 6                     | 0.000000<br>0.5000  | 2.861006<br>0.0053  | 2.900874<br>0.0093  | 3.080845<br>0.0077 | 2.349976<br>0.0176 |

False Discovery Rate = 0.05  
 Reject Ho if  $p = P(Z \leq |z|) \leq \text{FDR}/2$  with stopping rule

. dunnstest iq3, by(iage) ma(bh) wrap

Kruskal-Wallis equality-of-populations rank test

```

+-----+
| iage | Obs | Rank Sum |
+-----+
| 1 | 1 | 7.00 |
| 2 | 23 | 921.00 |
| 3 | 35 | 1347.00 |
| 4 | 11 | 419.00 |
| 5 | 5 | 187.00 |
+-----+
| 6 | 1 | 45.00 |
+-----+

```

chi-squared = 2.250 with 5 d.f.  
probability = 0.8136

chi-squared with ties = 5.288 with 5 d.f.  
probability = 0.3817

Dunn's Pairwise Comparison of iq3 by iage  
(Benjamini-Hochberg)

| Col Mean- | 1         | 2         | 3         | 4         | 5         |
|-----------|-----------|-----------|-----------|-----------|-----------|
| 2         | -2.245722 |           |           |           |           |
|           | 0.1854    |           |           |           |           |
| 3         | -2.155302 | 0.402900  |           |           |           |
|           | 0.1168    | 0.5725    |           |           |           |
| 4         | -2.066574 | 0.369776  | 0.079295  |           |           |
|           | 0.0969    | 0.4851    | 0.4684    |           |           |
| 5         | -1.926615 | 0.371927  | 0.157658  | 0.088931  |           |
|           | 0.1013    | 0.5325    | 0.5046    | 0.4978    |           |
| 6         | -1.865437 | -0.336858 | -0.445925 | -0.459239 | -0.481654 |
|           | 0.0932    | 0.4601    | 0.6147    | 0.6922    | 0.7876    |

False Discovery Rate = 0.05  
Reject Ho if  $p = P(Z \leq |z|) \leq \text{FDR}/2$  with stopping rule

. dunnstest iq4, by(iage) ma(bh) wrap

Kruskal-Wallis equality-of-populations rank test

```

+-----+
| iage | Obs | Rank Sum |
+-----+
| 1 | 1 | 13.00 |
| 2 | 23 | 934.00 |
| 3 | 36 | 1433.50 |
| 4 | 11 | 362.00 |
| 5 | 5 | 211.00 |
+-----+
| 6 | 1 | 49.50 |
+-----+

```

chi-squared = 2.656 with 5 d.f.  
probability = 0.7529

chi-squared with ties = 4.393 with 5 d.f.  
probability = 0.4944

Dunn's Pairwise Comparison of iq4 by iage  
(Benjamini-Hochberg)

| Col Mean- | 1         | 2        | 3 | 4 | 5 |
|-----------|-----------|----------|---|---|---|
| 2         | -1.553696 |          |   |   |   |
|           | 0.9019    |          |   |   |   |
| 3         | -1.520764 | 0.169968 |   |   |   |
|           | 0.3208    | 0.4325   |   |   |   |

```

4 | -1.095769  1.207400  1.153083
  |           0.2927   0.3409   0.3111
  |
5 | -1.532336 -0.185389 -0.286737 -0.990242
  |           0.4704   0.4569   0.4467   0.3019
  |
6 | -1.483678 -0.500363 -0.548924 -0.913141 -0.383084
  |           0.2586   0.4206   0.4373   0.3010   0.4385

```

False Discovery Rate = 0.05  
 Reject Ho if  $p = P(Z \leq |z|) \leq \text{FDR}/2$  with stopping rule

```
. dunnstest iq5, by(iage) ma(bh) wrap
```

Kruskal-Wallis equality-of-populations rank test

```

+-----+
| iage | Obs | Rank Sum |
+-----+
| 1 | 1 | 7.00 |
| 2 | 23 | 836.00 |
| 3 | 35 | 1476.50 |
| 4 | 11 | 377.00 |
| 5 | 5 | 185.00 |
+-----+
| 6 | 1 | 44.50 |
+-----+

```

chi-squared = 3.728 with 5 d.f.  
 probability = 0.5892

chi-squared with ties = 9.323 with 5 d.f.  
 probability = 0.0968

Dunn's Pairwise Comparison of iq5 by iage  
 (Benjamini-Hochberg)

```

Col Mean-|
Row Mean |           1           2           3           4           5
+-----+
2 | -2.057391
  |           0.1487
  |
3 | -2.484459 -1.557480
  |           0.0973   0.1279
  |
4 | -1.869894  0.405361  1.639361
  |           0.0922   0.4283   0.1264
  |
5 | -1.961161 -0.094649  0.776748 -0.362103
  |           0.1247   0.4623   0.4100   0.4138
  |
6 | -1.898886 -0.571498 -0.163411 -0.701210 -0.490290
  |           0.1080   0.4257   0.4662   0.4026   0.4254

```

False Discovery Rate = 0.05  
 Reject Ho if  $p = P(Z \leq |z|) \leq \text{FDR}/2$  with stopping rule

```
. dunnstest iq6, by(iage) ma(bh) wrap
```

Kruskal-Wallis equality-of-populations rank test

```

+-----+
| iage | Obs | Rank Sum |
+-----+
| 1 | 1 | 11.00 |
| 2 | 23 | 841.50 |
| 3 | 35 | 1397.00 |
| 4 | 11 | 468.50 |
| 5 | 5 | 161.50 |
+-----+
| 6 | 1 | 46.50 |
+-----+

```

chi-squared = 2.770 with 5 d.f.  
 probability = 0.7354

chi-squared with ties = 5.486 with 5 d.f.  
 probability = 0.3595

Dunn's Pairwise Comparison of iq6 by iage  
 (Benjamini-Hochberg)

| Col Mean-<br>Row Mean | 1                   | 2                   | 3                   | 4                   | 5                   |
|-----------------------|---------------------|---------------------|---------------------|---------------------|---------------------|
| 2                     | -1.596368<br>0.2070 |                     |                     |                     |                     |
| 3                     | -1.816984<br>0.2596 | -0.790016<br>0.3221 |                     |                     |                     |
| 4                     | -1.927631<br>0.4043 | -1.043792<br>0.3178 | -0.493509<br>0.3586 |                     |                     |
| 5                     | -1.239210<br>0.3229 | 0.553701<br>0.3624  | 1.015019<br>0.2907  | 1.215993<br>0.2800  |                     |
| 6                     | -1.599813<br>0.2741 | -0.618474<br>0.3656 | -0.413849<br>0.3637 | -0.238527<br>0.4057 | -0.826140<br>0.3406 |

False Discovery Rate = 0.05  
 Reject Ho if  $p = P(Z \leq |z|) \leq \text{FDR}/2$  with stopping rule

. dunntest iq7, by(iage) ma(bh) wrap

Kruskal-Wallis equality-of-populations rank test

| iage | Obs | Rank Sum |
|------|-----|----------|
| 1    | 1   | 13.50    |
| 2    | 22  | 819.00   |
| 3    | 35  | 1270.50  |
| 4    | 11  | 493.50   |
| 5    | 5   | 205.50   |
| 6    | 1   | 48.00    |

chi-squared = 2.907 with 5 d.f.  
 probability = 0.7143

chi-squared with ties = 4.855 with 5 d.f.  
 probability = 0.4338

Dunn's Pairwise Comparison of iq7 by iage  
 (Benjamini-Hochberg)

| Col Mean-<br>Row Mean | 1                   | 2                   | 3                   | 4                   | 5                   |
|-----------------------|---------------------|---------------------|---------------------|---------------------|---------------------|
| 2                     | -1.376058<br>0.2532 |                     |                     |                     |                     |
| 3                     | -1.333089<br>0.2281 | 0.202096<br>0.4499  |                     |                     |                     |
| 4                     | -1.780629<br>0.5623 | -1.226249<br>0.2358 | -1.469099<br>0.3545 |                     |                     |
| 5                     | -1.494032<br>0.5069 | -0.463525<br>0.4384 | -0.595349<br>0.4137 | 0.413781<br>0.4244  |                     |
| 6                     | -1.446590<br>0.2775 | -0.624762<br>0.4434 | -0.684085<br>0.4631 | -0.178063<br>0.4293 | -0.373508<br>0.4089 |

False Discovery Rate = 0.05  
 Reject Ho if  $p = P(Z \leq |z|) \leq \text{FDR}/2$  with stopping rule

. dunntest iq8, by(iage) ma(bh) wrap

Kruskal-Wallis equality-of-populations rank test

```

+-----+
| iage | Obs | Rank Sum |
+-----+
| 1 | 1 | 16.00 |
| 2 | 23 | 896.00 |
| 3 | 35 | 1360.00 |
| 4 | 11 | 356.00 |
| 5 | 5 | 239.50 |
+-----+
| 6 | 1 | 58.50 |
+-----+

```

chi-squared = 3.633 with 5 d.f.  
probability = 0.6034

chi-squared with ties = 4.157 with 5 d.f.  
probability = 0.5270

Dunn's Pairwise Comparison of iq8 by iage  
(Benjamini-Hochberg)

| Col Mean-<br>Row Mean | 1                   | 2                   | 3                   | 4                   | 5                   |
|-----------------------|---------------------|---------------------|---------------------|---------------------|---------------------|
| 2                     | -1.088658<br>0.3454 |                     |                     |                     |                     |
| 3                     | -1.091772<br>0.4124 | 0.017935<br>0.4928  |                     |                     |                     |
| 4                     | -0.758949<br>0.2584 | 0.871211<br>0.2398  | 0.910035<br>0.2721  |                     |                     |
| 5                     | -1.410676<br>0.5938 | -0.878018<br>0.2590 | -0.916267<br>0.2996 | -1.395398<br>0.4072 |                     |
| 6                     | -1.455798<br>1.0000 | -0.926803<br>0.3319 | -0.938242<br>0.3730 | -1.212211<br>0.4227 | -0.468751<br>0.3425 |

False Discovery Rate = 0.05  
Reject Ho if  $p = P(Z \leq |z|) \leq \text{FDR}/2$  with stopping rule

. dunnstest iq9, by(iage) ma(bh) wrap

Kruskal-Wallis equality-of-populations rank test

```

+-----+
| iage | Obs | Rank Sum |
+-----+
| 1 | 1 | 26.50 |
| 2 | 23 | 844.00 |
| 3 | 35 | 1377.00 |
| 4 | 11 | 443.50 |
| 5 | 5 | 208.50 |
+-----+
| 6 | 1 | 26.50 |
+-----+

```

chi-squared = 0.975 with 5 d.f.  
probability = 0.9646

chi-squared with ties = 1.158 with 5 d.f.  
probability = 0.9488

Dunn's Pairwise Comparison of iq9 by iage  
(Benjamini-Hochberg)

| Col Mean-<br>Row Mean | 1                   | 2                   | 3         | 4 | 5 |
|-----------------------|---------------------|---------------------|-----------|---|---|
| 2                     | -0.492653<br>0.5834 |                     |           |   |   |
| 3                     | -0.625047<br>0.7979 | -0.486788<br>0.4271 |           |   |   |
| 4                     | -0.653017           | -0.487754           | -0.139274 |   |   |

```

      |      0.9633      0.4693      0.5130
5 | -0.684890 -0.500594 -0.243357 -0.126456
      |      1.0000      0.6607      0.5048      0.4818
6 |  0.000000  0.492653  0.625047  0.653017  0.684890
      |      0.5000      0.5185      0.6649      1.0000      1.0000

```

False Discovery Rate = 0.05  
 Reject Ho if  $p = P(Z \leq |z|) \leq \text{FDR}/2$  with stopping rule

```
. dunnstest iq10, by(iage) ma(bh) wrap
```

Kruskal-Wallis equality-of-populations rank test

```

+-----+
| iage | Obs | Rank Sum |
+-----+-----+
|  1  |  1  |    6.50  |
|  2  | 23  |   856.50 |
|  3  | 35  |  1427.50 |
|  4  | 11  |   409.00 |
|  5  |  5  |   182.50 |
+-----+-----+
|  6  |  1  |    44.00 |
+-----+

```

chi-squared = 2.692 with 5 d.f.  
 probability = 0.7473

chi-squared with ties = 7.233 with 5 d.f.  
 probability = 0.2039

Dunn's Pairwise Comparison of iq10 by iage  
 (Benjamini-Hochberg)

```

Col Mean-|
Row Mean |----- 1----- 2----- 3----- 4----- 5
-----+-----+-----+-----+-----+
2 | -2.233632
   |      0.0957
3 | -2.509329 -0.980744
   |      0.0907      0.4084
4 | -2.180462  0.011605  0.773901
   |      0.0731      0.4954      0.4703
5 | -2.032789  0.111187  0.665386  0.093832
   |      0.0789      0.5258      0.4742      0.4957
6 | -1.968240 -0.491273 -0.235250 -0.484547 -0.508197
   |      0.0736      0.4674      0.5088      0.4282      0.5094

```

False Discovery Rate = 0.05  
 Reject Ho if  $p = P(Z \leq |z|) \leq \text{FDR}/2$  with stopping rule

- Question – For each of the questions, 1-10, is there a difference in the average response by gender?

```
. ranksum iq1, by(igender)
```

Two-sample Wilcoxon rank-sum (Mann-Whitney) test

```

igender |      obs      rank sum      expected
-----+-----+-----+-----+
1 |      17      629.5      654.5
2 |      59     2296.5     2271.5
-----+-----+-----+
combined |      76     2926      2926

```

```

unadjusted variance      6435.92
adjustment for ties      -5031.72
-----
adjusted variance        1404.20

```

```

Ho: iq1(igender==1) = iq1(igender==2)
    z = -0.667
    Prob > |z| = 0.5047

.
. ranksum iq2, by(igender)

Two-sample Wilcoxon rank-sum (Mann-Whitney) test

-----+-----
igender |      obs   rank sum   expected
-----+-----
      1 |      17       564       646
      2 |      58      2286      2204
-----+-----
combined |      75      2850      2850

unadjusted variance      6244.67
adjustment for ties      -4459.21
-----
adjusted variance        1785.46

Ho: iq2(igender==1) = iq2(igender==2)
    z = -1.941
    Prob > |z| = 0.0523

.
. ranksum iq3, by(igender)

Two-sample Wilcoxon rank-sum (Mann-Whitney) test

-----+-----
igender |      obs   rank sum   expected
-----+-----
      1 |      17       613      654.5
      2 |      59      2313      2271.5
-----+-----
combined |      76      2926      2926

unadjusted variance      6435.92
adjustment for ties      -3697.73
-----
adjusted variance        2738.19

Ho: iq3(igender==1) = iq3(igender==2)
    z = -0.793
    Prob > |z| = 0.4277

.
. ranksum iq4, by(igender)

Two-sample Wilcoxon rank-sum (Mann-Whitney) test

-----+-----
igender |      obs   rank sum   expected
-----+-----
      1 |      17       659       663
      2 |      60      2344      2340
-----+-----
combined |      77      3003      3003

unadjusted variance      6630.00
adjustment for ties      -2621.46
-----
adjusted variance        4008.54

Ho: iq4(igender==1) = iq4(igender==2)
    z = -0.063
    Prob > |z| = 0.9496

.
. ranksum iq5, by(igender)

Two-sample Wilcoxon rank-sum (Mann-Whitney) test

-----+-----
igender |      obs   rank sum   expected
-----+-----
      1 |      17       600.5      654.5
      2 |      59      2325.5      2271.5
-----+-----
combined |      76      2926      2926

```



```

unadjusted variance      6435.92
adjustment for ties      -3862.43
-----
adjusted variance        2573.49

```

```

Ho: iq5(igender==1) = iq5(igender==2)
    z = -1.064
    Prob > |z| = 0.2871

```

```

. ranksum iq6, by(igender)

```

Two-sample Wilcoxon rank-sum (Mann-Whitney) test

| igender  | obs | rank sum | expected |
|----------|-----|----------|----------|
| 1        | 17  | 684      | 654.5    |
| 2        | 59  | 2242     | 2271.5   |
| combined | 76  | 2926     | 2926     |

```

unadjusted variance      6435.92
adjustment for ties      -3186.72
-----
adjusted variance        3249.19

```

```

Ho: iq6(igender==1) = iq6(igender==2)
    z = 0.518
    Prob > |z| = 0.6048

```

```

. ranksum iq7, by(igender)

```

Two-sample Wilcoxon rank-sum (Mann-Whitney) test

| igender  | obs | rank sum | expected |
|----------|-----|----------|----------|
| 1        | 17  | 599      | 646      |
| 2        | 58  | 2251     | 2204     |
| combined | 75  | 2850     | 2850     |

```

unadjusted variance      6244.67
adjustment for ties      -2505.86
-----
adjusted variance        3738.81

```

```

Ho: iq7(igender==1) = iq7(igender==2)
    z = -0.769
    Prob > |z| = 0.4421

```

```

. ranksum iq8, by(igender)

```

Two-sample Wilcoxon rank-sum (Mann-Whitney) test

| igender  | obs | rank sum | expected |
|----------|-----|----------|----------|
| 1        | 17  | 610.5    | 654.5    |
| 2        | 59  | 2315.5   | 2271.5   |
| combined | 76  | 2926     | 2926     |

```

unadjusted variance      6435.92
adjustment for ties      -812.08
-----
adjusted variance        5623.84

```

```

Ho: iq8(igender==1) = iq8(igender==2)
    z = -0.587
    Prob > |z| = 0.5574

```

```

. ranksum iq9, by(igender)

```

Two-sample Wilcoxon rank-sum (Mann-Whitney) test

| igender | obs | rank sum | expected |
|---------|-----|----------|----------|
|---------|-----|----------|----------|

```

-----+-----
      1 |      17      597      654.5
      2 |      59     2329     2271.5
-----+-----
combined |      76     2926     2926

unadjusted variance      6435.92
adjustment for ties      -1019.01
-----
adjusted variance        5416.90

Ho: iq9(igender==1) = iq9(igender==2)
      z = -0.781
      Prob > |z| = 0.4347

.
. ranksum iq10, by(igender)

Two-sample Wilcoxon rank-sum (Mann-Whitney) test

      igender |      obs      rank sum      expected
-----+-----
      1 |      17      635.5      654.5
      2 |      59     2290.5     2271.5
-----+-----
combined |      76     2926      2926

unadjusted variance      6435.92
adjustment for ties      -4040.59
-----
adjusted variance        2395.32

Ho: iq10(igender==1) = iq10(igender==2)
      z = -0.388
      Prob > |z| = 0.6979

```

- Question – For each of the questions, 1-10, is there a difference in the average response by level of education

```

. dunnstest iq1, by(ied) ma(bh) wrap

Warning: by() values are unlabeled, option nolabel implicit

Kruskal-Wallis equality-of-populations rank test

+-----+
| ied | Obs | Rank Sum |
+-----+
| 1 | 26 | 965.00 |
| 2 | 49 | 1957.50 |
| 3 | 1 | 3.50 |
+-----+

chi-squared = 2.825 with 2 d.f.
probability = 0.2435

chi-squared with ties = 12.949 with 2 d.f.
probability = 0.0015

```

```

Dunn's Pairwise Comparison of iq1 by ied
(Benjamini-Hochberg)

Col Mean-|
Row Mean |      1      2
-----+-----
      2 | -1.132195
      |      0.1288
      |
      3 | 3.197953  3.498063
      | 0.0010  0.0007

False Discovery Rate = 0.05
Reject Ho if p = P(Z <= |z|) <= FDR/2 with stopping rule

```

```

. dunnstest iq2, by(ied) ma(bh) wrap

```

Warning: by() values are unlabeled, option nolabel implicit

Kruskal-Wallis equality-of-populations rank test

```
+-----+
| ied | Obs | Rank Sum |
+-----+-----+
| 1 | 26 | 979.50 |
| 2 | 48 | 1866.00 |
| 3 | 1 | 4.50 |
+-----+-----+
```

chi-squared = 2.446 with 2 d.f.  
probability = 0.2944

chi-squared with ties = 8.554 with 2 d.f.  
probability = 0.0139

Dunn's Pairwise Comparison of iq2 by ied  
(Benjamini-Hochberg)

```
Col Mean-|
Row Mean |          1          2
-----+-----+-----+
2 | -0.423546
   | 0.3359
   |
3 | 2.793337  2.919430
   | 0.0039    0.0053
```

False Discovery Rate = 0.05  
Reject Ho if  $p = P(Z \leq |z|) \leq \text{FDR}/2$  with stopping rule

. dunnstest iq3, by(ied) ma(bh) wrap

Warning: by() values are unlabeled, option nolabel implicit

Kruskal-Wallis equality-of-populations rank test

```
+-----+
| ied | Obs | Rank Sum |
+-----+-----+
| 1 | 26 | 904.00 |
| 2 | 49 | 2015.00 |
| 3 | 1 | 7.00 |
+-----+-----+
```

chi-squared = 3.468 with 2 d.f.  
probability = 0.1766

chi-squared with ties = 8.151 with 2 d.f.  
probability = 0.0170

Dunn's Pairwise Comparison of iq3 by ied  
(Benjamini-Hochberg)

```
Col Mean-|
Row Mean |          1          2
-----+-----+-----+
2 | -1.817857
   | 0.0345
   |
3 | 1.891823  2.345120
   | 0.0439    0.0285
```

False Discovery Rate = 0.05  
Reject Ho if  $p = P(Z \leq |z|) \leq \text{FDR}/2$  with stopping rule

. dunnstest iq4, by(ied) ma(bh) wrap

Warning: by() values are unlabeled, option nolabel implicit

Kruskal-Wallis equality-of-populations rank test

```

+-----+
| ied | Obs | Rank Sum |
+-----+
| 1 | 26 | 1021.50 |
| 2 | 50 | 1968.50 |
| 3 | 1 | 13.00 |
+-----+

```

chi-squared = 1.369 with 2 d.f.  
probability = 0.5044

chi-squared with ties = 2.264 with 2 d.f.  
probability = 0.3224

Dunn's Pairwise Comparison of iq4 by ied  
(Benjamini-Hochberg)

```

Col Mean-|
Row Mean |          1          2
+-----+
  2 | -0.019386
    | 0.4923
    |
  3 | 1.482968  1.500969
    | 0.1036    0.2000

```

False Discovery Rate = 0.05  
Reject Ho if  $p = P(Z \leq |z|) \leq \text{FDR}/2$  with stopping rule

```
. dunnstest iq5, by(ied) ma(bh) wrap
```

Warning: by() values are unlabeled, option nolabel implicit

Kruskal-Wallis equality-of-populations rank test

```

+-----+
| ied | Obs | Rank Sum |
+-----+
| 1 | 26 | 1044.50 |
| 2 | 49 | 1874.50 |
| 3 | 1 | 7.00 |
+-----+

```

chi-squared = 2.190 with 2 d.f.  
probability = 0.3345

chi-squared with ties = 5.477 with 2 d.f.  
probability = 0.0647

Dunn's Pairwise Comparison of iq5 by ied  
(Benjamini-Hochberg)

```

Col Mean-|
Row Mean |          1          2
+-----+
  2 | 0.566082
    | 0.2857
    |
  3 | 2.331166  2.215729
    | 0.0296    0.0200

```

False Discovery Rate = 0.05  
Reject Ho if  $p = P(Z \leq |z|) \leq \text{FDR}/2$  with stopping rule

```
. dunnstest iq6, by(ied) ma(bh) wrap
```

Warning: by() values are unlabeled, option nolabel implicit

Kruskal-Wallis equality-of-populations rank test

```

+-----+
| ied | Obs | Rank Sum |
+-----+
| 1 | 26 | 1024.00 |

```

```

| 2 | 49 | 1891.00 |
| 3 | 1 | 11.00 |
+-----+

```

```

chi-squared = 1.593 with 2 d.f.
probability = 0.4508

```

```

chi-squared with ties = 3.156 with 2 d.f.
probability = 0.2064

```

Dunn's Pairwise Comparison of iq6 by ied  
(Benjamini-Hochberg)

```

Col Mean-|
Row Mean |          1          2
+-----+-----+
  2 | 0.208239
    | 0.4175
    |
  3 | 1.775186  1.740803
    | 0.1138    0.0613

```

```

False Discovery Rate = 0.05
Reject Ho if p = P(Z <= |z|) <= FDR/2 with stopping rule

```

```

. dunnstest iq7, by(ied) ma(bh) wrap

```

```

Warning: by() values are unlabeled, option nolabel implicit

```

Kruskal-Wallis equality-of-populations rank test

```

+-----+
| ied | Obs | Rank Sum |
+-----+-----+
| 1 | 26 | 1065.50 |
| 2 | 48 | 1771.00 |
| 3 | 1 | 13.50 |
+-----+

```

```

chi-squared = 1.873 with 2 d.f.
probability = 0.3920

```

```

chi-squared with ties = 3.129 with 2 d.f.
probability = 0.2092

```

Dunn's Pairwise Comparison of iq7 by ied  
(Benjamini-Hochberg)

```

Col Mean-|
Row Mean |          1          2
+-----+-----+
  2 | 0.994759
    | 0.1599
    |
  3 | 1.599098  1.373101
    | 0.1647    0.1273

```

```

False Discovery Rate = 0.05
Reject Ho if p = P(Z <= |z|) <= FDR/2 with stopping rule

```

```

. dunnstest iq8, by(ied) ma(bh) wrap

```

```

Warning: by() values are unlabeled, option nolabel implicit

```

Kruskal-Wallis equality-of-populations rank test

```

+-----+
| ied | Obs | Rank Sum |
+-----+-----+
| 1 | 26 | 1025.50 |
| 2 | 49 | 1868.50 |
| 3 | 1 | 32.00 |
+-----+

```

```

chi-squared = 0.148 with 2 d.f.

```

```
probability = 0.9289
chi-squared with ties = 0.169 with 2 d.f.
probability = 0.9190
```

Dunn's Pairwise Comparison of iq8 by ied  
(Benjamini-Hochberg)

| Col Mean- | 1        |          | 2 |  |
|-----------|----------|----------|---|--|
| Row Mean  | -----    |          |   |  |
| 2         | 0.261480 |          |   |  |
|           | 0.3969   |          |   |  |
|           |          |          |   |  |
| 3         | 0.353785 | 0.294096 |   |  |
|           | 1.0000   | 0.5765   |   |  |

```
False Discovery Rate = 0.05
Reject Ho if p = P(Z <= |z|) <= FDR/2 with stopping rule
```

```
. dunnstest iq9, by(ied) ma(bh) wrap
```

```
Warning: by() values are unlabeled, option nolabel implicit
```

Kruskal-Wallis equality-of-populations rank test

| ied | Obs | Rank Sum |
|-----|-----|----------|
| 1   | 26  | 1086.50  |
| 2   | 49  | 1813.00  |
| 3   | 1   | 26.50    |

```
chi-squared = 1.098 with 2 d.f.
probability = 0.5776
```

```
chi-squared with ties = 1.304 with 2 d.f.
probability = 0.5209
```

Dunn's Pairwise Comparison of iq9 by ied  
(Benjamini-Hochberg)

| Col Mean- | 1        |          | 2 |  |
|-----------|----------|----------|---|--|
| Row Mean  | -----    |          |   |  |
| 2         | 0.974133 |          |   |  |
|           | 0.4950   |          |   |  |
|           |          |          |   |  |
| 3         | 0.740520 | 0.513063 |   |  |
|           | 0.3442   | 0.3040   |   |  |

```
False Discovery Rate = 0.05
Reject Ho if p = P(Z <= |z|) <= FDR/2 with stopping rule
```

```
. dunnstest iq10, by(ied) ma(bh) wrap
```

```
Warning: by() values are unlabeled, option nolabel implicit
```

Kruskal-Wallis equality-of-populations rank test

| ied | Obs | Rank Sum |
|-----|-----|----------|
| 1   | 26  | 956.50   |
| 2   | 49  | 1963.00  |
| 3   | 1   | 6.50     |

```
chi-squared = 2.501 with 2 d.f.
probability = 0.2864
```

```
chi-squared with ties = 6.720 with 2 d.f.
probability = 0.0347
```

```

Dunn's Pairwise Comparison of iq10 by ied
(Benjamini-Hochberg)
Col Mean-|
Row Mean |          1          2
-----+-----
    2 | -1.001222
      | 0.1584
      |
    3 | 2.206194  2.466110
      | 0.0205  0.0205

False Discovery Rate = 0.05
Reject Ho if p = P(Z <= |z|) <= FDR/2 with stopping rule

```

- Question: For each of the questions, is there a difference in the average response [based upon racer or ethnicity](#)

```

. dunnstest iq1, by(ieth) ma(bh) wrap
Warning: by() values are unlabeled, option nolabel implicit

```

Kruskal-Wallis equality-of-populations rank test

```

+-----+
| ieth | Obs | Rank Sum |
+-----+
| 1 | 39 | 1542.50 |
| 2 | 12 | 460.00 |
| 3 | 20 | 716.00 |
| 4 | 3 | 124.50 |
| 7 | 2 | 83.00 |
+-----+

```

```

chi-squared = 0.480 with 4 d.f.
probability = 0.9754

```

```

chi-squared with ties = 2.201 with 4 d.f.
probability = 0.6988

```

```

Dunn's Pairwise Comparison of iq1 by ieth
(Benjamini-Hochberg)
Col Mean-|
Row Mean |          1          2          3          4
-----+-----
    2 | 0.357681
      | 0.5147
      |
    3 | 1.322301  0.672593
      | 0.9303  0.6265
      |
    4 | -0.315316 -0.475595 -0.892515
      | 0.4703  0.6344  0.9303
      |
    7 | -0.260575 -0.401951 -0.745114  0.000000
      | 0.4413  0.5731  0.7603  0.5000

```

```

False Discovery Rate = 0.05
Reject Ho if p = P(Z <= |z|) <= FDR/2 with stopping rule

```

```

. dunnstest iq2, by(ieth) ma(bh) wrap
Warning: by() values are unlabeled, option nolabel implicit

```

Kruskal-Wallis equality-of-populations rank test

```

+-----+
| ieth | Obs | Rank Sum |
+-----+
| 1 | 38 | 1483.50 |
| 2 | 12 | 429.00 |
| 3 | 20 | 727.50 |

```

```

| 4 | 3 | 126.00 |
| 7 | 2 | 84.00 |
+-----+

```

```

chi-squared = 0.494 with 4 d.f.
probability = 0.9741

```

```

chi-squared with ties = 1.728 with 4 d.f.
probability = 0.7857

```

Dunn's Pairwise Comparison of iq2 by ieth  
(Benjamini-Hochberg)

| Col Mean- | 1         | 2         | 3         | 4        |
|-----------|-----------|-----------|-----------|----------|
| 2         | 0.852426  |           |           |          |
|           | 1.0000    |           |           |          |
| 3         | 0.827632  | -0.146874 |           |          |
|           | 0.6798    | 0.4907    |           |          |
| 4         | -0.423606 | -0.830842 | -0.779591 |          |
|           | 0.4799    | 1.0000    | 0.5445    |          |
| 7         | -0.350170 | -0.702190 | -0.650840 | 0.000000 |
|           | 0.4539    | 0.4826    | 0.4293    | 0.5000   |

```

False Discovery Rate = 0.05
Reject Ho if p = P(Z <= |z|) <= FDR/2 with stopping rule

```

```

. dunnstest iq3, by(ieth) ma(bh) wrap

```

```

Warning: by() values are unlabeled, option nolabel implicit

```

Kruskal-Wallis equality-of-populations rank test

```

+-----+
| ieth | Obs | Rank Sum |
+-----+
| 1 | 39 | 1641.00 |
| 2 | 12 | 350.00 |
| 3 | 20 | 710.00 |
| 4 | 3 | 135.00 |
| 7 | 2 | 90.00 |
+-----+

```

```

chi-squared = 3.969 with 4 d.f.
probability = 0.4102

```

```

chi-squared with ties = 9.329 with 4 d.f.
probability = 0.0534

```

Dunn's Pairwise Comparison of iq3 by ieth  
(Benjamini-Hochberg)

| Col Mean- | 1         | 2         | 3         | 4        |
|-----------|-----------|-----------|-----------|----------|
| 2         | 2.715092  |           |           |          |
|           | 0.0331    |           |           |          |
| 3         | 1.660183  | -1.204134 |           |          |
|           | 0.1615    | 0.2285    |           |          |
| 4         | -0.338704 | -1.702903 | -1.065239 |          |
|           | 0.4593    | 0.2215    | 0.2390    |          |
| 7         | -0.279903 | -1.439216 | -0.889312 | 0.000000 |
|           | 0.4331    | 0.1876    | 0.2670    | 0.5000   |

```

False Discovery Rate = 0.05
Reject Ho if p = P(Z <= |z|) <= FDR/2 with stopping rule

```

```

. dunnstest iq4, by(ieth) ma(bh) wrap

```



Warning: by() values are unlabeled, option nolabel implicit

Kruskal-Wallis equality-of-populations rank test

```

+-----+
| ieth | Obs | Rank Sum |
+-----+
| 1 | 39 | 1584.50 |
| 2 | 12 | 474.00 |
| 3 | 20 | 733.00 |
| 4 | 3 | 37.50 |
| 7 | 2 | 97.00 |
+-----+

```

chi-squared = 5.096 with 4 d.f.  
probability = 0.2776

chi-squared with ties = 8.628 with 4 d.f.  
probability = 0.0711

Dunn's Pairwise Comparison of iq4 by ieth  
(Benjamini-Hochberg)

| Col Mean- | 1         | 2         | 3         | 4         |
|-----------|-----------|-----------|-----------|-----------|
| Row Mean  |           |           |           |           |
| 2         | 0.201372  |           |           |           |
|           | 0.4202    |           |           |           |
| 3         | 0.852280  | 0.459885  |           |           |
|           | 0.3284    | 0.3587    |           |           |
| 4         | 2.766202  | 2.464580  | 2.298277  |           |
|           | 0.0284    | 0.0343    | 0.0269    |           |
| 7         | -0.639739 | -0.694317 | -0.941479 | -2.323629 |
|           | 0.3265    | 0.3482    | 0.3465    | 0.0336    |

False Discovery Rate = 0.05  
Reject Ho if  $p = P(Z \leq |z|) \leq \text{FDR}/2$  with stopping rule

```
. dunnstest iq5, by(ieth) ma(bh) wrap
```

Warning: by() values are unlabeled, option nolabel implicit

Kruskal-Wallis equality-of-populations rank test

```

+-----+
| ieth | Obs | Rank Sum |
+-----+
| 1 | 39 | 1585.50 |
| 2 | 12 | 384.00 |
| 3 | 20 | 771.50 |
| 4 | 3 | 96.00 |
| 7 | 2 | 89.00 |
+-----+

```

chi-squared = 1.818 with 4 d.f.  
probability = 0.7691

chi-squared with ties = 4.548 with 4 d.f.  
probability = 0.3369

Dunn's Pairwise Comparison of iq5 by ieth  
(Benjamini-Hochberg)

| Col Mean- | 1        | 2         | 3        | 4 |
|-----------|----------|-----------|----------|---|
| Row Mean  |          |           |          |   |
| 2         | 1.877283 |           |          |   |
|           | 0.3024   |           |          |   |
| 3         | 0.541285 | -1.289464 |          |   |
|           | 0.3677   | 0.4931    |          |   |
| 4         | 1.034332 | 0.000000  | 0.760484 |   |

```

      |      0.3762      0.5000      0.3725
7 | -0.379896 -1.172018 -0.572123 -0.980581
      |      0.3911      0.4020      0.4052      0.3268

```

False Discovery Rate = 0.05  
 Reject Ho if  $p = P(Z \leq |z|) \leq \text{FDR}/2$  with stopping rule

```
. dunnstest iq6, by(ieth) ma(bh) wrap
```

Warning: by() values are unlabeled, option nolabel implicit

Kruskal-Wallis equality-of-populations rank test

```

+-----+
| ieth | Obs | Rank Sum |
+-----+-----+
| 1 | 39 | 1547.50 |
| 2 | 12 | 479.50 |
| 3 | 20 | 666.50 |
| 4 | 3 | 139.50 |
| 7 | 2 | 93.00 |
+-----+

```

chi-squared = 1.918 with 4 d.f.  
 probability = 0.7508

chi-squared with ties = 3.799 with 4 d.f.  
 probability = 0.4338

Dunn's Pairwise Comparison of iq6 by ieth  
 (Benjamini-Hochberg)

| Col Mean- | 1         | 2         | 3         | 4        |
|-----------|-----------|-----------|-----------|----------|
| Row Mean  | -----     |           |           |          |
| 2         | -0.053834 |           |           |          |
|           | 0.5317    |           |           |          |
| 3         | 1.472508  | 1.157760  |           |          |
|           | 0.7044    | 0.4116    |           |          |
| 4         | -0.725506 | -0.645877 | -1.356183 |          |
|           | 0.4681    | 0.4320    | 0.4376    |          |
| 7         | -0.599554 | -0.545866 | -1.132205 | 0.000000 |
|           | 0.3920    | 0.3657    | 0.3219    | 0.5000   |

False Discovery Rate = 0.05  
 Reject Ho if  $p = P(Z \leq |z|) \leq \text{FDR}/2$  with stopping rule

```
. dunnstest iq7, by(ieth) ma(bh) wrap
```

Warning: by() values are unlabeled, option nolabel implicit

Kruskal-Wallis equality-of-populations rank test

```

+-----+
| ieth | Obs | Rank Sum |
+-----+-----+
| 1 | 38 | 1459.00 |
| 2 | 12 | 507.00 |
| 3 | 20 | 644.00 |
| 4 | 3 | 144.00 |
| 7 | 2 | 96.00 |
+-----+

```

chi-squared = 2.938 with 4 d.f.  
 probability = 0.5683

chi-squared with ties = 4.907 with 4 d.f.  
 probability = 0.2970

Dunn's Pairwise Comparison of iq7 by ieth

```

                                (Benjamini-Hochberg)
Col Mean-|
Row Mean |          1          2          3          4
-----|-----
  2 | -0.690387
    |      0.3500
    |
  3 |  1.329710  1.632067
    |      0.3060      0.5133
    |
  4 | -0.949754 -0.528220 -1.513248
    |      0.3422      0.3733      0.3255
    |
  7 | -0.785104 -0.446427 -1.263331  0.000000
    |      0.3603      0.3640      0.2581      0.5000

```

False Discovery Rate = 0.05  
 Reject Ho if  $p = P(Z \leq |z|) \leq \text{FDR}/2$  with stopping rule

```
. dunntest iq8, by(ieth) ma(bh) wrap
```

Warning: by() values are unlabeled, option nolabel implicit

Kruskal-Wallis equality-of-populations rank test

```

+-----+
| ieth | Obs | Rank Sum |
+-----+-----+
|  1  | 39 | 1519.00 |
|  2  | 12 |  510.00 |
|  3  | 20 |  673.50 |
|  4  |  3 |  106.50 |
|  7  |  2 |  117.00 |
+-----+

```

chi-squared = 3.060 with 4 d.f.  
 probability = 0.5478

chi-squared with ties = 3.502 with 4 d.f.  
 probability = 0.4775

Dunn's Pairwise Comparison of iq8 by ieth  
 (Benjamini-Hochberg)

```

Col Mean-|
Row Mean |          1          2          3          4
-----|-----
  2 | -0.521135
    |      0.3764
    |
  3 |  0.928892  1.170773
    |      0.2941      0.3021
    |
  4 |  0.278839  0.525328 -0.142791
    |      0.4335      0.4281      0.4432
    |
  7 | -1.306345 -1.014820 -1.621568 -1.220522
    |      0.4786      0.3102      0.5245      0.3704

```

False Discovery Rate = 0.05  
 Reject Ho if  $p = P(Z \leq |z|) \leq \text{FDR}/2$  with stopping rule

```
. dunntest iq9, by(ieth) ma(bh) wrap
```

Warning: by() values are unlabeled, option nolabel implicit

Kruskal-Wallis equality-of-populations rank test

```

+-----+
| ieth | Obs | Rank Sum |
+-----+-----+
|  1  | 39 | 1358.00 |
|  2  | 12 |  488.50 |
|  3  | 20 |  821.00 |
|  4  |  3 |  142.50 |
+-----+

```

```

| 7 | 2 | 116.00 |
+-----+
chi-squared = 3.527 with 4 d.f.
probability = 0.4738

chi-squared with ties = 4.191 with 4 d.f.
probability = 0.3808

```

```

Dunn's Pairwise Comparison of iq9 by ieth
(Benjamini-Hochberg)
Col Mean-|
Row Mean | 1 2 3 4
+-----+
2 | -0.880360
| 0.3156
3 | -1.118000 -0.046185
| 0.4393 0.4816
4 | -1.044571 -0.519338 -0.514209
| 0.2962 0.3772 0.3373
7 | -1.578074 -1.117498 -1.128123 -0.567738
| 0.5727 0.3297 0.6482 0.4073

```

```

False Discovery Rate = 0.05
Reject Ho if p = P(Z <= |z|) <= FDR/2 with stopping rule

```

```
. dunnstest iq10, by(ieth) ma(bh) wrap
```

```
Warning: by() values are unlabeled, option nolabel implicit
```

```
Kruskal-Wallis equality-of-populations rank test
```

```

+-----+
| ieth | Obs | Rank Sum |
+-----+
| 1 | 39 | 1603.50 |
| 2 | 12 | 415.50 |
| 3 | 20 | 687.00 |
| 4 | 3 | 132.00 |
| 7 | 2 | 88.00 |
+-----+

```

```

chi-squared = 1.933 with 4 d.f.
probability = 0.7481

chi-squared with ties = 5.194 with 4 d.f.
probability = 0.2680

```

```

Dunn's Pairwise Comparison of iq10 by ieth
(Benjamini-Hochberg)
Col Mean-|
Row Mean | 1 2 3 4
+-----+
2 | 1.459385
| 0.3611
3 | 1.825894 0.055902
| 0.3393 0.5308
4 | -0.357370 -1.078049 -1.156913
| 0.5149 0.3513 0.4122
7 | -0.295328 -0.911118 -0.965845 0.000000
| 0.4798 0.3019 0.3341 0.5000

```

```

False Discovery Rate = 0.05
Reject Ho if p = P(Z <= |z|) <= FDR/2 with stopping rule

```

```
. dunnstest iq1, by(ihwork) ma(bh) wrap
```

Warning: by() values are unlabeled, option nolabel implicit

Kruskal-Wallis equality-of-populations rank test

```
+-----+
| ihwork | Obs | Rank Sum |
+-----+
|      0 | 16 | 664.00 |
|      1 | 10 | 263.00 |
|      2 | 50 | 1999.00 |
+-----+
```

chi-squared = 3.572 with 2 d.f.  
probability = 0.1676

chi-squared with ties = 16.371 with 2 d.f.  
probability = 0.0003

Dunn's Pairwise Comparison of iq1 by ihwork  
(Benjamini-Hochberg)

```
Col Mean-|
Row Mean |          0          1
+-----+
  1 | 3.655494
    | 0.0002
    |
  2 | 0.513034 -3.828465
    | 0.3040 0.0002
```

False Discovery Rate = 0.05  
Reject Ho if  $p = P(Z \leq |z|) \leq \text{FDR}/2$  with stopping rule

```
.
. dunnstest iq2, by(ihwork) ma(bh) wrap
```

Warning: by() values are unlabeled, option nolabel implicit

Kruskal-Wallis equality-of-populations rank test

```
+-----+
| ihwork | Obs | Rank Sum |
+-----+
|      0 | 16 | 634.50 |
|      1 |  9 | 228.00 |
|      2 | 50 | 1987.50 |
+-----+
```

chi-squared = 3.455 with 2 d.f.  
probability = 0.1777

chi-squared with ties = 12.083 with 2 d.f.  
probability = 0.0024

Dunn's Pairwise Comparison of iq2 by ihwork  
(Benjamini-Hochberg)

```
Col Mean-|
Row Mean |          0          1
+-----+
  1 | 2.949684
    | 0.0024
    |
  2 | -0.028008 -3.416473
    | 0.4888 0.0010
```

False Discovery Rate = 0.05  
Reject Ho if  $p = P(Z \leq |z|) \leq \text{FDR}/2$  with stopping rule

```
.
. dunnstest iq3, by(ihwork) ma(bh) wrap
```

Warning: by() values are unlabeled, option nolabel implicit

Kruskal-Wallis equality-of-populations rank test

```

+-----+
| ihwork | Obs | Rank Sum |
+-----+-----+
|      0 | 16 |   644.00 |
|      1 | 10 |   298.00 |
|      2 | 50 |  1984.00 |
+-----+

```

chi-squared = 1.795 with 2 d.f.  
probability = 0.4075

chi-squared with ties = 4.220 with 2 d.f.  
probability = 0.1213

Dunn's Pairwise Comparison of iq3 by ihwork  
(Benjamini-Hochberg)

```

Col Mean-|
Row Mean |          0          1
+-----+-----+
  1 | 1.799706
    | 0.0539
    |
  2 | 0.137772 -1.980059
    | 0.4452 0.0715

```

False Discovery Rate = 0.05  
Reject Ho if p = P(Z <= |z|) <= FDR/2 with stopping rule

```
. dunnstest iq4, by(ihwork) ma(bh) wrap
```

Warning: by() values are unlabeled, option nolabel implicit

Kruskal-Wallis equality-of-populations rank test

```

+-----+
| ihwork | Obs | Rank Sum |
+-----+-----+
|      0 | 17 |   685.50 |
|      1 | 10 |   300.50 |
|      2 | 50 |  2017.00 |
+-----+

```

chi-squared = 1.839 with 2 d.f.  
probability = 0.3987

chi-squared with ties = 3.042 with 2 d.f.  
probability = 0.2185

Dunn's Pairwise Comparison of iq4 by ihwork  
(Benjamini-Hochberg)

```

Col Mean-|
Row Mean |          0          1
+-----+-----+
  1 | 1.481917
    | 0.1038
    |
  2 | -0.003372 -1.707601
    | 0.4987 0.1316

```

False Discovery Rate = 0.05  
Reject Ho if p = P(Z <= |z|) <= FDR/2 with stopping rule

```
. dunnstest iq5, by(ihwork) ma(bh) wrap
```

Warning: by() values are unlabeled, option nolabel implicit

Kruskal-Wallis equality-of-populations rank test

```

+-----+
| ihwork | Obs | Rank Sum |
+-----+-----+
|      0 | 16 |   712.00 |
|      1 | 10 |   220.00 |

```

```

|      2 | 50 | 1994.00 |
+-----+

```

```

chi-squared =      6.959 with 2 d.f.
probability =      0.0308

```

```

chi-squared with ties =    17.404 with 2 d.f.
probability =    0.0002

```

Dunn's Pairwise Comparison of iq5 by ihwork  
(Benjamini-Hochberg)

```

Col Mean-|
Row Mean |          0          1
+-----+
  1 | 3.997040
    | 0.0001
    |
  2 | 1.151855 -3.696235
    | 0.1247 0.0002

```

```

False Discovery Rate = 0.05
Reject Ho if p = P(Z <= |z|) <= FDR/2 with stopping rule

```

```

. dunntest iq6, by(ihwork) ma(bh) wrap

```

```

Warning: by() values are unlabeled, option nolabel implicit

```

Kruskal-Wallis equality-of-populations rank test

```

+-----+
| ihwork | Obs | Rank Sum |
+-----+
|      0 | 16 | 559.00 |
|      1 | 10 | 308.00 |
|      2 | 50 | 2059.00 |
+-----+

```

```

chi-squared =      2.369 with 2 d.f.
probability =      0.3060

```

```

chi-squared with ties =    4.692 with 2 d.f.
probability =    0.0958

```

Dunn's Pairwise Comparison of iq6 by ihwork  
(Benjamini-Hochberg)

```

Col Mean-|
Row Mean |          0          1
+-----+
  1 | 0.654135
    | 0.2565
    |
  2 | -1.385120 -1.909689
    | 0.1245 0.0843

```

```

False Discovery Rate = 0.05
Reject Ho if p = P(Z <= |z|) <= FDR/2 with stopping rule

```

```

. dunntest iq7, by(ihwork) ma(bh) wrap

```

```

Warning: by() values are unlabeled, option nolabel implicit

```

Kruskal-Wallis equality-of-populations rank test

```

+-----+
| ihwork | Obs | Rank Sum |
+-----+
|      0 | 16 | 644.50 |
|      1 |  9 | 353.00 |
|      2 | 50 | 1852.50 |
+-----+

```

```

chi-squared =      0.299 with 2 d.f.
probability =      0.8613

```

chi-squared with ties = 0.499 with 2 d.f.  
 probability = 0.7793

Dunn's Pairwise Comparison of iq7 by ihwork  
 (Benjamini-Hochberg)

| Col Mean- |          |          |
|-----------|----------|----------|
| Row Mean  | 0        | 1        |
| 1         | 0.150716 |          |
|           | 0.4401   |          |
| 2         | 0.667091 | 0.355734 |
|           | 0.7571   | 0.5415   |

False Discovery Rate = 0.05  
 Reject Ho if  $p = P(Z \leq |z|) \leq \text{FDR}/2$  with stopping rule

. dunnstest iq8, by(ihwork) ma(bh) wrap

Warning: by() values are unlabeled, option nolabel implicit

Kruskal-Wallis equality-of-populations rank test

| ihwork | Obs | Rank Sum |
|--------|-----|----------|
| 0      | 16  | 521.00   |
| 1      | 10  | 393.00   |
| 2      | 50  | 2012.00  |

chi-squared = 1.480 with 2 d.f.  
 probability = 0.4771

chi-squared with ties = 1.694 with 2 d.f.  
 probability = 0.4287

Dunn's Pairwise Comparison of iq8 by ihwork  
 (Benjamini-Hochberg)

| Col Mean- |           |           |
|-----------|-----------|-----------|
| Row Mean  | 0         | 1         |
| 1         | -0.809654 |           |
|           | 0.3136    |           |
| 2         | -1.294852 | -0.131451 |
|           | 0.2931    | 0.4477    |

False Discovery Rate = 0.05  
 Reject Ho if  $p = P(Z \leq |z|) \leq \text{FDR}/2$  with stopping rule

. dunnstest iq9, by(ihwork) ma(bh) wrap

Warning: by() values are unlabeled, option nolabel implicit

Kruskal-Wallis equality-of-populations rank test

| ihwork | Obs | Rank Sum |
|--------|-----|----------|
| 0      | 16  | 639.00   |
| 1      | 10  | 379.00   |
| 2      | 50  | 1908.00  |

chi-squared = 0.087 with 2 d.f.  
 probability = 0.9574

chi-squared with ties = 0.103 with 2 d.f.  
 probability = 0.9496



Dunn's Pairwise Comparison of iq9 by ihwork  
(Benjamini-Hochberg)

| Col Mean- |          |           |
|-----------|----------|-----------|
| Row Mean  | 0        | 1         |
| 1         | 0.249482 |           |
|           | 0.6022   |           |
|           |          |           |
| 2         | 0.305457 | -0.037047 |
|           | 1.0000   | 0.4852    |

False Discovery Rate = 0.05  
Reject Ho if  $p = P(Z \leq |z|) \leq \text{FDR}/2$  with stopping rule

.  
. dunnstest iq10, by(ihwork) ma(bh) wrap

Warning: by() values are unlabeled, option nolabel implicit

Kruskal-Wallis equality-of-populations rank test

| ihwork | Obs | Rank Sum |
|--------|-----|----------|
| 0      | 16  | 666.50   |
| 1      | 10  | 322.00   |
| 2      | 50  | 1937.50  |

chi-squared = 1.147 with 2 d.f.  
probability = 0.5635

chi-squared with ties = 3.082 with 2 d.f.  
probability = 0.2141

Dunn's Pairwise Comparison of iq10 by ihwork  
(Benjamini-Hochberg)

| Col Mean- |          |           |
|-----------|----------|-----------|
| Row Mean  | 0        | 1         |
| 1         | 1.741221 |           |
|           | 0.1225   |           |
|           |          |           |
| 2         | 0.751048 | -1.403500 |
|           | 0.2263   | 0.1204    |

False Discovery Rate = 0.05  
Reject Ho if  $p = P(Z \leq |z|) \leq \text{FDR}/2$  with stopping rule

.
