# Supplementary material for: Informed consent, shared-decision making and a reasonable patient’s wishes based on a cross-sectional, national survey in the USA using a hypothetical scenario
Source: PubMed Central journal article supplement — BMJ Open. 2019 Jul 30;9(7):e028957. doi: 10.1136/bmjopen-2019-028957 (PMC6678025; doi:10.1136/bmjopen-2019-028957), 2019-07-30
Supplement: bmjopen-2019-028957supp008.pdf [file bmjopen-2019-028957supp008.pdf]

## HPESS Survey Statistics on Factor Analysis Produced Variables

- Question – For each of the factor variables (knowledge, participation), is there a difference in the average response by age?

Answer – NO, not for either variable

- Question – For each of the factor variables (knowledge, participation), is there a difference in the average response by gender?

Answer – NO, not for either variable

- Question – For each of the factor variables (knowledge, participation), is there a difference in the average response by level of education

Answer – NO, not for either variable

- Question: For each of the factor variables (knowledge, participation), is there a difference in the average response based upon racer or ethnicity

Answer – K-Wallis (nonparametric ANOVA reports a significant p value for "knowledge" but the Dunn test finds no significant difference among the pairs tested. No significant difference was found for "participate"

- Question – For each of the factor variables (knowledge, participation), is there a difference in the average response by age?

```
. dunnstest iknowledge, by(iage) ma(bh) wrap
```

Kruskal-Wallis equality-of-populations rank test

```
+-----+
| iage | Obs | Rank Sum |
+-----+-----+
| 1 | 1 | 3.50 |
| 2 | 22 | 876.00 |
| 3 | 35 | 1415.50 |
| 4 | 11 | 324.50 |
| 5 | 5 | 209.50 |
+-----+-----+
| 6 | 1 | 21.00 |
+-----+-----+
```

```
chi-squared = 5.540 with 5 d.f.
probability = 0.3535
```

```
chi-squared with ties = 7.568 with 5 d.f.
probability = 0.1817
```

Dunn's Pairwise Comparison of iknowledge by iage  
(Benjamini-Hochberg)

```
Col Mean-|
Row Mean |          1          2          3          4          5
-----+-----+-----+-----+-----+
2 | -1.904824
   | 0.2130
   |
3 | -1.953424 -0.123125
   | 0.3808 0.4510
   |
4 | -1.334942 1.498433 1.697718
```

```

      |      0.2274      0.2010      0.1679
5 | -1.879853 -0.225341 -0.163446 -1.232896
      |      0.1503      0.4741      0.4662      0.2332
6 | -0.663600  0.986980  1.028078  0.436423  1.023149
      |      0.3456      0.2427      0.2849      0.4141      0.2552

```

False Discovery Rate = 0.05  
 Reject Ho if  $p = P(Z \leq |z|) \leq \text{FDR}/2$  with stopping rule

```
. dunnntest iparticipate, by(iage) ma(bh) wrap
```

Kruskal-Wallis equality-of-populations rank test

```

+-----+
| iage | Obs | Rank Sum |
+-----+-----+
| 1 | 1 | 10.00 |
| 2 | 22 | 810.00 |
| 3 | 35 | 1355.00 |
| 4 | 11 | 407.50 |
| 5 | 5 | 221.50 |
+-----+-----+
| 6 | 1 | 46.00 |
+-----+

```

chi-squared = 2.326 with 5 d.f.  
 probability = 0.8024

chi-squared with ties = 2.448 with 5 d.f.  
 probability = 0.7843

Dunn's Pairwise Comparison of iparticipate by iage  
 (Benjamini-Hochberg)

```

Col Mean-|
Row Mean |      1      2      3      4      5
+-----+-----+-----+-----+-----+
2 | -1.234590
   |      0.5425
3 | -1.332682 -0.328032
   |      0.6849      0.4643
4 | -1.218838 -0.028970  0.227253
   |      0.4179      0.4884      0.4732
5 | -1.473837 -0.710833 -0.549938 -0.633107
   |      1.0000      0.5965      0.5460      0.5643
6 | -1.198211 -0.422690 -0.338143 -0.403548 -0.073047
   |      0.3463      0.5604      0.5013      0.5149      0.5045

```

False Discovery Rate = 0.05  
 Reject Ho if  $p = P(Z \leq |z|) \leq \text{FDR}/2$  with stopping rule

**Question – For each of the factor variables (knowledge, participation), is there a difference in the average response by gender?**

```
. ranksum iknowledge, by(igender)
```

Two-sample Wilcoxon rank-sum (Mann-Whitney) test

```

igender |      obs      rank sum      expected
+-----+-----+-----+-----+
1 |      17          579          646
2 |      58         2271         2204
+-----+-----+-----+-----+
combined |      75         2850         2850

```

```

unadjusted variance      6244.67
adjustment for ties      -1673.27
-----
adjusted variance        4571.40

```

```
Ho: iknowl~e(igender==1) = iknowl~e(igender==2)
      z = -0.991
      Prob > |z| = 0.3217
```

```
. ranksum iparticipate, by(igender)
```

```
Two-sample Wilcoxon rank-sum (Mann-Whitney) test
```

| igender  | obs | rank sum | expected |
|----------|-----|----------|----------|
| 1        | 17  | 599.5    | 646      |
| 2        | 58  | 2250.5   | 2204     |
| combined | 75  | 2850     | 2850     |

```
unadjusted variance 6244.67
adjustment for ties -310.99
```

```
adjusted variance 5933.68
```

```
Ho: iparti~e(igender==1) = iparti~e(igender==2)
      z = -0.604
      Prob > |z| = 0.5461
```

- [Question – For each of the factor variables \(knowledge, participation\), is there a difference in the average response by level of education](#)

```
. dunnstest iknowledge, by(ied) ma(bh) wrap
```

```
Kruskal-Wallis equality-of-populations rank test
```

| ied | Obs | Rank Sum |
|-----|-----|----------|
| 1   | 26  | 952.00   |
| 2   | 48  | 1894.50  |
| 3   | 1   | 3.50     |

```
chi-squared = 2.829 with 2 d.f.
probability = 0.2431
```

```
chi-squared with ties = 3.864 with 2 d.f.
probability = 0.1449
```

Dunn's Pairwise Comparison of iknowledge by ied  
(Benjamini-Hochberg)

| Col Mean | 1         | 2        |
|----------|-----------|----------|
| 2        | -0.628394 | 0.2649   |
| 3        | 1.742681  | 1.909111 |
|          | 0.0610    | 0.0844   |

```
False Discovery Rate = 0.05
Reject Ho if p = P(Z <= |z|) <= FDR/2 with stopping rule
```

```
. dunnstest iparticipate, by(ied) ma(bh) wrap
```

```
Kruskal-Wallis equality-of-populations rank test
```

| ied | Obs | Rank Sum |
|-----|-----|----------|
| 1   | 26  | 1051.50  |
| 2   | 48  | 1784.00  |
| 3   | 1   | 14.50    |

```
chi-squared = 1.559 with 2 d.f.
probability = 0.4586

chi-squared with ties = 1.641 with 2 d.f.
probability = 0.4402
```

```
Dunn's Pairwise Comparison of iparticipate by ied
(Benjamini-Hochberg)
```

| Col Mean- | 1        | 2        |
|-----------|----------|----------|
| 2         | 0.633189 |          |
|           | 0.2633   |          |
| 3         | 1.198283 | 1.055981 |
|           | 0.3462   | 0.2182   |

```
False Discovery Rate = 0.05
Reject Ho if p = P(Z <= |z|) <= FDR/2 with stopping rule
```

- [Question: For each of the factor variables \(knowledge, participation\), is there a difference in the average response based upon racer or ethnicity](#)

```
. dunnstest iknowledge, by(ieth) ma(bh) wrap
```

```
Warning: by() values are unlabeled, option nolabel implicit
```

```
Kruskal-Wallis equality-of-populations rank test
```

| ieth | Obs | Rank Sum |
|------|-----|----------|
| 1    | 38  | 1601.50  |
| 2    | 12  | 333.00   |
| 3    | 20  | 759.00   |
| 4    | 3   | 53.50    |
| 7    | 2   | 103.00   |

```
chi-squared = 7.365 with 4 d.f.
probability = 0.1178
```

```
chi-squared with ties = 10.060 with 4 d.f.
probability = 0.0394
```

```
Dunn's Pairwise Comparison of iknowledge by ieth
(Benjamini-Hochberg)
```

| Col Mean- | 1         | 2         | 3         | 4         |
|-----------|-----------|-----------|-----------|-----------|
| 2         | 2.331226  |           |           |           |
|           | 0.0987    |           |           |           |
| 3         | 0.814293  | -1.498008 |           |           |
|           | 0.2308    | 0.1118    |           |           |
| 4         | 2.173971  | 0.823862  | 1.742413  |           |
|           | 0.0743    | 0.2563    | 0.1018    |           |
| 7         | -0.691538 | -1.667587 | -0.979809 | -1.977762 |
|           | 0.2446    | 0.0954    | 0.2337    | 0.0799    |

```
False Discovery Rate = 0.05
Reject Ho if p = P(Z <= |z|) <= FDR/2 with stopping rule
```

```
. dunnstest iparticipate, by(ieth) ma(bh) wrap
```

```
Warning: by() values are unlabeled, option nolabel implicit
```

```
Kruskal-Wallis equality-of-populations rank test
```

```

+-----+
| ieth | Obs | Rank Sum |
+-----+-----+
| 1 | 38 | 1430.50 |
| 2 | 12 | 507.00 |
| 3 | 20 | 659.50 |
| 4 | 3 | 128.00 |
| 7 | 2 | 125.00 |
+-----+

```

chi-squared = 4.195 with 4 d.f.  
probability = 0.3803

chi-squared with ties = 4.414 with 4 d.f.  
probability = 0.3528

Dunn's Pairwise Comparison of iparticipate by ieth  
(Benjamini-Hochberg)

| Col Mean- | 1         | 2         | 3         | 4         |
|-----------|-----------|-----------|-----------|-----------|
| 2         | -0.654633 |           |           |           |
|           | 0.3204    |           |           |           |
|           |           |           |           |           |
| 3         | 0.795667  | 1.195612  |           |           |
|           | 0.3552    | 0.2898    |           |           |
|           |           |           |           |           |
| 4         | -0.394164 | -0.030384 | -0.736811 |           |
|           | 0.3853    | 0.4879    | 0.3295    |           |
|           |           |           |           |           |
| 7         | -1.612653 | -1.247994 | -1.873935 | -1.022662 |
|           | 0.2670    | 0.3534    | 0.3047    | 0.3065    |

False Discovery Rate = 0.05  
Reject Ho if  $p = P(Z \leq |z|) \leq \text{FDR}/2$  with stopping rule
