# Supplementary material for: Informed consent, shared-decision making and a reasonable patient’s wishes based on a cross-sectional, national survey in the USA using a hypothetical scenario
Source: PubMed Central journal article supplement — BMJ Open. 2019 Jul 30;9(7):e028957. doi: 10.1136/bmjopen-2019-028957 (PMC6678025; doi:10.1136/bmjopen-2019-028957), 2019-07-30
Supplement: bmjopen-2019-028957supp009.pdf [file bmjopen-2019-028957supp009.pdf]

## National Survey Statistics Report

### Summary

- Question – For each of the questions, 1-10, are there differences in the average response by age?  
Answer – YES, for ALL questions there are significant differences among the responses of the various age groups
- Question – For each of the questions, 1-10, are there differences in the average response by gender?  
Answer – YES, for ALL questions there are significant differences between the responses of the genders.
- Question – For each of the questions, 1-10, are there differences in the average response by income level?  
Answer – YES, for questions 1, 2, 3, 4, and 6 there are differences in responses among income levels.
- Question: For each of the questions, are there differences in the average responses among regions?  
Answer – YES, but only for question 9.
- Question – For each of the questions, 1-10, are there differences in the average responses among the devices used?  
Answer – Yes, for all questions, except 2, 8 and 9, there are differences in the average responses among the devices used.

---

### Statistics

- Question – For each of the questions, 1-10, are there differences in the average response by age among those who identified their age group?

```
. dunnstest iq1, by(iage) ma(bh) wrap
Warning: by() values are unlabeled, option nolabel implicit
```

Kruskal-Wallis equality-of-populations rank test

```
+-----+
| iage | Obs | Rank Sum |
+-----+
| 2 | 297 | 136808.00 |
| 3 | 230 | 120095.00 |
| 4 | 343 | 193579.00 |
| 5 | 197 | 119296.00 |
+-----+
```

```
chi-squared = 31.130 with 3 d.f.
probability = 0.0001
```

```
chi-squared with ties = 53.379 with 3 d.f.
probability = 0.0001
```

Dunn's Pairwise Comparison of iq1 by iage  
(Benjamini-Hochberg)

```
Col Mean-|
Row Mean |          2          3          4
```

```

-----+-----
3 | -2.976209
  | 0.0022
4 | -5.561425 -2.104981
  | 0.0000 0.0212
5 | -6.702295 -3.651101 -1.958054
  | 0.0000 0.0003 0.0251

```

False Discovery Rate = 0.05  
 Reject Ho if  $p = P(Z \leq |z|) \leq \text{FDR}/2$  with stopping rule

```
. dunnstest iq2, by(iage) ma(bh) wrap
```

Warning: by() values are unlabeled, option nolabel implicit

Kruskal-Wallis equality-of-populations rank test

```

+-----+
| iage | Obs | Rank Sum |
+-----+-----+
| 2 | 297 | 137489.50 |
| 3 | 230 | 117935.00 |
| 4 | 343 | 193709.50 |
| 5 | 197 | 120644.00 |
+-----+

```

chi-squared = 33.059 with 3 d.f.  
 probability = 0.0001

chi-squared with ties = 47.662 with 3 d.f.  
 probability = 0.0001

Dunn's Pairwise Comparison of iq2 by iage  
 (Benjamini-Hochberg)

```

Col Mean-|
Row Mean |          2          3          4
-----+-----
3 | -2.210640
  | 0.0162
4 | -5.005456 -2.376918
  | 0.0000 0.0131
5 | -6.338529 -3.999461 -2.077098
  | 0.0000 0.0001 0.0189

```

False Discovery Rate = 0.05  
 Reject Ho if  $p = P(Z \leq |z|) \leq \text{FDR}/2$  with stopping rule

```
. dunnstest iq3, by(iage) ma(bh) wrap
```

Warning: by() values are unlabeled, option nolabel implicit

Kruskal-Wallis equality-of-populations rank test

```

+-----+
| iage | Obs | Rank Sum |
+-----+-----+
| 2 | 297 | 139770.50 |
| 3 | 230 | 117843.00 |
| 4 | 343 | 191441.00 |
| 5 | 197 | 120723.50 |
+-----+

```

chi-squared = 28.691 with 3 d.f.  
 probability = 0.0001

chi-squared with ties = 53.833 with 3 d.f.  
 probability = 0.0001

Dunn's Pairwise Comparison of iq3 by iage

```

                                (Benjamini-Hochberg)
Col Mean-|
Row Mean |                2                3                4
-----|-----
    3 | -2.113003
      |  0.0173
    4 | -4.908660 -2.387522
      |  0.0000  0.0102
    5 | -6.879036 -4.599409 -2.718488
      |  0.0000  0.0000  0.0049

```

False Discovery Rate = 0.05  
 Reject Ho if  $p = P(Z \leq |z|) \leq \text{FDR}/2$  with stopping rule

```
. dunnstest iq4, by(iage) ma(bh) wrap
```

Warning: by() values are unlabeled, option nolabel implicit

Kruskal-Wallis equality-of-populations rank test

```

+-----+
| iage | Obs | Rank Sum |
+-----+
|  2 | 297 | 131759.50 |
|  3 | 230 | 116810.50 |
|  4 | 343 | 196304.50 |
|  5 | 197 | 124903.50 |
+-----+

```

chi-squared = 53.252 with 3 d.f.  
 probability = 0.0001

chi-squared with ties = 70.467 with 3 d.f.  
 probability = 0.0001

```

                                Dunn's Pairwise Comparison of iq4 by iage
                                (Benjamini-Hochberg)
Col Mean-|
Row Mean |                2                3                4
-----|-----
    3 | -2.730052
      |  0.0038
    4 | -6.060387 -2.822725
      |  0.0000  0.0036
    5 | -7.734777 -4.851098 -2.576905
      |  0.0000  0.0000  0.0050

```

False Discovery Rate = 0.05  
 Reject Ho if  $p = P(Z \leq |z|) \leq \text{FDR}/2$  with stopping rule

```
. dunnstest iq5, by(iage) ma(bh) wrap
```

Warning: by() values are unlabeled, option nolabel implicit

Kruskal-Wallis equality-of-populations rank test

```

+-----+
| iage | Obs | Rank Sum |
+-----+
|  2 | 297 | 130735.50 |
|  3 | 230 | 118988.50 |
|  4 | 343 | 197372.50 |
|  5 | 197 | 122681.50 |
+-----+

```

chi-squared = 50.736 with 3 d.f.  
 probability = 0.0001

chi-squared with ties = 74.894 with 3 d.f.  
 probability = 0.0001

Dunn's Pairwise Comparison of iq5 by iage  
(Benjamini-Hochberg)

| Col Mean-<br>Row Mean | 2                   | 3                   | 4                   |
|-----------------------|---------------------|---------------------|---------------------|
| 3                     | -3.463252<br>0.0004 |                     |                     |
| 4                     | -6.727241<br>0.0000 | -2.687273<br>0.0043 |                     |
| 5                     | -7.833291<br>0.0000 | -4.280955<br>0.0000 | -2.086904<br>0.0184 |

False Discovery Rate = 0.05  
Reject Ho if  $p = P(Z \leq |z|) \leq \text{FDR}/2$  with stopping rule

```
. dunnstest iq6, by(iage) ma(bh) wrap
```

Warning: by() values are unlabeled, option nolabel implicit

## Kruskal-Wallis equality-of-populations rank test

| iage | Obs | Rank Sum  |
|------|-----|-----------|
| 2    | 297 | 139523.00 |
| 3    | 230 | 121315.50 |
| 4    | 343 | 196979.50 |
| 5    | 197 | 111960.00 |

chi-squared = 21.310 with 3 d.f.  
probability = 0.0001

chi-squared with ties = 31.684 with 3 d.f.  
probability = 0.0001

Dunn's Pairwise Comparison of iq6 by iage  
(Benjamini-Hochberg)

| Col Mean-<br>Row Mean | 2                   | 3                   | 4                  |
|-----------------------|---------------------|---------------------|--------------------|
| 3                     | -2.598612<br>0.0094 |                     |                    |
| 4                     | -5.217225<br>0.0000 | -2.174021<br>0.0223 |                    |
| 5                     | -4.243787<br>0.0000 | -1.665690<br>0.0575 | 0.263774<br>0.3960 |

False Discovery Rate = 0.05  
Reject Ho if  $p = P(Z \leq |z|) \leq \text{FDR}/2$  with stopping rule

```
. dunnstest iq7, by(iage) ma(bh) wrap
```

Warning: by() values are unlabeled, option nolabel implicit

## Kruskal-Wallis equality-of-populations rank test

| iage | Obs | Rank Sum  |
|------|-----|-----------|
| 2    | 297 | 134994.00 |
| 3    | 230 | 118404.00 |
| 4    | 343 | 195415.00 |
| 5    | 197 | 120965.00 |

chi-squared = 38.545 with 3 d.f.  
probability = 0.0001

chi-squared with ties = 47.396 with 3 d.f.  
 probability = 0.0001

Dunn's Pairwise Comparison of iq7 by iage  
 (Benjamini-Hochberg)

| Col Mean-<br>Row Mean | 2                   | 3                   | 4                   |
|-----------------------|---------------------|---------------------|---------------------|
| 3                     | -2.469339<br>0.0102 |                     |                     |
| 4                     | -5.229834<br>0.0000 | -2.318978<br>0.0122 |                     |
| 5                     | -6.246620<br>0.0000 | -3.678399<br>0.0002 | -1.783685<br>0.0372 |

False Discovery Rate = 0.05  
 Reject Ho if  $p = P(Z \leq |z|) \leq \text{FDR}/2$  with stopping rule

. dunnstest iq8, by(iage) ma(bh) wrap

Warning: by() values are unlabeled, option nolabel implicit

Kruskal-Wallis equality-of-populations rank test

| iage | Obs | Rank Sum  |
|------|-----|-----------|
| 2    | 297 | 144264.00 |
| 3    | 230 | 123659.00 |
| 4    | 343 | 195323.50 |
| 5    | 197 | 106531.50 |

chi-squared = 11.953 with 3 d.f.  
 probability = 0.0075

chi-squared with ties = 13.243 with 3 d.f.  
 probability = 0.0041

Dunn's Pairwise Comparison of iq8 by iage  
 (Benjamini-Hochberg)

| Col Mean-<br>Row Mean | 2                   | 3                   | 4                  |
|-----------------------|---------------------|---------------------|--------------------|
| 3                     | -2.018706<br>0.0435 |                     |                    |
| 4                     | -3.607781<br>0.0009 | -1.274845<br>0.1518 |                    |
| 5                     | -2.045700<br>0.0612 | -0.109821<br>0.4563 | 1.096108<br>0.1638 |

False Discovery Rate = 0.05  
 Reject Ho if  $p = P(Z \leq |z|) \leq \text{FDR}/2$  with stopping rule

. dunnstest iq9, by(iage) ma(bh) wrap

Warning: by() values are unlabeled, option nolabel implicit

Kruskal-Wallis equality-of-populations rank test

| iage | Obs | Rank Sum  |
|------|-----|-----------|
| 2    | 297 | 145982.00 |
| 3    | 230 | 123673.00 |
| 4    | 343 | 185055.00 |
| 5    | 197 | 115068.00 |

```
chi-squared = 10.994 with 3 d.f.
probability = 0.0118

chi-squared with ties = 12.738 with 3 d.f.
probability = 0.0052
```

```
Dunn's Pairwise Comparison of iq9 by iage
(Benjamini-Hochberg)

Col Mean-|
Row Mean |          2          3          4
-----|-----
3 | -1.836776
  | 0.0662
  |
4 | -2.115200 -0.074195
  | 0.0516 0.4704
  |
5 | -3.519369 -1.669304 -1.742007
  | 0.0013 0.0570 0.0611
```

```
False Discovery Rate = 0.05
Reject Ho if p = P(Z <= |z|) <= FDR/2 with stopping rule
```

```
. dunntest iq10, by(iage) ma(bh) wrap
```

```
Warning: by() values are unlabeled, option nolabel implicit
```

```
Kruskal-Wallis equality-of-populations rank test
```

```
+-----+
| iage | Obs | Rank Sum |
+-----+
| 2 | 297 | 134627.00 |
| 3 | 230 | 122540.00 |
| 4 | 343 | 194647.50 |
| 5 | 197 | 117963.50 |
+-----+
```

```
chi-squared = 33.137 with 3 d.f.
probability = 0.0001

chi-squared with ties = 60.194 with 3 d.f.
probability = 0.0001
```

```
Dunn's Pairwise Comparison of iq10 by iage
(Benjamini-Hochberg)

Col Mean-|
Row Mean |          2          3          4
-----|-----
3 | -3.958265
  | 0.0001
  |
4 | -6.301218 -1.780890
  | 0.0000 0.0450
  |
5 | -6.925950 -2.974246 -1.532010
  | 0.0000 0.0022 0.0628
```

```
False Discovery Rate = 0.05
Reject Ho if p = P(Z <= |z|) <= FDR/2 with stopping rule
```

- Question – For each of the questions, 1-10, are there differences in the average response [by gender](#)?

```
. dunntest iq1, by(igender)
```

```
Warning: by() values are unlabeled, option nolabel implicit
```

```
Kruskal-Wallis equality-of-populations rank test
```

```
+-----+
```

```

+-----+
| igender | Obs | Rank Sum |
+-----+
|         1 | 497 | 248163.00 |
|         2 | 570 | 321615.00 |
+-----+

```

chi-squared = 11.781 with 1 d.f.  
probability = 0.0006

chi-squared with ties = 20.202 with 1 d.f.  
probability = 0.0001

Dunn's Pairwise Comparison of iq1 by igender  
(No adjustment)

```

Col Mean-|
Row Mean |          1
+-----+
|         2 | -4.494629
|         | 0.0000

```

alpha = 0.05  
Reject Ho if  $p = P(Z \leq |z|) \leq \alpha/2$

```
. dunntest iq2, by(igender)
```

Warning: by() values are unlabeled, option nolabel implicit

Kruskal-Wallis equality-of-populations rank test

```

+-----+
| igender | Obs | Rank Sum |
+-----+
|         1 | 497 | 245930.00 |
|         2 | 570 | 323848.00 |
+-----+

```

chi-squared = 15.032 with 1 d.f.  
probability = 0.0001

chi-squared with ties = 21.672 with 1 d.f.  
probability = 0.0001

Dunn's Pairwise Comparison of iq2 by igender  
(No adjustment)

```

Col Mean-|
Row Mean |          1
+-----+
|         2 | -4.655324
|         | 0.0000

```

alpha = 0.05  
Reject Ho if  $p = P(Z \leq |z|) \leq \alpha/2$

```
. dunntest iq3, by(igender)
```

Warning: by() values are unlabeled, option nolabel implicit

Kruskal-Wallis equality-of-populations rank test

```

+-----+
| igender | Obs | Rank Sum |
+-----+
|         1 | 497 | 254937.00 |
|         2 | 570 | 314841.00 |
+-----+

```

chi-squared = 4.340 with 1 d.f.  
probability = 0.0372

chi-squared with ties = 8.144 with 1 d.f.  
probability = 0.0043

Dunn's Pairwise Comparison of iq3 by igender  
(No adjustment)

| Col Mean- |           |
|-----------|-----------|
| Row Mean  | 1         |
| -----+    |           |
| 2         | -2.853738 |
|           | 0.0022    |

alpha = 0.05  
Reject Ho if p = P(Z <= |z|) <= alpha/2

. dunntest iq4, by(igender)

Warning: by() values are unlabeled, option nolabel implicit

Kruskal-Wallis equality-of-populations rank test

| igender | Obs | Rank Sum  |
|---------|-----|-----------|
| 1       | 497 | 245219.00 |
| 2       | 570 | 324559.00 |

chi-squared = 16.150 with 1 d.f.  
probability = 0.0001

chi-squared with ties = 21.371 with 1 d.f.  
probability = 0.0001

Dunn's Pairwise Comparison of iq4 by igender  
(No adjustment)

| Col Mean- |           |
|-----------|-----------|
| Row Mean  | 1         |
| -----+    |           |
| 2         | -4.622902 |
|           | 0.0000    |

alpha = 0.05  
Reject Ho if p = P(Z <= |z|) <= alpha/2

. dunntest iq5, by(igender)

Warning: by() values are unlabeled, option nolabel implicit

Kruskal-Wallis equality-of-populations rank test

| igender | Obs | Rank Sum  |
|---------|-----|-----------|
| 1       | 497 | 250255.00 |
| 2       | 570 | 319523.00 |

chi-squared = 9.095 with 1 d.f.  
probability = 0.0026

chi-squared with ties = 13.426 with 1 d.f.  
probability = 0.0002

Dunn's Pairwise Comparison of iq5 by igender  
(No adjustment)

| Col Mean- |           |
|-----------|-----------|
| Row Mean  | 1         |
| -----+    |           |
| 2         | -3.664079 |
|           | 0.0001    |

alpha = 0.05  
Reject Ho if p = P(Z <= |z|) <= alpha/2

. dunntest iq6, by(igender)



Warning: by() values are unlabeled, option nolabel implicit

Kruskal-Wallis equality-of-populations rank test

```

+-----+
| igender | Obs | Rank Sum |
+-----+
|         |     |           |
|         1 | 497 | 253170.50 |
|         2 | 570 | 316607.50 |
+-----+

```

chi-squared = 5.930 with 1 d.f.  
probability = 0.0149

chi-squared with ties = 8.817 with 1 d.f.  
probability = 0.0030

Dunn's Pairwise Comparison of iq6 by igender  
(No adjustment)

```

Col Mean-|
Row Mean |           1
+-----+
|         |           |
|         2 | -2.969281 |
|         |         0.0015 |

```

alpha = 0.05  
Reject Ho if  $p = P(Z \leq |z|) \leq \alpha/2$

```

.
. dunnstest iq7, by(igender)

```

Warning: by() values are unlabeled, option nolabel implicit

Kruskal-Wallis equality-of-populations rank test

```

+-----+
| igender | Obs | Rank Sum |
+-----+
|         |     |           |
|         1 | 497 | 242886.00 |
|         2 | 570 | 326892.00 |
+-----+

```

chi-squared = 20.100 with 1 d.f.  
probability = 0.0001

chi-squared with ties = 24.716 with 1 d.f.  
probability = 0.0001

Dunn's Pairwise Comparison of iq7 by igender  
(No adjustment)

```

Col Mean-|
Row Mean |           1
+-----+
|         |           |
|         2 | -4.971520 |
|         |         0.0000 |

```

alpha = 0.05  
Reject Ho if  $p = P(Z \leq |z|) \leq \alpha/2$

```

.
. dunnstest iq8, by(igender)

```

Warning: by() values are unlabeled, option nolabel implicit

Kruskal-Wallis equality-of-populations rank test

```

+-----+
| igender | Obs | Rank Sum |
+-----+
|         |     |           |
|         1 | 497 | 243180.50 |
|         2 | 570 | 326597.50 |
+-----+

```

chi-squared = 19.578 with 1 d.f.  
probability = 0.0001

chi-squared with ties = 21.691 with 1 d.f.  
probability = 0.0001

Dunn's Pairwise Comparison of iq8 by igender  
(No adjustment)

| Col Mean-   |           |
|-------------|-----------|
| Row Mean    | 1         |
| -----+----- |           |
| 2           | -4.657396 |
|             | 0.0000    |

alpha = 0.05  
Reject Ho if p = P(Z <= |z|) <= alpha/2

.  
. dunnstest iq9, by(igender)

Warning: by() values are unlabeled, option nolabel implicit

Kruskal-Wallis equality-of-populations rank test

| igender | Obs | Rank Sum  |
|---------|-----|-----------|
| 1       | 497 | 250477.00 |
| 2       | 570 | 319301.00 |

chi-squared = 8.830 with 1 d.f.  
probability = 0.0030

chi-squared with ties = 10.231 with 1 d.f.  
probability = 0.0014

Dunn's Pairwise Comparison of iq9 by igender  
(No adjustment)

| Col Mean-   |           |
|-------------|-----------|
| Row Mean    | 1         |
| -----+----- |           |
| 2           | -3.198645 |
|             | 0.0007    |

alpha = 0.05  
Reject Ho if p = P(Z <= |z|) <= alpha/2

.  
. dunnstest iq10, by(igender)

Warning: by() values are unlabeled, option nolabel implicit

Kruskal-Wallis equality-of-populations rank test

| igender | Obs | Rank Sum  |
|---------|-----|-----------|
| 1       | 497 | 246943.50 |
| 2       | 570 | 322834.50 |

chi-squared = 13.508 with 1 d.f.  
probability = 0.0002

chi-squared with ties = 24.537 with 1 d.f.  
probability = 0.0001

Dunn's Pairwise Comparison of iq10 by igender  
(No adjustment)

| Col Mean-   |           |
|-------------|-----------|
| Row Mean    | 1         |
| -----+----- |           |
| 2           | -4.953449 |

```
|      0.0000
```

```
alpha = 0.05
Reject Ho if p = P(Z <= |z|) <= alpha/2
```

- 
- Question – For each of the questions, 1-10, are there differences in the average response by income level?

```
. dunnstest iq1, by(iincome)
```

```
Warning: by() values are unlabeled, option nolabel implicit
```

```
Kruskal-Wallis equality-of-populations rank test
```

```
+-----+
| iincome | Obs | Rank Sum |
+-----+
|      1 |  85 | 39647.00 |
|      2 | 124 | 60999.00 |
|      3 | 220 |109906.00 |
|      4 | 194 |109253.00 |
|      5 | 138 | 73959.00 |
+-----+
|      6 |  81 | 47674.00 |
|      7 |  45 | 26205.00 |
|      8 |  29 | 18958.00 |
|      9 |  13 |  7766.00 |
|     10 |  22 | 13681.00 |
+-----+
|     11 | 116 | 61730.00 |
+-----+
```

```
chi-squared = 21.252 with 10 d.f.
probability = 0.0194
```

```
chi-squared with ties = 36.441 with 10 d.f.
probability = 0.0001
```

```
Dunn's Pairwise Comparison of iq1 by iincome
(No adjustment)
```

| Col Mean-<br>Row Mean | 1                   | 2                   | 3                   | 4                   | 5                   | 6                   |
|-----------------------|---------------------|---------------------|---------------------|---------------------|---------------------|---------------------|
| 2                     | -0.769253<br>0.2209 |                     |                     |                     |                     |                     |
| 3                     | -1.102569<br>0.1351 | -0.289304<br>0.3862 |                     |                     |                     |                     |
| 4                     | -3.159808<br>0.0008 | -2.632641<br>0.0042 | -2.743449<br>0.0030 |                     |                     |                     |
| 5                     | -2.141875<br>0.0161 | -1.511267<br>0.0654 | -1.422898<br>0.0774 | 1.038856<br>0.1494  |                     |                     |
| 6                     | -3.342301<br>0.0004 | -2.874429<br>0.0020 | -2.909733<br>0.0018 | -0.816141<br>0.2072 | -1.597847<br>0.0550 |                     |
| 7                     | -2.671383<br>0.0038 | -2.207428<br>0.0136 | -2.149485<br>0.0158 | -0.492410<br>0.3112 | -1.148526<br>0.1254 | 0.142490<br>0.4433  |
| 8                     | -3.700701<br>0.0001 | -3.333112<br>0.0004 | -3.315692<br>0.0005 | -1.932950<br>0.0266 | -2.450205<br>0.0071 | -1.279432<br>0.1004 |
| 9                     | -1.868475<br>0.0308 | -1.537144<br>0.0621 | -1.456172<br>0.0727 | -0.507627<br>0.3059 | -0.900035<br>0.1841 | -0.125393<br>0.4501 |
| 10                    | -2.761056<br>0.0029 | -2.386668<br>0.0085 | -2.323942<br>0.0101 | -1.108837<br>0.1338 | -1.590545<br>0.0559 | -0.588491<br>0.2781 |
| 11                    | -1.955930<br>0.0252 | -1.323354<br>0.0929 | -1.206620<br>0.1138 | 1.122513<br>0.1308  | 0.127501<br>0.4493  | 1.655509<br>0.0489  |
| Col Mean-<br>Row Mean | 7                   | 8                   | 9                   | 10                  |                     |                     |

```

-----
      8 | -1.273936
        | 0.1013
      9 | -0.203120  0.717258
        | 0.4195    0.2366
     10 | -0.645693  0.478844 -0.297344
        | 0.2592    0.3160    0.3831
     11 |  1.214096  2.488185  0.947688  1.639269
        | 0.1124    0.0064    0.1716    0.0506

```

```
alpha = 0.05
Reject Ho if p = P(Z <= |z|) <= alpha/2
```

```
. dunnstest iq2, by(iincome)
```

```
Warning: by() values are unlabeled, option nolabel implicit
```

```
Kruskal-Wallis equality-of-populations rank test
```

```

+-----+
| iincome | Obs | Rank Sum |
+-----+
| 1 | 85 | 39413.00 |
| 2 | 124 | 62680.50 |
| 3 | 220 | 113218.00 |
| 4 | 194 | 104957.50 |
| 5 | 138 | 77734.00 |
+-----+
| 6 | 81 | 46268.50 |
| 7 | 45 | 27142.00 |
| 8 | 29 | 14295.00 |
| 9 | 13 | 8091.00 |
| 10 | 22 | 12619.00 |
+-----+
| 11 | 116 | 63359.50 |
+-----+

```

```
chi-squared = 13.281 with 10 d.f.
probability = 0.2084
```

```
chi-squared with ties = 19.148 with 10 d.f.
probability = 0.0384
```

```
Dunn's Pairwise Comparison of iq2 by iincome
(No adjustment)
```

```

Col Mean-|
Row Mean |
-----
      2 | -1.156759
        | 0.1237
      3 | -1.554296 -0.317118
        | 0.0601    0.3756
      4 | -2.316595 -1.204085 -1.044061
        | 0.0103    0.1143    0.1482
      5 | -2.814820 -1.820137 -1.746089 -0.779272
        | 0.0024    0.0344    0.0404    0.2179
      6 | -2.698388 -1.792626 -1.696535 -0.889441 -0.220641
        | 0.0035    0.0365    0.0449    0.1869    0.4127
      7 | -2.947791 -2.186686 -2.108330 -1.463268 -0.904860 -0.669351
        | 0.0016    0.0144    0.0175    0.0717    0.1828    0.2516
      8 | -0.529937  0.237196  0.427915  0.941103  1.342026  1.409567
        | 0.2981    0.4063    0.3344    0.1733    0.0898    0.0793
      9 | -2.076410 -1.562379 -1.471004 -1.106612 -0.793658 -0.667291
        | 0.0189    0.0591    0.0706    0.1342    0.2137    0.2523
     10 | -1.790286 -1.147028 -1.027451 -0.564161 -0.174837 -0.038489

```

|           |  |           |           |           |           |          |          |
|-----------|--|-----------|-----------|-----------|-----------|----------|----------|
|           |  | 0.0367    | 0.1257    | 0.1521    | 0.2863    | 0.4306   | 0.4846   |
| 11        |  | -2.251971 | -1.228138 | -1.072211 | -0.172116 | 0.528550 | 0.673092 |
|           |  | 0.0122    | 0.1097    | 0.1418    | 0.4317    | 0.2986   | 0.2504   |
| Col Mean- |  |           |           |           |           |          |          |
| Row Mean  |  | 7         | 8         | 9         | 10        |          |          |
| 8         |  | 1.803556  |           |           |           |          |          |
|           |  | 0.0357    |           |           |           |          |          |
| 9         |  | -0.237949 | -1.511200 |           |           |          |          |
|           |  | 0.4060    | 0.0654    |           |           |          |          |
| 10        |  | 0.442807  | -1.111590 | 0.543469  |           |          |          |
|           |  | 0.3290    | 0.1332    | 0.2934    |           |          |          |
| 11        |  | 1.263574  | -0.999773 | 1.014893  | 0.458911  |          |          |
|           |  | 0.1032    | 0.1587    | 0.1551    | 0.3231    |          |          |

alpha = 0.05

Reject Ho if p = P(Z <= |z|) <= alpha/2

.

. dunnstest iq3, by(iincome)

Warning: by() values are unlabeled, option nolabel implicit

Kruskal-Wallis equality-of-populations rank test

| iincome | Obs | Rank Sum  |
|---------|-----|-----------|
| 1       | 85  | 38988.50  |
| 2       | 124 | 65318.50  |
| 3       | 220 | 111481.50 |
| 4       | 194 | 108216.50 |
| 5       | 138 | 75233.00  |
| 6       | 81  | 46445.50  |
| 7       | 45  | 26126.00  |
| 8       | 29  | 16689.00  |
| 9       | 13  | 8034.00   |
| 10      | 22  | 13280.50  |
| 11      | 116 | 59965.00  |

chi-squared = 13.531 with 10 d.f.  
probability = 0.1955

chi-squared with ties = 25.388 with 10 d.f.  
probability = 0.0047

Dunn's Pairwise Comparison of iq3 by iincome  
(No adjustment)

| Col Mean- |  | 1         | 2         | 3         | 4         | 5         | 6         |
|-----------|--|-----------|-----------|-----------|-----------|-----------|-----------|
| Row Mean  |  |           |           |           |           |           |           |
| 2         |  | -2.148829 |           |           |           |           |           |
|           |  | 0.0158    |           |           |           |           |           |
| 3         |  | -1.672250 | 0.792784  |           |           |           |           |
|           |  | 0.0472    | 0.2140    |           |           |           |           |
| 4         |  | -3.387523 | -1.200612 | -2.305484 |           |           |           |
|           |  | 0.0004    | 0.1150    | 0.0106    |           |           |           |
| 5         |  | -2.787910 | -0.661150 | -1.573197 | 0.504950  |           |           |
|           |  | 0.0027    | 0.2543    | 0.0578    | 0.3068    |           |           |
| 6         |  | -3.283862 | -1.451113 | -2.280115 | -0.523645 | -0.896635 |           |
|           |  | 0.0005    | 0.0734    | 0.0113    | 0.3003    | 0.1850    |           |
| 7         |  | -2.938900 | -1.374539 | -2.006238 | -0.611462 | -0.916926 | -0.171575 |
|           |  | 0.0016    | 0.0846    | 0.0224    | 0.2704    | 0.1796    | 0.4319    |
| 8         |  | -2.414087 | -1.049909 | -1.546854 | -0.394415 | -0.659672 | -0.042756 |

|           |           |           |           |           |           |           |        |
|-----------|-----------|-----------|-----------|-----------|-----------|-----------|--------|
|           |           | 0.0079    | 0.1469    | 0.0609    | 0.3466    | 0.2547    | 0.4829 |
| 9         | -2.377882 | -1.391143 | -1.732772 | -0.933760 | -1.115905 | -0.663510 |        |
|           |           | 0.0087    | 0.0821    | 0.0416    | 0.1752    | 0.1322    | 0.2535 |
| 10        | -2.693915 | -1.477507 | -1.926749 | -0.905783 | -1.132569 | -0.559433 |        |
|           |           | 0.0035    | 0.0698    | 0.0270    | 0.1825    | 0.1287    | 0.2879 |
| 11        | -1.813516 | 0.338009  | -0.395350 | 1.548125  | 0.996072  | 1.733268  |        |
|           |           | 0.0349    | 0.3677    | 0.3463    | 0.0608    | 0.1596    | 0.0415 |
| Col Mean- |           |           |           |           |           |           |        |
| Row Mean  |           | 7         | 8         | 9         | 10        |           |        |
| 8         | 0.095106  |           |           |           |           |           |        |
|           | 0.4621    |           |           |           |           |           |        |
| 9         | -0.528284 | -0.566220 |           |           |           |           |        |
|           | 0.2987    | 0.2856    |           |           |           |           |        |
| 10        | -0.394380 | -0.442980 | 0.182222  |           |           |           |        |
|           | 0.3467    | 0.3289    | 0.4277    |           |           |           |        |
| 11        | 1.610698  | 1.253413  | 1.535893  | 1.657645  |           |           |        |
|           | 0.0536    | 0.1050    | 0.0623    | 0.0487    |           |           |        |

alpha = 0.05

Reject Ho if  $p = P(Z \leq |z|) \leq \alpha/2$

.

. dunnstest iq4, by(iincome)

Warning: by() values are unlabeled, option nolabel implicit

Kruskal-Wallis equality-of-populations rank test

| iincome | Obs | Rank Sum  |
|---------|-----|-----------|
| 1       | 85  | 37107.00  |
| 2       | 124 | 65210.00  |
| 3       | 220 | 110440.00 |
| 4       | 194 | 111545.50 |
| 5       | 138 | 75994.50  |
| 6       | 81  | 42547.50  |
| 7       | 45  | 27401.50  |
| 8       | 29  | 15829.50  |
| 9       | 13  | 7802.00   |
| 10      | 22  | 13522.00  |
| 11      | 116 | 62378.50  |

chi-squared = 19.683 with 10 d.f.  
probability = 0.0324

chi-squared with ties = 26.046 with 10 d.f.  
probability = 0.0037

Dunn's Pairwise Comparison of iq4 by iincome  
(No adjustment)

| Col Mean- | 1         | 2         | 3         | 4        | 5        | 6 |
|-----------|-----------|-----------|-----------|----------|----------|---|
| Row Mean  |           |           |           |          |          |   |
| 2         | -2.368171 |           |           |          |          |   |
|           | 0.0089    |           |           |          |          |   |
| 3         | -1.912976 | 0.794063  |           |          |          |   |
|           | 0.0279    | 0.2136    |           |          |          |   |
| 4         | -3.972534 | -1.593812 | -2.765956 |          |          |   |
|           | 0.0000    | 0.0555    | 0.0028    |          |          |   |
| 5         | -3.089953 | -0.748099 | -1.673598 | 0.814298 |          |   |
|           | 0.0010    | 0.2272    | 0.0471    | 0.2077   |          |   |
| 6         | -2.133003 | 0.015921  | -0.668591 | 1.402405 | 0.677582 |   |

|           |           |           |           |           |           |           |        |
|-----------|-----------|-----------|-----------|-----------|-----------|-----------|--------|
|           |           | 0.0165    | 0.4936    | 0.2519    | 0.0804    | 0.2490    |        |
| 7         | -3.490216 | -1.781082 | -2.439558 | -0.765840 | -1.266400 | -1.679380 |        |
|           |           | 0.0002    | 0.0374    | 0.0074    | 0.2219    | 0.1027    | 0.0465 |
| 8         | -1.897109 | -0.361180 | -0.828471 | 0.546218  | 0.088444  | -0.354785 |        |
|           |           | 0.0289    | 0.3590    | 0.2037    | 0.2925    | 0.4648    | 0.3614 |
| 9         | -2.050700 | -0.950966 | -1.283692 | -0.328050 | -0.636509 | -0.935496 |        |
|           |           | 0.0201    | 0.1708    | 0.0996    | 0.3714    | 0.2622    | 0.1748 |
| 10        | -2.779079 | -1.432053 | -1.880365 | -0.658084 | -1.039898 | -1.387458 |        |
|           |           | 0.0027    | 0.0761    | 0.0300    | 0.2552    | 0.1492    | 0.0827 |
| 11        | -2.645686 | -0.342701 | -1.162901 | 1.184141  | 0.383446  | -0.321426 |        |
|           |           | 0.0041    | 0.3659    | 0.1224    | 0.1182    | 0.3507    | 0.3739 |
| Col Mean- |           |           |           |           |           |           |        |
| Row Mean  |           | 7         | 8         | 9         | 10        |           |        |
| 8         | 0.988807  |           |           |           |           |           |        |
|           | 0.1614    |           |           |           |           |           |        |
| 9         | 0.103952  | -0.607388 |           |           |           |           |        |
|           | 0.4586    | 0.2718    |           |           |           |           |        |
| 10        | -0.081994 | -0.908257 | -0.154540 |           |           |           |        |
|           | 0.4673    | 0.1819    | 0.4386    |           |           |           |        |
| 11        | 1.512891  | 0.145623  | 0.796518  | 1.234306  |           |           |        |
|           | 0.0652    | 0.4421    | 0.2129    | 0.1085    |           |           |        |

alpha = 0.05  
 Reject Ho if  $p = P(Z \leq |z|) \leq \alpha/2$

```
. dunnstest iq5, by(iincome)
```

Warning: by() values are unlabeled, option nolabel implicit

Kruskal-Wallis equality-of-populations rank test

| iincome | Obs | Rank Sum  |
|---------|-----|-----------|
| 1       | 85  | 43091.50  |
| 2       | 124 | 66453.50  |
| 3       | 220 | 109374.50 |
| 4       | 194 | 106261.50 |
| 5       | 138 | 75463.00  |
| 6       | 81  | 44934.00  |
| 7       | 45  | 24609.50  |
| 8       | 29  | 17201.00  |
| 9       | 13  | 8082.00   |
| 10      | 22  | 13958.00  |
| 11      | 116 | 60349.50  |

chi-squared = 9.564 with 10 d.f.  
 probability = 0.4796

chi-squared with ties = 14.118 with 10 d.f.  
 probability = 0.1677

Dunn's Pairwise Comparison of iq5 by iincome  
 (No adjustment)

| Col Mean- | 1         | 2         | 3         | 4 | 5 | 6 |
|-----------|-----------|-----------|-----------|---|---|---|
| Row Mean  |           |           |           |   |   |   |
| 2         | -0.810736 |           |           |   |   |   |
|           | 0.2088    |           |           |   |   |   |
| 3         | 0.302602  | 1.360806  |           |   |   |   |
|           | 0.3811    | 0.0868    |           |   |   |   |
| 4         | -1.236093 | -0.405473 | -2.024892 |   |   |   |

|           |           |           |           |           |           |           |
|-----------|-----------|-----------|-----------|-----------|-----------|-----------|
|           |           | 0.1082    | 0.3426    | 0.0214    |           |           |
| 5         | -1.140193 | -0.347880 | -1.803628 | 0.032089  |           |           |
|           | 0.1271    | 0.3640    | 0.0356    | 0.4872    |           |           |
| 6         | -1.213243 | -0.519526 | -1.746860 | -0.208654 | -0.222731 |           |
|           | 0.1125    | 0.3017    | 0.0403    | 0.4174    | 0.4119    |           |
| 7         | -0.853708 | -0.248352 | -1.198176 | 0.020538  | -0.001021 | 0.166739  |
|           | 0.1966    | 0.4019    | 0.1154    | 0.4918    | 0.4996    | 0.4338    |
| 8         | -1.579954 | -1.093750 | -1.915503 | -0.899027 | -0.893698 | -0.699570 |
|           | 0.0571    | 0.1370    | 0.0277    | 0.1843    | 0.1857    | 0.2421    |
| 9         | -1.518954 | -1.160057 | -1.720222 | -1.017718 | -1.017309 | -0.883481 |
|           | 0.0644    | 0.1230    | 0.0427    | 0.1544    | 0.1545    | 0.1885    |
| 10        | -2.101410 | -1.679350 | -2.420832 | -1.519726 | -1.504827 | -1.307239 |
|           | 0.0178    | 0.0465    | 0.0077    | 0.0643    | 0.0662    | 0.0956    |
| 11        | -0.367139 | 0.478014  | -0.793637 | 0.923288  | 0.831911  | 0.939016  |
|           | 0.3568    | 0.3163    | 0.2137    | 0.1779    | 0.2027    | 0.1739    |
| Col Mean- |           |           |           |           |           |           |
| Row Mean  |           | 7         | 8         | 9         | 10        |           |
| 8         | -0.765919 |           |           |           |           |           |
|           | 0.2219    |           |           |           |           |           |
| 9         | -0.936777 | -0.337291 |           |           |           |           |
|           | 0.1744    | 0.3679    |           |           |           |           |
| 10        | -1.327258 | -0.576151 | -0.143834 |           |           |           |
|           | 0.0922    | 0.2823    | 0.4428    |           |           |           |
| 11        | 0.597686  | 1.384077  | 1.367391  | 1.936218  |           |           |
|           | 0.2750    | 0.0832    | 0.0858    | 0.0264    |           |           |

alpha = 0.05  
 Reject Ho if  $p = P(Z \leq |z|) \leq \alpha/2$

.  
 . dunntest iq6, by(iincome)

Warning: by() values are unlabeled, option nolabel implicit

Kruskal-Wallis equality-of-populations rank test

| iincome | Obs | Rank Sum  |
|---------|-----|-----------|
| 1       | 85  | 39943.00  |
| 2       | 124 | 65934.00  |
| 3       | 220 | 112644.00 |
| 4       | 194 | 111196.50 |
| 5       | 138 | 76173.50  |
| 6       | 81  | 42432.00  |
| 7       | 45  | 27899.50  |
| 8       | 29  | 16523.00  |
| 9       | 13  | 7017.00   |
| 10      | 22  | 12425.00  |
| 11      | 116 | 57590.50  |

chi-squared = 14.334 with 10 d.f.  
 probability = 0.1583

chi-squared with ties = 21.312 with 10 d.f.  
 probability = 0.0190

Dunn's Pairwise Comparison of iq6 by iincome  
 (No adjustment)

| Col Mean- | 1         | 2 | 3 | 4 | 5 | 6 |
|-----------|-----------|---|---|---|---|---|
| Row Mean  |           |   |   |   |   |   |
| 2         | -1.736761 |   |   |   |   |   |



|           |           |           |           |           |           |           |  |  |  |  |
|-----------|-----------|-----------|-----------|-----------|-----------|-----------|--|--|--|--|
|           |           | 0.0412    |           |           |           |           |  |  |  |  |
| 3         | -1.304384 | 0.694423  |           |           |           |           |  |  |  |  |
|           | 0.0961    | 0.2437    |           |           |           |           |  |  |  |  |
| 4         | -3.141146 | -1.426563 | -2.457107 |           |           |           |  |  |  |  |
|           | 0.0008    | 0.0769    | 0.0070    |           |           |           |  |  |  |  |
| 5         | -2.355036 | -0.647742 | -1.456204 | 0.753132  |           |           |  |  |  |  |
|           | 0.0093    | 0.2586    | 0.0727    | 0.2257    |           |           |  |  |  |  |
| 6         | -1.374388 | 0.218080  | -0.360277 | 1.475366  | 0.795202  |           |  |  |  |  |
|           | 0.0847    | 0.4137    | 0.3593    | 0.0701    | 0.2132    |           |  |  |  |  |
| 7         | -3.220984 | -2.006780 | -2.611245 | -1.119447 | -1.567548 | -2.045979 |  |  |  |  |
|           | 0.0006    | 0.0224    | 0.0045    | 0.1315    | 0.0585    | 0.0204    |  |  |  |  |
| 8         | -1.837011 | -0.729574 | -1.156479 | 0.067955  | -0.344334 | -0.839400 |  |  |  |  |
|           | 0.0331    | 0.2328    | 0.1237    | 0.4729    | 0.3653    | 0.2006    |  |  |  |  |
| 9         | -0.928093 | -0.109172 | -0.384708 | 0.461416  | 0.166563  | -0.210799 |  |  |  |  |
|           | 0.1767    | 0.4565    | 0.3502    | 0.3223    | 0.4339    | 0.4165    |  |  |  |  |
| 10        | -1.569049 | -0.565228 | -0.933516 | 0.147834  | -0.220464 | -0.673484 |  |  |  |  |
|           | 0.0583    | 0.2860    | 0.1753    | 0.4412    | 0.4128    | 0.2503    |  |  |  |  |
| 11        | -0.735847 | 1.079976  | 0.536170  | 2.586049  | 1.743757  | 0.748257  |  |  |  |  |
|           | 0.2309    | 0.1401    | 0.2959    | 0.0049    | 0.0406    | 0.2272    |  |  |  |  |
| Col Mean- |           |           |           |           |           |           |  |  |  |  |
| Row Mean  | 7         | 8         | 9         | 10        |           |           |  |  |  |  |
| 8         | 0.834645  |           |           |           |           |           |  |  |  |  |
|           | 0.2020    |           |           |           |           |           |  |  |  |  |
| 9         | 1.008073  | 0.355517  |           |           |           |           |  |  |  |  |
|           | 0.1567    | 0.3611    |           |           |           |           |  |  |  |  |
| 10        | 0.839834  | 0.069777  | -0.282811 |           |           |           |  |  |  |  |
|           | 0.2005    | 0.4722    | 0.3887    |           |           |           |  |  |  |  |
| 11        | 2.782937  | 1.396782  | 0.585780  | 1.162216  |           |           |  |  |  |  |
|           | 0.0027    | 0.0812    | 0.2790    | 0.1226    |           |           |  |  |  |  |

alpha = 0.05  
 Reject Ho if  $p = P(Z \leq |z|) \leq \alpha/2$

```
. dunnstest iq7, by(iincome)
```

Warning: by() values are unlabeled, option nolabel implicit

Kruskal-Wallis equality-of-populations rank test

| iincome | Obs | Rank Sum  |
|---------|-----|-----------|
| 1       | 85  | 40655.00  |
| 2       | 124 | 63730.00  |
| 3       | 220 | 112270.00 |
| 4       | 194 | 105789.00 |
| 5       | 138 | 76798.00  |
| 6       | 81  | 41235.00  |
| 7       | 45  | 24842.00  |
| 8       | 29  | 18999.00  |
| 9       | 13  | 8325.00   |
| 10      | 22  | 13773.00  |
| 11      | 116 | 63362.00  |

chi-squared = 14.459 with 10 d.f.  
 probability = 0.1531

chi-squared with ties = 17.779 with 10 d.f.  
 probability = 0.0588

Dunn's Pairwise Comparison of iq7 by iincome  
(No adjustment)

| Col Mean-<br>Row Mean | 1                   | 2                   | 3                   | 4                   | 5                   | 6                   |
|-----------------------|---------------------|---------------------|---------------------|---------------------|---------------------|---------------------|
| 2                     | -0.911185<br>0.1811 |                     |                     |                     |                     |                     |
| 3                     | -0.902310<br>0.1834 | 0.116431<br>0.4537  |                     |                     |                     |                     |
| 4                     | -1.853772<br>0.0319 | -0.981248<br>0.1632 | -1.278245<br>0.1006 |                     |                     |                     |
| 5                     | -2.041196<br>0.0206 | -1.237557<br>0.1079 | -1.530584<br>0.0629 | -0.362009<br>0.3587 |                     |                     |
| 6                     | -0.713304<br>0.2378 | 0.122853<br>0.4511  | 0.034446<br>0.4863  | 0.985495<br>0.1622  | 1.219413<br>0.1113  |                     |
| 7                     | -1.439516<br>0.0750 | -0.787636<br>0.2155 | -0.917725<br>0.1794 | -0.146588<br>0.4417 | 0.093548<br>0.4627  | -0.831651<br>0.2028 |
| 8                     | -2.959064<br>0.0015 | -2.463005<br>0.0069 | -2.637831<br>0.0042 | -1.985144<br>0.0236 | -1.737404<br>0.0412 | -2.428826<br>0.0076 |
| 9                     | -1.958548<br>0.0251 | -1.560599<br>0.0593 | -1.639754<br>0.0505 | -1.194228<br>0.1162 | -1.040342<br>0.1491 | -1.581461<br>0.0569 |
| 10                    | -2.222639<br>0.0131 | -1.743556<br>0.0406 | -1.862341<br>0.0313 | -1.291486<br>0.0983 | -1.089991<br>0.1379 | -1.750747<br>0.0400 |
| 11                    | -1.712027<br>0.0434 | -0.899033<br>0.1843 | -1.126019<br>0.1301 | -0.028207<br>0.4887 | 0.293755<br>0.3845  | -0.923223<br>0.1779 |
| Col Mean-<br>Row Mean | 7                   | 8                   | 9                   | 10                  |                     |                     |
| 8                     | -1.557863<br>0.0596 |                     |                     |                     |                     |                     |
| 9                     | -1.009557<br>0.1564 | 0.159054<br>0.4368  |                     |                     |                     |                     |
| 10                    | -1.023591<br>0.1530 | 0.370267<br>0.3556  | 0.147496<br>0.4414  |                     |                     |                     |
| 11                    | 0.119255<br>0.4525  | 1.887710<br>0.0295  | 1.158465<br>0.1233  | 1.235174<br>0.1084  |                     |                     |

alpha = 0.05  
Reject Ho if  $p = P(Z \leq |z|) \leq \alpha/2$

```
. dunnstest iq8, by(iincome)
```

Warning: by() values are unlabeled, option nolabel implicit

Kruskal-Wallis equality-of-populations rank test

| iincome | Obs | Rank Sum  |
|---------|-----|-----------|
| 1       | 85  | 44398.00  |
| 2       | 124 | 67446.50  |
| 3       | 220 | 114674.50 |
| 4       | 194 | 109552.50 |
| 5       | 138 | 77545.00  |
| 6       | 81  | 39286.00  |
| 7       | 45  | 27072.00  |
| 8       | 29  | 11459.50  |
| 9       | 13  | 7777.00   |
| 10      | 22  | 11179.00  |
| 11      | 116 | 59388.00  |

chi-squared = 15.098 with 10 d.f.

```

probability =      0.1285
chi-squared with ties =      16.728 with 10 d.f.
probability =      0.0806

```

Dunn's Pairwise Comparison of iq8 by iincome  
(No adjustment)

| Col Mean-<br>Row Mean | 1                   | 2                   | 3                   | 4                   | 5                   | 6                   |
|-----------------------|---------------------|---------------------|---------------------|---------------------|---------------------|---------------------|
| 2                     | -0.523795<br>0.3002 |                     |                     |                     |                     |                     |
| 3                     | 0.028930<br>0.4885  | 0.689738<br>0.2452  |                     |                     |                     |                     |
| 4                     | -1.112733<br>0.1329 | -0.617347<br>0.2685 | -1.507100<br>0.0659 |                     |                     |                     |
| 5                     | -0.980783<br>0.1633 | -0.496797<br>0.3097 | -1.279359<br>0.1004 | 0.085372<br>0.4660  |                     |                     |
| 6                     | 0.820893<br>0.2059  | 1.408492<br>0.0795  | 0.952324<br>0.1705  | 2.057639<br>0.0198  | 1.876777<br>0.0303  |                     |
| 7                     | -1.468715<br>0.0710 | -1.132022<br>0.1288 | -1.677545<br>0.0467 | -0.761682<br>0.2231 | -0.789533<br>0.2149 | -2.141891<br>0.0161 |
| 8                     | 2.019931<br>0.0217  | 2.463517<br>0.0069  | 2.180125<br>0.0146  | 2.908858<br>0.0018  | 2.788476<br>0.0026  | 1.418337<br>0.0780  |
| 9                     | -0.870561<br>0.1920 | -0.636301<br>0.2623 | -0.921258<br>0.1785 | -0.399729<br>0.3447 | -0.427500<br>0.3345 | -1.294341<br>0.0978 |
| 10                    | 0.202668<br>0.4197  | 0.528388<br>0.2986  | 0.200283<br>0.4206  | 0.858878<br>0.1952  | 0.800248<br>0.2118  | -0.328534<br>0.3713 |
| 11                    | 0.247939<br>0.4021  | 0.845071<br>0.1990  | 0.276314<br>0.3912  | 1.534811<br>0.0624  | 1.354597<br>0.0878  | -0.635813<br>0.2624 |
| Col Mean-<br>Row Mean | 7                   | 8                   | 9                   | 10                  |                     |                     |
| 8                     | 2.961248<br>0.0015  |                     |                     |                     |                     |                     |
| 9                     | 0.036549<br>0.4854  | -2.078189<br>0.0188 |                     |                     |                     |                     |
| 10                    | 1.227169<br>0.1099  | -1.364937<br>0.0861 | 0.879687<br>0.1895  |                     |                     |                     |
| 11                    | 1.743327<br>0.0406  | -1.921793<br>0.0273 | 1.007449<br>0.1569  | -0.056245<br>0.4776 |                     |                     |

```

alpha = 0.05
Reject Ho if p = P(Z <= |z|) <= alpha/2

```

```
. dunnstest iq9, by(iincome)
```

Warning: by() values are unlabeled, option nolabel implicit

Kruskal-Wallis equality-of-populations rank test

| iincome | Obs | Rank Sum  |
|---------|-----|-----------|
| 1       | 85  | 42614.00  |
| 2       | 124 | 71402.00  |
| 3       | 220 | 115021.00 |
| 4       | 194 | 107204.00 |
| 5       | 138 | 73164.00  |
| 6       | 81  | 36234.00  |
| 7       | 45  | 25791.00  |
| 8       | 29  | 18002.00  |
| 9       | 13  | 6129.00   |

```

|      10 | 22 | 12144.00 |
|-----+-----+-----|
|      11 | 116 | 62073.00 |
+-----+-----+-----+

```

chi-squared = 14.299 with 10 d.f.  
probability = 0.1598

chi-squared with ties = 16.568 with 10 d.f.  
probability = 0.0845

Dunn's Pairwise Comparison of iq9 by iincome  
(No adjustment)

| Col Mean-<br>Row Mean | 1                   | 2                   | 3                   | 4                   | 5                   | 6                   |
|-----------------------|---------------------|---------------------|---------------------|---------------------|---------------------|---------------------|
| 2                     | -1.847551<br>0.0323 |                     |                     |                     |                     |                     |
| 3                     | -0.587541<br>0.2784 | 1.648615<br>0.0496  |                     |                     |                     |                     |
| 4                     | -1.376451<br>0.0843 | 0.705584<br>0.2402  | -1.056011<br>0.1455 |                     |                     |                     |
| 5                     | -0.730439<br>0.2326 | 1.288633<br>0.0988  | -0.236466<br>0.4065 | 0.703374<br>0.2409  |                     |                     |
| 6                     | 1.214944<br>0.1122  | 3.141555<br>0.0008  | 2.028888<br>0.0212  | 2.779463<br>0.0027  | 2.067305<br>0.0194  |                     |
| 7                     | -1.360262<br>0.0869 | 0.053977<br>0.4785  | -1.074127<br>0.1414 | -0.433524<br>0.3323 | -0.874138<br>0.1910 | -2.363446<br>0.0091 |
| 8                     | -1.939659<br>0.0262 | -0.760958<br>0.2233 | -1.731626<br>0.0417 | -1.195867<br>0.1159 | -1.548947<br>0.0607 | -2.799362<br>0.0026 |
| 9                     | 0.350465<br>0.3630  | 1.250438<br>0.1056  | 0.628553<br>0.2648  | 0.989247<br>0.1613  | 0.706893<br>0.2398  | -0.282083<br>0.3889 |
| 10                    | -0.739751<br>0.2297 | 0.359696<br>0.3595  | -0.455786<br>0.3243 | 0.009284<br>0.4963  | -0.332100<br>0.3699 | -1.520705<br>0.0642 |
| 11                    | -0.826199<br>0.2043 | 1.100886<br>0.1355  | -0.374111<br>0.3542 | 0.520401<br>0.3014  | -0.136936<br>0.4455 | -2.117528<br>0.0171 |
| Col Mean-<br>Row Mean | 7                   | 8                   | 9                   | 10                  |                     |                     |
| 8                     | -0.698600<br>0.2424 |                     |                     |                     |                     |                     |
| 9                     | 1.127888<br>0.1297  | 1.562424<br>0.0591  |                     |                     |                     |                     |
| 10                    | 0.283759<br>0.3883  | 0.849481<br>0.1978  | -0.804181<br>0.2106 |                     |                     |                     |
| 11                    | 0.756224<br>0.2248  | 1.440971<br>0.0748  | -0.760168<br>0.2236 | 0.253676<br>0.3999  |                     |                     |

alpha = 0.05  
Reject Ho if p = P(Z <= |z|) <= alpha/2

```
. dunnstest iq10, by(iincome)
```

Warning: by() values are unlabeled, option nolabel implicit

Kruskal-Wallis equality-of-populations rank test

```

+-----+
| iincome | Obs | Rank Sum |
+-----+-----+-----+
|      1 | 85 | 40198.50 |
|      2 | 124 | 64675.00 |
|      3 | 220 | 115226.00 |
|      4 | 194 | 105304.00 |

```

|    |     |          |
|----|-----|----------|
| 5  | 138 | 75828.00 |
| 6  | 81  | 43222.00 |
| 7  | 45  | 27158.00 |
| 8  | 29  | 17443.00 |
| 9  | 13  | 7630.50  |
| 10 | 22  | 12461.00 |
| 11 | 116 | 60632.00 |

chi-squared = 8.754 with 10 d.f.  
probability = 0.5556

chi-squared with ties = 15.902 with 10 d.f.  
probability = 0.1025

Dunn's Pairwise Comparison of iq10 by iincome  
(No adjustment)

| Col Mean-<br>Row Mean | 1                   | 2                   | 3                   | 4                   | 5                   | 6                   |
|-----------------------|---------------------|---------------------|---------------------|---------------------|---------------------|---------------------|
| 2                     | -1.510986<br>0.0654 |                     |                     |                     |                     |                     |
| 3                     | -1.740758<br>0.0409 | -0.084983<br>0.4661 |                     |                     |                     |                     |
| 4                     | -2.349653<br>0.0094 | -0.807641<br>0.2096 | -0.845934<br>0.1988 |                     |                     |                     |
| 5                     | -2.428329<br>0.0076 | -0.986350<br>0.1620 | -1.036053<br>0.1501 | -0.262123<br>0.3966 |                     |                     |
| 6                     | -1.709198<br>0.0437 | -0.368355<br>0.3563 | -0.331484<br>0.3701 | 0.304134<br>0.3805  | 0.495983<br>0.3100  |                     |
| 7                     | -3.098024<br>0.0010 | -2.059211<br>0.0197 | -2.132063<br>0.0165 | -1.604670<br>0.0543 | -1.376629<br>0.0843 | -1.644439<br>0.0500 |
| 8                     | -2.614557<br>0.0045 | -1.694358<br>0.0451 | -1.720791<br>0.0426 | -1.289040<br>0.0987 | -1.113423<br>0.1328 | -1.371867<br>0.0851 |
| 9                     | -1.674775<br>0.0470 | -0.980992<br>0.1633 | -0.968521<br>0.1664 | -0.674109<br>0.2501 | -0.565066<br>0.2860 | -0.781047<br>0.2174 |
| 10                    | -1.709276<br>0.0437 | -0.847650<br>0.1983 | -0.834294<br>0.2021 | -0.458910<br>0.3231 | -0.322558<br>0.3735 | -0.596764<br>0.2753 |
| 11                    | -1.524450<br>0.0637 | -0.037823<br>0.4849 | 0.040590<br>0.4838  | 0.749543<br>0.2268  | 0.930124<br>0.1762  | 0.329695<br>0.3708  |
| Col Mean-<br>Row Mean | 7                   | 8                   | 9                   | 10                  |                     |                     |
| 8                     | 0.037254<br>0.4851  |                     |                     |                     |                     |                     |
| 9                     | 0.229874<br>0.4091  | 0.190278<br>0.4245  |                     |                     |                     |                     |
| 10                    | 0.623759<br>0.2664  | 0.542557<br>0.2937  | 0.256952<br>0.3986  |                     |                     |                     |
| 11                    | 2.012741<br>0.0221  | 1.659858<br>0.0485  | 0.961094<br>0.1683  | 0.822269<br>0.2055  |                     |                     |

alpha = 0.05  
Reject Ho if  $p = P(Z \leq |z|) \leq \alpha/2$

- Question: For each of the questions, are there differences in the average response among regions?

```
. dunnstest iq1, by(iregion)
```

Warning: by() values are unlabeled, option nolabel implicit

Kruskal-Wallis equality-of-populations rank test

```

+-----+
| iregion | Obs | Rank Sum |
+-----+
|         |     |           |
|         |     |           |
|         |     |           |
|         |     |           |
|         |     |           |
|         |     |           |
|         |     |           |
|         |     |           |
|         |     |           |
+-----+

```

chi-squared = 2.163 with 8 d.f.  
probability = 0.9756

chi-squared with ties = 3.726 with 8 d.f.  
probability = 0.8809

Dunn's Pairwise Comparison of iql by iregion  
(No adjustment)

```

Col Mean-|
Row Mean |         1         2         3         4         5         6
+-----+
2 | 0.042474
  | 0.4831
3 | 0.269342  0.316211
  | 0.3938    0.3759
4 | 0.888316  1.052593  0.872168
  | 0.1872    0.1463    0.1916
5 | 1.026723  1.386337  1.206927 -0.042564
  | 0.1523    0.0828    0.1137    0.4830
6 | 0.457191  0.530134  0.302107 -0.505166 -0.597188
  | 0.3238    0.2980    0.3813    0.3067    0.2752
7 | 0.677356  0.837319  0.615384 -0.329566 -0.387744  0.223575
  | 0.2491    0.2012    0.2692    0.3709    0.3491    0.4115
8 | 0.660596  0.791341  0.580345 -0.294747 -0.330689  0.227308
  | 0.2544    0.2144    0.2808    0.3841    0.3704    0.4101
9 | 0.268329  0.314656 -0.001383 -0.872573 -1.206703 -0.302920
  | 0.3942    0.3765    0.4994    0.1914    0.1138    0.3810
Col Mean-|
Row Mean |         7         8
+-----+
8 | 0.018968
  | 0.4924
9 | -0.615972 -0.580954
  | 0.2690    0.2806

```

alpha = 0.05  
Reject Ho if p = P(Z <= |z|) <= alpha/2

```
. dunnstest iq2, by(iregion)
```

Warning: by() values are unlabeled, option nolabel implicit

Kruskal-Wallis equality-of-populations rank test

```

+-----+
| iregion | Obs | Rank Sum |
+-----+
|         |     |           |
|         |     |           |
+-----+

```

```

|      3 | 190 | 100366.50 |
|      4 |  60 |  31012.00 |
|      5 | 196 | 100609.50 |
+-----+
|      6 |  74 |  36875.00 |
|      7 | 102 |  54881.50 |
|      8 |  77 |  44283.00 |
|      9 | 189 |  99614.50 |
+-----+

```

```

chi-squared =    4.999 with 8 d.f.
probability =    0.7577

```

```

chi-squared with ties =    7.247 with 8 d.f.
probability =    0.5102

```

Dunn's Pairwise Comparison of iq2 by iregion  
(No adjustment)

```

Col Mean-|
Row Mean |      1      2      3      4      5      6
+-----+
  2 | -1.401196
    |    0.0806
  3 | -0.673408  1.128301
    |    0.2503    0.1296
  4 | -0.333024  1.113944  0.302762
    |    0.3696    0.1327    0.3810
  5 | -0.313209  1.646623  0.577895  0.094889
    |    0.3771    0.0498    0.2817    0.4622
  6 |  0.044227  1.689339  0.860804  0.420891  0.433300
    |    0.4824    0.0456    0.1947    0.3369    0.3324
  7 | -0.841525  0.686424 -0.314897 -0.513148 -0.798495 -1.025584
    |    0.2000    0.2462    0.3764    0.3039    0.2123    0.1525
  8 | -1.590200 -0.372086 -1.366818 -1.332635 -1.810343 -1.858851
    |    0.0559    0.3549    0.0858    0.0913    0.0351    0.0315
  9 | -0.644434  1.167399  0.045410 -0.271087 -0.531360 -0.826147
    |    0.2596    0.1215    0.4819    0.3932    0.2976    0.2044
Col Mean-|
Row Mean |      7      8
+-----+
  8 | -0.967067
    |    0.1668
  9 |  0.352577  1.400283
    |    0.3622    0.0807

```

```

alpha =    0.05
Reject Ho if p = P(Z <= |z|) <= alpha/2

```

```

. dunnstest iq3, by(iregion)

```

```

Warning: by() values are unlabeled, option nolabel implicit

```

```

Kruskal-Wallis equality-of-populations rank test

```

```

+-----+
| iregion | Obs | Rank Sum |
+-----+
|      1 |  47 | 24663.50 |
|      2 | 123 | 68571.50 |
|      3 | 190 | 103626.00 |
|      4 |  60 | 29282.00 |
|      5 | 196 | 101056.00 |
+-----+
|      6 |  74 | 36988.00 |
|      7 | 102 | 51807.00 |
|      8 |  77 | 42563.50 |
|      9 | 189 | 101653.50 |
+-----+

```

```

chi-squared = 4.863 with 8 d.f.
probability = 0.7721

chi-squared with ties = 9.241 with 8 d.f.
probability = 0.3224

```

Dunn's Pairwise Comparison of iq3 by iregion  
(No adjustment)

| Col Mean-<br>Row Mean | 1                   | 2                  | 3                   | 4                   | 5                   | 6                   |
|-----------------------|---------------------|--------------------|---------------------|---------------------|---------------------|---------------------|
| 2                     | -0.861221<br>0.1946 |                    |                     |                     |                     |                     |
| 3                     | -0.571695<br>0.2838 | 0.471363<br>0.3187 |                     |                     |                     |                     |
| 4                     | 0.850479<br>0.1975  | 1.989908<br>0.0233 | 1.747619<br>0.0403  |                     |                     |                     |
| 5                     | 0.254530<br>0.3995  | 1.643252<br>0.0502 | 1.320843<br>0.0933  | -0.842644<br>0.1997 |                     |                     |
| 6                     | 0.602672<br>0.2734  | 1.767949<br>0.0385 | 1.500029<br>0.0668  | -0.306543<br>0.3796 | 0.520904<br>0.3012  |                     |
| 7                     | 0.431017<br>0.3332  | 1.670219<br>0.0474 | 1.377797<br>0.0841  | -0.551195<br>0.2908 | 0.283785<br>0.3883  | -0.238533<br>0.4057 |
| 8                     | -0.682835<br>0.2474 | 0.146504<br>0.4418 | -0.246206<br>0.4028 | -1.696032<br>0.0449 | -1.247144<br>0.1062 | -1.466964<br>0.0712 |
| 9                     | -0.362407<br>0.3585 | 0.764912<br>0.2222 | 0.331578<br>0.3701  | -1.516629<br>0.0647 | -0.984934<br>0.1623 | -1.250510<br>0.1056 |
| Col Mean-<br>Row Mean | 7                   | 8                  |                     |                     |                     |                     |
| 8                     | -1.340578<br>0.0900 |                    |                     |                     |                     |                     |
| 9                     | -1.099269<br>0.1358 | 0.497979<br>0.3092 |                     |                     |                     |                     |

```

alpha = 0.05
Reject Ho if p = P(Z <= |z|) <= alpha/2

```

```

. dunntest iq4, by(iregion)

```

Warning: by() values are unlabeled, option nolabel implicit

Kruskal-Wallis equality-of-populations rank test

| iregion | Obs | Rank Sum |
|---------|-----|----------|
| 1       | 47  | 23898.00 |
| 2       | 123 | 70371.00 |
| 3       | 190 | 99803.00 |
| 4       | 60  | 29574.00 |
| 5       | 196 | 99327.50 |
| 6       | 74  | 39668.00 |
| 7       | 102 | 56000.00 |
| 8       | 77  | 43087.50 |
| 9       | 189 | 98482.00 |

```

chi-squared = 5.937 with 8 d.f.
probability = 0.6543

chi-squared with ties = 7.884 with 8 d.f.
probability = 0.4449

```

Dunn's Pairwise Comparison of iq4 by iregion



(No adjustment)

| Col Mean-<br>Row Mean | 1                   | 2                  | 3                   | 4                   | 5                   | 6                   |
|-----------------------|---------------------|--------------------|---------------------|---------------------|---------------------|---------------------|
| 2                     | -1.399868<br>0.0808 |                    |                     |                     |                     |                     |
| 3                     | -0.389159<br>0.3486 | 1.526466<br>0.0634 |                     |                     |                     |                     |
| 4                     | 0.301407<br>0.3816  | 1.897289<br>0.0289 | 0.824575<br>0.2048  |                     |                     |                     |
| 5                     | 0.039361<br>0.4843  | 2.142444<br>0.0161 | 0.685502<br>0.2465  | -0.354599<br>0.3614 |                     |                     |
| 6                     | -0.557758<br>0.2885 | 0.924573<br>0.1776 | -0.296550<br>0.3834 | -0.936798<br>0.1744 | -0.809347<br>0.2092 |                     |
| 7                     | -0.867458<br>0.1928 | 0.650583<br>0.2577 | -0.729396<br>0.2329 | -1.300823<br>0.0967 | -1.304961<br>0.0960 | -0.320211<br>0.3744 |
| 8                     | -1.041294<br>0.1489 | 0.325541<br>0.3724 | -0.957487<br>0.1692 | -1.460253<br>0.0721 | -1.480649<br>0.0694 | -0.544963<br>0.2929 |
| 9                     | -0.291544<br>0.3853 | 1.661935<br>0.0483 | 0.154551<br>0.4386  | -0.716903<br>0.2367 | -0.528838<br>0.2985 | 0.412115<br>0.3401  |
| Col Mean-<br>Row Mean | 7                   | 8                  |                     |                     |                     |                     |
| 8                     | -0.263754<br>0.3960 |                    |                     |                     |                     |                     |
| 9                     | 0.857955<br>0.1955  | 1.074198<br>0.1414 |                     |                     |                     |                     |

alpha = 0.05  
Reject Ho if  $p = P(Z \leq |z|) \leq \alpha/2$

. dunnstest iq5, by(iregion)

Warning: by() values are unlabeled, option nolabel implicit

Kruskal-Wallis equality-of-populations rank test

| iregion | Obs | Rank Sum |
|---------|-----|----------|
| 1       | 47  | 25000.00 |
| 2       | 123 | 70157.00 |
| 3       | 190 | 97806.00 |
| 4       | 60  | 31315.00 |
| 5       | 196 | 99921.50 |
| 6       | 74  | 41475.00 |
| 7       | 102 | 54597.00 |
| 8       | 77  | 40836.00 |
| 9       | 189 | 99103.50 |

chi-squared = 4.348 with 8 d.f.  
probability = 0.8244

chi-squared with ties = 6.456 with 8 d.f.  
probability = 0.5962

Dunn's Pairwise Comparison of iq5 by iregion  
(No adjustment)

| Col Mean-<br>Row Mean | 1                   | 2                  | 3 | 4 | 5 | 6 |
|-----------------------|---------------------|--------------------|---|---|---|---|
| 2                     | -0.894537<br>0.1855 |                    |   |   |   |   |
| 3                     | 0.419717<br>0.3373  | 1.916327<br>0.0277 |   |   |   |   |

```

4 | 0.204685 1.227342 -0.192492
  | 0.4189 0.1098 0.4237
5 | 0.542899 2.100075 0.194468 0.327393
  | 0.2936 0.0179 0.4229 0.3717
6 | -0.610565 0.268597 -1.330089 -0.885045 -1.480943
  | 0.2707 0.3941 0.0917 0.1881 0.0693
7 | -0.075772 1.045718 -0.665873 -0.327165 -0.831627 0.658314
  | 0.4698 0.1478 0.2527 0.3718 0.2028 0.2552
8 | 0.033979 1.098894 -0.459584 -0.195009 -0.608833 0.738209
  | 0.4864 0.1359 0.3229 0.4227 0.2713 0.2302
9 | 0.184904 1.584274 -0.372203 -0.065677 -0.569284 1.050261
  | 0.4267 0.0566 0.3549 0.4738 0.2846 0.1468
Col Mean-|
Row Mean | 7 8
-----+-----
8 | 0.130148
  | 0.4482
9 | 0.354032 0.176403
  | 0.3617 0.4300

```

```

alpha = 0.05
Reject Ho if p = P(Z <= |z|) <= alpha/2

```

```
. dunnstest iq6, by(iregion)
```

```
Warning: by() values are unlabeled, option nolabel implicit
```

```
Kruskal-Wallis equality-of-populations rank test
```

```

+-----+
| iregion | Obs | Rank Sum |
+-----+
| 1 | 47 | 24290.50 |
| 2 | 123 | 67846.50 |
| 3 | 190 | 101167.00 |
| 4 | 60 | 31261.00 |
| 5 | 196 | 103413.00 |
+-----+
| 6 | 74 | 36430.00 |
| 7 | 102 | 52408.00 |
| 8 | 77 | 40753.50 |
| 9 | 189 | 102641.50 |
+-----+

```

```

chi-squared = 2.535 with 8 d.f.
probability = 0.9601

```

```

chi-squared with ties = 3.778 with 8 d.f.
probability = 0.8766

```

```
Dunn's Pairwise Comparison of iq6 by iregion
(No adjustment)
```

```

Col Mean-|
Row Mean | 1 2 3 4 5 6
-----+-----
2 | -0.810245
  | 0.2089
3 | -0.383515 0.660725
  | 0.3507 0.2544
4 | -0.086090 0.775858 0.308663
  | 0.4657 0.2189 0.3788
5 | -0.265616 0.832852 0.189948 -0.178732
  | 0.3953 0.2025 0.4247 0.4291
6 | 0.525236 1.610354 1.170901 0.660455 1.034219
  | 0.2997 0.0537 0.1208 0.2545 0.1505

```

```

7 | 0.068329 1.127482 0.607136 0.177112 0.452013 -0.562680
  | 0.4728 0.1298 0.2719 0.4297 0.3256 0.2868
8 | -0.268646 0.613941 0.094387 -0.191391 -0.048979 -0.907275
  | 0.3941 0.2696 0.4624 0.4241 0.4805 0.1821
9 | -0.643588 0.293845 -0.412947 -0.594761 -0.605829 -1.479401
  | 0.2599 0.3844 0.3398 0.2760 0.2723 0.0695
Col Mean-|
Row Mean | 7 8
-----|-----
8 | -0.409188
  | 0.3412
9 | -0.951871 -0.408107
  | 0.1706 0.3416

```

```

alpha = 0.05
Reject Ho if p = P(Z <= |z|) <= alpha/2

```

```
. dunnstest iq7, by(iregion)
```

```
Warning: by() values are unlabeled, option nolabel implicit
```

```
Kruskal-Wallis equality-of-populations rank test
```

```

+-----+
| iregion | Obs | Rank Sum |
+-----+
| 1 | 47 | 25775.50 |
| 2 | 123 | 69441.50 |
| 3 | 190 | 96261.50 |
| 4 | 60 | 29885.00 |
| 5 | 196 | 104560.50 |
+-----+
| 6 | 74 | 36689.50 |
| 7 | 102 | 55909.00 |
| 8 | 77 | 41935.00 |
| 9 | 189 | 99753.50 |
+-----+

```

```

chi-squared = 5.004 with 8 d.f.
probability = 0.7572

```

```

chi-squared with ties = 6.168 with 8 d.f.
probability = 0.6284

```

```
Dunn's Pairwise Comparison of iq7 by iregion
(No adjustment)
```

```

Col Mean-|
Row Mean | 1 2 3 4 5 6
-----|-----
2 | -0.342213
  | 0.3661
3 | 0.931783 1.818737
  | 0.1757 0.0345
4 | 0.938892 1.534078 0.209944
  | 0.1739 0.0625 0.4169
5 | 0.334313 0.982182 -0.957666 -0.871545
  | 0.3691 0.1630 0.1691 0.1917
6 | 1.024920 1.698322 0.287329 0.047674 1.003173
  | 0.1527 0.0447 0.3869 0.4810 0.1579
7 | 0.005924 0.446007 -1.228147 -1.117670 -0.436178 -1.245082
  | 0.4976 0.3278 0.1097 0.1319 0.3314 0.1066
8 | 0.074683 0.498964 -1.021316 -0.981768 -0.300926 -1.089410
  | 0.4702 0.3089 0.1536 0.1631 0.3817 0.1380
9 | 0.459648 1.153261 -0.748309 -0.728610 0.202295 -0.847727
  | 0.3229 0.1244 0.2271 0.2331 0.4198 0.1983

```

```

Col Mean-|
Row Mean |          7          8
-----+-----+-----
      8 |  0.084653
        |  0.4663
        |
      9 |  0.601297  0.451909
        |  0.2738   0.3257

```

```

alpha = 0.05
Reject Ho if p = P(Z <= |z|) <= alpha/2

```

```

.
. dunnstest iq8, by(iregion)

```

Warning: by() values are unlabeled, option nolabel implicit

Kruskal-Wallis equality-of-populations rank test

```

+-----+-----+
| iregion | Obs | Rank Sum |
+-----+-----+
|      1 |  47 | 24173.50 |
|      2 | 123 | 63543.50 |
|      3 | 190 | 99851.00 |
|      4 |  60 | 30860.50 |
|      5 | 196 | 106283.50 |
+-----+-----+
|      6 |  74 | 37277.50 |
|      7 | 102 | 58555.00 |
|      8 |  77 | 38886.50 |
|      9 | 189 | 100780.00 |
+-----+-----+

```

```

chi-squared = 4.074 with 8 d.f.
probability = 0.8504

```

```

chi-squared with ties = 4.516 with 8 d.f.
probability = 0.8078

```

Dunn's Pairwise Comparison of iq8 by iregion  
(No adjustment)

```

Col Mean-|
Row Mean |          1          2          3          4          5          6
-----+-----+-----+-----+-----+-----+
      2 | -0.045892
        |  0.4817
        |
      3 | -0.236920 -0.265506
        |  0.4064   0.3953
        |
      4 | -0.000210  0.049717  0.260358
        |  0.4999   0.4802   0.3973
        |
      5 | -0.592588 -0.768275 -0.566239 -0.652046
        |  0.2767   0.2212   0.2856   0.2572
        |
      6 |  0.195439  0.301278  0.547699  0.210071  0.972587
        |  0.4225   0.3816   0.2919   0.4168   0.1654
        |
      7 | -1.167548 -1.478256 -1.362451 -1.264884 -0.897613 -1.586690
        |  0.1215   0.0697   0.0865   0.1030   0.1847   0.0563
        |
      8 |  0.173304  0.274910  0.523165  0.186526  0.954118 -0.026870
        |  0.4312   0.3917   0.3004   0.4260   0.1700   0.4893
        |
      9 | -0.399480 -0.494122 -0.258114 -0.439142  0.305373 -0.740665
        |  0.3448   0.3106   0.3982   0.3303   0.3800   0.2294
Col Mean-|
Row Mean |          7          8
-----+-----+-----
      8 |  1.575938
        |  0.0575
        |
      9 |  1.145365 -0.718903
        |  0.1260   0.2361

```

```
alpha = 0.05
Reject Ho if p = P(Z <= |z|) <= alpha/2
```

```
. dunnstest iq9, by(iregion)
```

Warning: by() values are unlabeled, option nolabel implicit

Kruskal-Wallis equality-of-populations rank test

| iregion | Obs | Rank Sum  |
|---------|-----|-----------|
| 1       | 47  | 20677.00  |
| 2       | 123 | 72186.50  |
| 3       | 190 | 102587.00 |
| 4       | 60  | 28965.00  |
| 5       | 196 | 99733.50  |
| 6       | 74  | 42108.50  |
| 7       | 102 | 55248.00  |
| 8       | 77  | 42429.00  |
| 9       | 189 | 96276.50  |

```
chi-squared = 13.497 with 8 d.f.
probability = 0.0958
```

```
chi-squared with ties = 15.670 with 8 d.f.
probability = 0.0473
```

Dunn's Pairwise Comparison of iq9 by iregion  
(No adjustment)

| Col Mean-<br>Row Mean | 1                   | 2                  | 3                   | 4                   | 5                   | 6                  |
|-----------------------|---------------------|--------------------|---------------------|---------------------|---------------------|--------------------|
| 2                     | -3.021716<br>0.0013 |                    |                     |                     |                     |                    |
| 3                     | -2.164465<br>0.0152 | 1.430595<br>0.0763 |                     |                     |                     |                    |
| 4                     | -0.775061<br>0.2192 | 2.331881<br>0.0099 | 1.361625<br>0.0867  |                     |                     |                    |
| 5                     | -1.496111<br>0.0673 | 2.392263<br>0.0084 | 1.076742<br>0.1408  | -0.623663<br>0.2664 |                     |                    |
| 6                     | -2.440672<br>0.0073 | 0.427811<br>0.3344 | -0.748920<br>0.2270 | -1.751408<br>0.0399 | -1.555611<br>0.0599 |                    |
| 7                     | -2.034428<br>0.0210 | 1.191120<br>0.1168 | -0.049282<br>0.4803 | -1.276529<br>0.1009 | -0.947432<br>0.1717 | 0.632439<br>0.2635 |
| 8                     | -2.116297<br>0.0172 | 0.870093<br>0.1921 | -0.289594<br>0.3861 | -1.398130<br>0.0810 | -1.105946<br>0.1344 | 0.390079<br>0.3482 |
| 9                     | -1.502790<br>0.0664 | 2.358466<br>0.0092 | 1.048006<br>0.1473  | -0.634183<br>0.2630 | -0.019200<br>0.4923 | 1.533501<br>0.0626 |
| 8                     | -0.219074<br>0.4133 |                    |                     |                     |                     |                    |
| 9                     | 0.925552<br>0.1773  | 1.085736<br>0.1388 |                     |                     |                     |                    |

```
alpha = 0.05
Reject Ho if p = P(Z <= |z|) <= alpha/2
```

```
. dunnstest iq10, by(iregion)
```

Warning: by() values are unlabeled, option nolabel implicit

Kruskal-Wallis equality-of-populations rank test

```

+-----+
| iregion | Obs | Rank Sum |
+-----+
| 1 | 47 | 24342.50 |
| 2 | 123 | 68159.50 |
| 3 | 190 | 103335.00 |
| 4 | 60 | 29614.00 |
| 5 | 196 | 100986.00 |
+-----+
| 6 | 74 | 36223.00 |
| 7 | 102 | 54254.00 |
| 8 | 77 | 40915.50 |
| 9 | 189 | 102381.50 |
+-----+

```

chi-squared = 4.123 with 8 d.f.  
probability = 0.8458

chi-squared with ties = 7.555 with 8 d.f.  
probability = 0.4781

Dunn's Pairwise Comparison of iq10 by iregion  
(No adjustment)

```

Col Mean-|
Row Mean |          1          2          3          4          5          6
+-----+
 2 | -0.935595
   | 0.1747
 3 | -0.705458  0.393271
   | 0.2403  0.3471
 4 | 0.553976  1.704126  1.504759
   | 0.2898  0.0442  0.0662
 5 | 0.073394  1.498376  1.245921 -0.650586
   | 0.4707  0.0670  0.1064  0.2577
 6 | 0.675122  1.946495  1.757676  0.103700  0.835569
   | 0.2498  0.0258  0.0394  0.4587  0.2017
 7 | -0.351199  0.735705  0.431870 -1.043803 -0.604764 -1.230118
   | 0.3627  0.2310  0.3329  0.1483  0.2727  0.1093
 8 | -0.321760  0.694206  0.409844 -0.972509 -0.531464 -1.139406
   | 0.3738  0.2438  0.3410  0.1654  0.2975  0.1273
 9 | -0.646183  0.475741  0.093459 -1.439010 -1.150070 -1.686357
   | 0.2591  0.3171  0.4628  0.0751  0.1251  0.0459
Col Mean-|
Row Mean |          7          8
+-----+
 8 | 0.015606
   | 0.4938
 9 | -0.353323 -0.338514
   | 0.3619  0.3675

```

alpha = 0.05  
Reject Ho if p = P(Z <= |z|) <= alpha/2

- Question – For each of the questions, 1-10, are there differences in the average response among the devices used?

```
. dunnstest iq1, by(idevice) ma(bh) wrap
```

Warning: by() values are unlabeled, option nolabel implicit

Kruskal-Wallis equality-of-populations rank test

```

+-----+

```

```

+-----+
| idevice | Obs | Rank Sum |
+-----+
| 1 | 455 | 235385.00 |
| 2 | 464 | 243130.00 |
| 4 | 117 | 72496.00 |
| 5 | 22 | 13796.00 |
| 6 | 9 | 4971.00 |
+-----+

```

chi-squared = 12.894 with 4 d.f.  
probability = 0.0118

chi-squared with ties = 22.109 with 4 d.f.  
probability = 0.0002

Dunn's Pairwise Comparison of iq1 by idevice  
(Benjamini-Hochberg)

| Col Mean-<br>Row Mean | 1                   | 2                   | 4                   | 5                  |
|-----------------------|---------------------|---------------------|---------------------|--------------------|
| 2                     | -0.428773<br>0.4176 |                     |                     |                    |
| 4                     | -4.193416<br>0.0001 | -3.928305<br>0.0002 |                     |                    |
| 5                     | -2.136598<br>0.0544 | -2.007905<br>0.0558 | -0.136539<br>0.4457 |                    |
| 6                     | -0.441873<br>0.4704 | -0.357900<br>0.4002 | 0.826607<br>0.4085  | 0.802829<br>0.3517 |

False Discovery Rate = 0.05  
Reject Ho if  $p = P(Z \leq |z|) \leq \text{FDR}/2$  with stopping rule

```
. dunnstest iq2, by(idevice) ma(bh) wrap
```

Warning: by() values are unlabeled, option nolabel implicit

Kruskal-Wallis equality-of-populations rank test

```

+-----+
| idevice | Obs | Rank Sum |
+-----+
| 1 | 455 | 238731.50 |
| 2 | 464 | 243803.00 |
| 4 | 117 | 69497.50 |
| 5 | 22 | 13042.00 |
| 6 | 9 | 4704.00 |
+-----+

```

chi-squared = 6.023 with 4 d.f.  
probability = 0.1975

chi-squared with ties = 8.683 with 4 d.f.  
probability = 0.0695

Dunn's Pairwise Comparison of iq2 by idevice  
(Benjamini-Hochberg)

| Col Mean-<br>Row Mean | 1                   | 2                   | 4                  | 5                  |
|-----------------------|---------------------|---------------------|--------------------|--------------------|
| 2                     | -0.044463<br>0.6890 |                     |                    |                    |
| 4                     | -2.605346<br>0.0459 | -2.582173<br>0.0245 |                    |                    |
| 5                     | -1.216133<br>0.3732 | -1.203232<br>0.2861 | 0.019744<br>0.4921 |                    |
| 6                     | 0.023358<br>0.5452  | 0.032079<br>0.6090  | 0.803447<br>0.4217 | 0.690797<br>0.4081 |

False Discovery Rate = 0.05

Reject Ho if  $p = P(Z \leq |z|) \leq \text{FDR}/2$  with stopping rule

```
. dunnstest iq3, by(idevice) ma(bh) wrap
```

Warning: by() values are unlabeled, option nolabel implicit

Kruskal-Wallis equality-of-populations rank test

```
+-----+
| idevice | Obs | Rank Sum |
+-----+
|       1 | 455 | 231099.50 |
|       2 | 464 | 249881.00 |
|       4 | 117 | 70070.00  |
|       5 | 22  | 13920.00  |
|       6 | 9   | 4807.50   |
+-----+
```

chi-squared = 10.808 with 4 d.f.  
probability = 0.0288

chi-squared with ties = 20.278 with 4 d.f.  
probability = 0.0004

Dunn's Pairwise Comparison of iq3 by idevice  
(Benjamini-Hochberg)

| Col Mean- | 1         | 2         | 4         | 5        |
|-----------|-----------|-----------|-----------|----------|
| Row Mean  |           |           |           |          |
| 2         | -2.063320 |           |           |          |
|           | 0.0489    |           |           |          |
| 4         | -3.901314 | -2.593174 |           |          |
|           | 0.0005    | 0.0238    |           |          |
| 5         | -2.541578 | -1.918820 | -0.647263 |          |
|           | 0.0184    | 0.0550    | 0.3234    |          |
| 6         | -0.346709 | 0.057717  | 0.831681  | 1.107209 |
|           | 0.4049    | 0.4770    | 0.2897    | 0.2235   |

False Discovery Rate = 0.05  
Reject Ho if  $p = P(Z \leq |z|) \leq \text{FDR}/2$  with stopping rule

```
. dunnstest iq4, by(idevice) ma(bh) wrap
```

Warning: by() values are unlabeled, option nolabel implicit

Kruskal-Wallis equality-of-populations rank test

```
+-----+
| idevice | Obs | Rank Sum |
+-----+
|       1 | 455 | 233917.50 |
|       2 | 464 | 245190.00 |
|       4 | 117 | 71356.50  |
|       5 | 22  | 13558.00  |
|       6 | 9   | 5756.00   |
+-----+
```

chi-squared = 11.767 with 4 d.f.  
probability = 0.0192

chi-squared with ties = 15.571 with 4 d.f.  
probability = 0.0037

Dunn's Pairwise Comparison of iq4 by idevice  
(Benjamini-Hochberg)

| Col Mean- | 1         | 2 | 4 | 5 |
|-----------|-----------|---|---|---|
| Row Mean  |           |   |   |   |
| 2         | -0.810343 |   |   |   |
|           | 0.2984    |   |   |   |



```

4 | -3.449252 -2.939310
   | 0.0028    0.0082
5 | -1.747119 -1.502874 -0.102617
   | 0.1344    0.1661    0.4591
6 | -1.391205 -1.232608 -0.320191 -0.219652
   | 0.1642    0.1814    0.4680    0.4590

```

False Discovery Rate = 0.05  
 Reject Ho if  $p = P(Z \leq |z|) \leq \text{FDR}/2$  with stopping rule

```
. dunnstest iq5, by(idevice) ma(bh) wrap
```

Warning: by() values are unlabeled, option nolabel implicit

Kruskal-Wallis equality-of-populations rank test

```

+-----+
| idevice | Obs | Rank Sum |
+-----+
| 1 | 455 | 233689.00 |
| 2 | 464 | 246682.00 |
| 4 | 117 | 72399.00 |
| 5 | 22 | 13029.00 |
| 6 | 9 | 3979.00 |
+-----+

```

chi-squared = 12.465 with 4 d.f.  
 probability = 0.0142

chi-squared with ties = 18.400 with 4 d.f.  
 probability = 0.0010

Dunn's Pairwise Comparison of iq5 by idevice  
 (Benjamini-Hochberg)

```

Col Mean-|
Row Mean |      1      2      4      5
+-----+
2 | -1.078030
   | 0.2007
4 | -4.001036 -3.321473
   | 0.0003    0.0022
5 | -1.420055 -1.094722 0.450750
   | 0.1556    0.2280    0.3261
6 | 0.837348 1.048842 2.013779 1.495773
   | 0.2236    0.1839    0.0734    0.1684

```

False Discovery Rate = 0.05  
 Reject Ho if  $p = P(Z \leq |z|) \leq \text{FDR}/2$  with stopping rule

```
. dunnstest iq6, by(idevice) ma(bh) wrap
```

Warning: by() values are unlabeled, option nolabel implicit

Kruskal-Wallis equality-of-populations rank test

```

+-----+
| idevice | Obs | Rank Sum |
+-----+
| 1 | 455 | 232150.00 |
| 2 | 464 | 249498.50 |
| 4 | 117 | 70802.00 |
| 5 | 22 | 12735.50 |
| 6 | 9 | 4592.00 |
+-----+

```

chi-squared = 9.534 with 4 d.f.  
 probability = 0.0491

chi-squared with ties = 14.174 with 4 d.f.  
probability = 0.0068

Dunn's Pairwise Comparison of iq6 by idevice  
(Benjamini-Hochberg)

| Col Mean-<br>Row Mean | 1                   | 2                   | 4                  | 5                  |
|-----------------------|---------------------|---------------------|--------------------|--------------------|
| 2                     | -1.648801<br>0.1653 |                     |                    |                    |
| 4                     | -3.623520<br>0.0015 | -2.579191<br>0.0248 |                    |                    |
| 5                     | -1.244659<br>0.2666 | -0.746660<br>0.3794 | 0.447117<br>0.4092 |                    |
| 6                     | -0.000029<br>0.5000 | 0.323201<br>0.4147  | 1.085795<br>0.2776 | 0.686639<br>0.3516 |

False Discovery Rate = 0.05  
Reject Ho if  $p = P(Z \leq |z|) \leq \text{FDR}/2$  with stopping rule

. dunnstest iq7, by(idevice) ma(bh) wrap

Warning: by() values are unlabeled, option nolabel implicit

Kruskal-Wallis equality-of-populations rank test

| idevice | Obs | Rank Sum  |
|---------|-----|-----------|
| 1       | 455 | 241171.00 |
| 2       | 464 | 241784.00 |
| 4       | 117 | 70870.00  |
| 5       | 22  | 12133.00  |
| 6       | 9   | 3820.00   |

chi-squared = 8.437 with 4 d.f.  
probability = 0.0768

chi-squared with ties = 10.374 with 4 d.f.  
probability = 0.0346

Dunn's Pairwise Comparison of iq7 by idevice  
(Benjamini-Hochberg)

| Col Mean-<br>Row Mean | 1                   | 2                   | 4                  | 5                  |
|-----------------------|---------------------|---------------------|--------------------|--------------------|
| 2                     | 0.488676<br>0.3473  |                     |                    |                    |
| 4                     | -2.627194<br>0.0215 | -2.944079<br>0.0162 |                    |                    |
| 5                     | -0.353648<br>0.3618 | -0.501570<br>0.3850 | 0.839686<br>0.2865 |                    |
| 6                     | 1.128879<br>0.2589  | 1.033292<br>0.2512  | 1.885785<br>0.0989 | 1.155457<br>0.3099 |

False Discovery Rate = 0.05  
Reject Ho if  $p = P(Z \leq |z|) \leq \text{FDR}/2$  with stopping rule

. dunnstest iq8, by(idevice) ma(bh) wrap

Warning: by() values are unlabeled, option nolabel implicit

Kruskal-Wallis equality-of-populations rank test

| idevice | Obs | Rank Sum |
|---------|-----|----------|
|---------|-----|----------|

```

+-----+
| 1 | 455 | 236191.50 |
| 2 | 464 | 255170.50 |
| 4 | 117 | 60562.50 |
| 5 | 22 | 13139.50 |
| 6 | 9 | 4714.00 |
+-----+

```

chi-squared = 3.571 with 4 d.f.  
probability = 0.4671

chi-squared with ties = 3.957 with 4 d.f.  
probability = 0.4119

Dunn's Pairwise Comparison of iq8 by idevice  
(Benjamini-Hochberg)

| Col Mean-<br>Row Mean | 1                   | 2                   | 4                   | 5                  |
|-----------------------|---------------------|---------------------|---------------------|--------------------|
| 2                     | -1.596325<br>0.5521 |                     |                     |                    |
| 4                     | 0.048571<br>0.5340  | 1.066739<br>0.3576  |                     |                    |
| 5                     | -1.222802<br>0.5535 | -0.740661<br>0.4589 | -1.170335<br>0.4031 |                    |
| 6                     | -0.047444<br>0.4811 | 0.265489<br>0.5647  | -0.060723<br>0.5947 | 0.634244<br>0.4383 |

False Discovery Rate = 0.05  
Reject Ho if  $p = P(Z \leq |z|) \leq \text{FDR}/2$  with stopping rule

```
. dunnstest iq9, by(idevice) ma(bh) wrap
```

Warning: by() values are unlabeled, option nolabel implicit

Kruskal-Wallis equality-of-populations rank test

```

+-----+
| idevice | Obs | Rank Sum |
+-----+
| 1 | 455 | 233402.00 |
| 2 | 464 | 251754.00 |
| 4 | 117 | 69053.00 |
| 5 | 22 | 11048.00 |
| 6 | 9 | 4521.00 |
+-----+

```

chi-squared = 6.698 with 4 d.f.  
probability = 0.1527

chi-squared with ties = 7.761 with 4 d.f.  
probability = 0.1007

Dunn's Pairwise Comparison of iq9 by idevice  
(Benjamini-Hochberg)

| Col Mean-<br>Row Mean | 1                   | 2                   | 4                  | 5                   |
|-----------------------|---------------------|---------------------|--------------------|---------------------|
| 2                     | -1.567210<br>0.1951 |                     |                    |                     |
| 4                     | -2.602321<br>0.0463 | -1.607996<br>0.2696 |                    |                     |
| 5                     | 0.172649<br>0.5393  | 0.646611<br>0.4316  | 1.322982<br>0.2323 |                     |
| 6                     | 0.110391<br>0.5067  | 0.417646<br>0.4830  | 0.887233<br>0.3750 | -0.001338<br>0.4995 |

False Discovery Rate = 0.05  
Reject Ho if  $p = P(Z \leq |z|) \leq \text{FDR}/2$  with stopping rule

```
. dunntest iq10, by(idevice) ma(bh) wrap
Warning: by() values are unlabeled, option nolabel implicit
```

Kruskal-Wallis equality-of-populations rank test

```
+-----+
| idevice | Obs | Rank Sum |
+-----+-----+
|         |     |           |
|         1 | 455 | 230212.00 |
|         2 | 464 | 251454.50 |
|         4 | 117 | 70292.50  |
|         5 | 22  | 13460.00  |
|         6 | 9   | 4359.00   |
+-----+-----+
```

```
chi-squared = 11.207 with 4 d.f.
probability = 0.0243
```

```
chi-squared with ties = 20.357 with 4 d.f.
probability = 0.0004
```

Dunn's Pairwise Comparison of iq10 by idevice  
(Benjamini-Hochberg)

```
Col Mean-|
Row Mean |         1         2         4         5
+-----+-----+
2 | -2.384264
  | 0.0285
4 | -4.001160 -2.488534
  | 0.0003 0.0321
5 | -2.120896 -1.400904 -0.207547
  | 0.0424 0.1152 0.4178
6 | 0.280999 0.748461 1.472429 1.409124
  | 0.4326 0.2839 0.1409 0.1323
```

```
False Discovery Rate = 0.05
Reject Ho if p = P(Z <= |z|) <= FDR/2 with stopping rule
```
