# Supplementary material for: Informed consent, shared-decision making and a reasonable patient’s wishes based on a cross-sectional, national survey in the USA using a hypothetical scenario
Source: PubMed Central journal article supplement — BMJ Open. 2019 Jul 30;9(7):e028957. doi: 10.1136/bmjopen-2019-028957 (PMC6678025; doi:10.1136/bmjopen-2019-028957), 2019-07-30
Supplement: bmjopen-2019-028957supp010.pdf [file bmjopen-2019-028957supp010.pdf]

## National Survey Statistics on Factor Analysis Produced Variables

- Question – For each of the factor variables (knowledge and other), are there differences in the average response by age?

Answer – YES, there are significant differences among the age categories for both factor variables, and with the exception of group 4 vs group 5 for the factor variable "other" all groups differed significantly from each other.

```
. dunnstest iknowledge, by(iage)
Kruskal-Wallis probability = 0.0001

Dunn's Pairwise Comparison of iknowledge by iage
(No adjustment)

Col Mean-|
Row Mean |      2      3      4
-----|-----
  3 | -3.047089
    | 0.0012
  4 | -6.647864 -3.042354
    | 0.0000 0.0012
  5 | -8.540506 -5.326895 -2.884203
    | 0.0000 0.0000 0.0020

alpha = 0.05
Reject Ho if p = P(Z <= |z|) <= alpha/2
```

```
. dunnstest iother, by(iage)
Kruskal-Wallis probability = 0.0001

Dunn's Pairwise Comparison of iother by iage
(No adjustment)

Col Mean-|
Row Mean |      2      3      4
-----|-----
  3 | -3.687658
    | 0.0001
  4 | -6.409482 -2.160471
    | 0.0000 0.0154
  5 | -5.995882 -2.338749 -0.480036
    | 0.0000 0.0097 0.3156
```

- Question – For each of the factor variables (knowledge and other), are there differences in the average response by gender?

Answer – YES, for both factor variables (knowledge and other) the differences in responses of the genders are very highly significantly different (  $p < 0.0001$  )

- Question – For each of the factor variables (knowledge and other), are there differences in the average response by income?

Answer – YES, but only for the factor variable knowledge. Most of the differences among pairs are between group 1 and other groups and between group 3 and other groups.

```
. dunnstest iknowledge, by(iincome)
Kruskal-Wallis probability = 0.0005
```

Dunn's Pairwise Comparison of iknowledge by iincome  
(No adjustment)

| Col Mean-<br>Row Mean | 1                   | 2                   | 3                   | 4                   | 5                   | 6                   |
|-----------------------|---------------------|---------------------|---------------------|---------------------|---------------------|---------------------|
| 2                     | -2.497470<br>0.0063 |                     |                     |                     |                     |                     |
| 3                     | -1.980782<br>0.0238 | 0.879087<br>0.1897  |                     |                     |                     |                     |
| 4                     | -3.815271<br>0.0001 | -1.257535<br>0.1043 | -2.470334<br>0.0067 |                     |                     |                     |
| 5                     | -3.893000<br>0.0000 | -1.495793<br>0.0674 | -2.613509<br>0.0045 | -0.363691<br>0.3580 |                     |                     |
| 6                     | -3.353408<br>0.0004 | -1.183058<br>0.1184 | -2.060025<br>0.0197 | -0.184688<br>0.4267 | 0.114798<br>0.4543  |                     |
| 7                     | -3.552889<br>0.0002 | -1.742852<br>0.0407 | -2.457248<br>0.0070 | -0.959300<br>0.1687 | -0.688698<br>0.2455 | -0.722300<br>0.2351 |
| 8                     | -1.760408<br>0.0392 | -0.130388<br>0.4481 | -0.635829<br>0.2624 | 0.591132<br>0.2772  | 0.774389<br>0.2194  | 0.656758<br>0.2557  |
| 9                     | -2.347848<br>0.0094 | -1.192059<br>0.1166 | -1.563387<br>0.0590 | -0.708333<br>0.2394 | -0.559877<br>0.2878 | -0.597431<br>0.2751 |
| 10                    | -3.169354<br>0.0008 | -1.756891<br>0.0395 | -2.259138<br>0.0119 | -1.163994<br>0.1222 | -0.964239<br>0.1675 | -0.987559<br>0.1617 |
| 11                    | -3.282179<br>0.0005 | -0.905285<br>0.1827 | -1.879430<br>0.0301 | 0.235565<br>0.4069  | 0.541013<br>0.2942  | 0.359674<br>0.3595  |
| Col Mean-<br>Row Mean | 7                   | 8                   | 9                   | 10                  |                     |                     |
| 8                     | 1.160782<br>0.1229  |                     |                     |                     |                     |                     |
| 9                     | -0.140395<br>0.4442 | -0.960591<br>0.1684 |                     |                     |                     |                     |
| 10                    | -0.396438<br>0.3459 | -1.342428<br>0.0897 | -0.168444<br>0.4331 |                     |                     |                     |
| 11                    | 1.061221<br>0.1443  | -0.433697<br>0.3323 | 0.788364<br>0.2152  | 1.244967<br>0.1066  |                     |                     |

alpha = 0.05

Reject Ho if  $p = P(Z \leq |z|) \leq \alpha/2$ 

- Question: For each of the factor variables (knowledge and other), are there differences in the average response among regions?

Answer – NO, for both factor variables, there are no significant differences in responses among regions.

- Question: For each of the factor variables (knowledge and other), are there differences in the average response based upon type of device used?

Answer – YES, for both factor variables there are significant differences in response provided on various devices.

```
. dunnstest iknowledge, by(idevice)
Kruskal-Wallis probability = 0.0002
```

Dunn's Pairwise Comparison of iknowledge by idevice  
(No adjustment)

| Col Mean-<br>Row Mean | 1         | 2 | 4 | 5 |
|-----------------------|-----------|---|---|---|
| 2                     | -0.842399 |   |   |   |

```

      |      0.1998
4 | -4.104772 -3.575691
   | 0.0000 0.0002
5 | -2.253612 -1.999900 -0.286000
   | 0.0121 0.0228 0.3874
6 | -1.116132 -0.951199 0.143918 0.293782
   | 0.1322 0.1708 0.4428 0.3845

```

alpha = 0.05

Reject Ho if p = P(Z <= |z|) <= alpha/2

```
. dunnstest iother, by(idevice)
```

Kruskal-Wallis probability = 0.0423

Dunn's Pairwise Comparison of iother by idevice  
(No adjustment)

| Col Mean-<br>Row Mean | 1                   | 2                   | 4                  | 5                  |
|-----------------------|---------------------|---------------------|--------------------|--------------------|
| 2                     | -1.392887<br>0.0818 |                     |                    |                    |
| 4                     | -3.084003<br>0.0010 | -2.201813<br>0.0138 |                    |                    |
| 5                     | -0.728643<br>0.2331 | -0.307796<br>0.3791 | 0.691191<br>0.2447 |                    |
| 6                     | 0.005101<br>0.4980  | 0.278162<br>0.3904  | 0.929115<br>0.1764 | 0.406324<br>0.3423 |

alpha = 0.05

Reject Ho if p = P(Z <= |z|) <= alpha/2

## STATISTICS

- Question – For each of the factor variables (knowledge and other), are there differences in the average response by age?

```
. dunnstest iknowledge, by(iage)
```

Warning: by() values are unlabeled, option nolabel implicit

Kruskal-Wallis equality-of-populations rank test

| iage | Obs | Rank Sum  |
|------|-----|-----------|
| 2    | 297 | 126497.00 |
| 3    | 230 | 115847.50 |
| 4    | 343 | 198606.00 |
| 5    | 197 | 128827.50 |

chi-squared = 75.931 with 3 d.f.  
probability = 0.0001

chi-squared with ties = 85.400 with 3 d.f.  
probability = 0.0001

Dunn's Pairwise Comparison of iknowledge by iage  
(No adjustment)

| Col Mean-<br>Row Mean | 2                   | 3                   | 4 |
|-----------------------|---------------------|---------------------|---|
| 3                     | -3.047089<br>0.0012 |                     |   |
| 4                     | -6.647864<br>0.0000 | -3.042354<br>0.0012 |   |

```

5 | -8.540506 -5.326895 -2.884203
  | 0.0000 0.0000 0.0020

```

```

alpha = 0.05
Reject Ho if p = P(Z <= |z|) <= alpha/2

```

```
. dunnstest iother, by(iage)
```

```
Warning: by() values are unlabeled, option nolabel implicit
```

```
Kruskal-Wallis equality-of-populations rank test
```

```

+-----+
| iage | Obs | Rank Sum |
+-----+-----+
| 2 | 297 | 128210.00 |
| 3 | 230 | 122050.50 |
| 4 | 343 | 201312.00 |
| 5 | 197 | 118205.50 |
+-----+

```

```

chi-squared = 51.926 with 3 d.f.
probability = 0.0001

```

```

chi-squared with ties = 52.814 with 3 d.f.
probability = 0.0001

```

```

Dunn's Pairwise Comparison of iother by iage
(No adjustment)

```

```

Col Mean-|
Row Mean |      2      3      4
+-----+-----+
3 | -3.687658
  | 0.0001
  |
4 | -6.409482 -2.160471
  | 0.0000 0.0154
  |
5 | -5.995882 -2.338749 -0.480036
  | 0.0000 0.0097 0.3156

```

```

alpha = 0.05
Reject Ho if p = P(Z <= |z|) <= alpha/2

```

- 
- [Question – For each of the factor variables \(knowledge and other\), are there differences in the average response by gender?](#)

```
. dunnstest iknowledge, by(igender)
```

```
Warning: by() values are unlabeled, option nolabel implicit
```

```
Kruskal-Wallis equality-of-populations rank test
```

```

+-----+
| igender | Obs | Rank Sum |
+-----+-----+
| 1 | 497 | 240985.50 |
| 2 | 570 | 328792.50 |
+-----+

```

```

chi-squared = 23.638 with 1 d.f.
probability = 0.0001

```

```

chi-squared with ties = 26.585 with 1 d.f.
probability = 0.0001

```

```

Dunn's Pairwise Comparison of iknowledge by igender
(No adjustment)

```

```
Col Mean-|
```

```

Row Mean |          1
-----+-----
      2 | -5.156095
      | 0.0000

alpha = 0.05
Reject Ho if p = P(Z <= |z|) <= alpha/2

.
. dunnstest iother, by(igender)

Warning: by() values are unlabeled, option nolabel implicit

Kruskal-Wallis equality-of-populations rank test

+-----+
| igender | Obs | Rank Sum |
+-----+-----+
|         |     |           |
|         1 | 497 | 238686.50 |
|         2 | 570 | 331091.50 |
+-----+-----+

chi-squared = 28.299 with 1 d.f.
probability = 0.0001

chi-squared with ties = 28.783 with 1 d.f.
probability = 0.0001

          Dunn's Pairwise Comparison of iother by igender
          (No adjustment)

Col Mean-|
Row Mean |          1
-----+-----
      2 | -5.365020
      | 0.0000

```

```

alpha = 0.05
Reject Ho if p = P(Z <= |z|) <= alpha/2

```

- 
- [Question – For each of the factor variables \(knowledge and other\), are there differences in the average response by income?](#)

```

. dunnstest iknowledge, by(iincome)

Warning: by() values are unlabeled, option nolabel implicit

```

Kruskal-Wallis equality-of-populations rank test

```

+-----+
| iincome | Obs | Rank Sum |
+-----+-----+
|         |     |           |
|         1 | 85 | 35381.50 |
|         2 | 124 | 64287.00 |
|         3 | 220 | 107747.00 |
|         4 | 194 | 108728.50 |
|         5 | 138 | 78967.00 |
+-----+-----+
|         |     |           |
|         6 | 81 | 45972.00 |
|         7 | 45 | 27296.00 |
|         8 | 29 | 15261.50 |
|         9 | 13 | 8052.50 |
|        10 | 22 | 14004.00 |
+-----+-----+
|        11 | 116 | 64081.00 |
+-----+-----+

```

```

chi-squared = 28.138 with 10 d.f.
probability = 0.0017

```

```

chi-squared with ties = 31.647 with 10 d.f.
probability = 0.0005

```

Dunn's Pairwise Comparison of iknowledge by iincome  
(No adjustment)

| Col Mean-<br>Row Mean |                     | 1                   | 2                   | 3                   | 4                   | 5                   | 6 |
|-----------------------|---------------------|---------------------|---------------------|---------------------|---------------------|---------------------|---|
| 2                     | -2.497470<br>0.0063 |                     |                     |                     |                     |                     |   |
| 3                     | -1.980782<br>0.0238 | 0.879087<br>0.1897  |                     |                     |                     |                     |   |
| 4                     | -3.815271<br>0.0001 | -1.257535<br>0.1043 | -2.470334<br>0.0067 |                     |                     |                     |   |
| 5                     | -3.893000<br>0.0000 | -1.495793<br>0.0674 | -2.613509<br>0.0045 | -0.363691<br>0.3580 |                     |                     |   |
| 6                     | -3.353408<br>0.0004 | -1.183058<br>0.1184 | -2.060025<br>0.0197 | -0.184688<br>0.4267 | 0.114798<br>0.4543  |                     |   |
| 7                     | -3.552889<br>0.0002 | -1.742852<br>0.0407 | -2.457248<br>0.0070 | -0.959300<br>0.1687 | -0.688698<br>0.2455 | -0.722300<br>0.2351 |   |
| 8                     | -1.760408<br>0.0392 | -0.130388<br>0.4481 | -0.635829<br>0.2624 | 0.591132<br>0.2772  | 0.774389<br>0.2194  | 0.656758<br>0.2557  |   |
| 9                     | -2.347848<br>0.0094 | -1.192059<br>0.1166 | -1.563387<br>0.0590 | -0.708333<br>0.2394 | -0.559877<br>0.2878 | -0.597431<br>0.2751 |   |
| 10                    | -3.169354<br>0.0008 | -1.756891<br>0.0395 | -2.259138<br>0.0119 | -1.163994<br>0.1222 | -0.964239<br>0.1675 | -0.987559<br>0.1617 |   |
| 11                    | -3.282179<br>0.0005 | -0.905285<br>0.1827 | -1.879430<br>0.0301 | 0.235565<br>0.4069  | 0.541013<br>0.2942  | 0.359674<br>0.3595  |   |
| Col Mean-<br>Row Mean |                     | 7                   | 8                   | 9                   | 10                  |                     |   |
| 8                     | 1.160782<br>0.1229  |                     |                     |                     |                     |                     |   |
| 9                     | -0.140395<br>0.4442 | -0.960591<br>0.1684 |                     |                     |                     |                     |   |
| 10                    | -0.396438<br>0.3459 | -1.342428<br>0.0897 | -0.168444<br>0.4331 |                     |                     |                     |   |
| 11                    | 1.061221<br>0.1443  | -0.433697<br>0.3323 | 0.788364<br>0.2152  | 1.244967<br>0.1066  |                     |                     |   |

alpha = 0.05  
Reject Ho if  $p = P(Z \leq |z|) \leq \alpha/2$

```
. dunnstest iother, by(iincome)
```

Warning: by() values are unlabeled, option nolabel implicit

Kruskal-Wallis equality-of-populations rank test

| iincome | Obs | Rank Sum  |
|---------|-----|-----------|
| 1       | 85  | 40557.50  |
| 2       | 124 | 68881.50  |
| 3       | 220 | 111152.50 |
| 4       | 194 | 109253.00 |
| 5       | 138 | 76566.00  |
| 6       | 81  | 38956.50  |
| 7       | 45  | 26963.00  |
| 8       | 29  | 15964.00  |
| 9       | 13  | 7397.50   |
| 10      | 22  | 12425.50  |
| 11      | 116 | 61661.00  |

chi-squared = 12.672 with 10 d.f.

```

probability =      0.2426
chi-squared with ties =      12.889 with 10 d.f.
probability =      0.2299

```

```

Dunn's Pairwise Comparison of iother by iincome
(No adjustment)

```

| Col Mean-<br>Row Mean | 1                   | 2                   | 3                   | 4                   | 5                   | 6                   |
|-----------------------|---------------------|---------------------|---------------------|---------------------|---------------------|---------------------|
| 2                     | -1.820902<br>0.0343 |                     |                     |                     |                     |                     |
| 3                     | -0.719869<br>0.2358 | 1.464701<br>0.0715  |                     |                     |                     |                     |
| 4                     | -2.164101<br>0.0152 | -0.218148<br>0.4137 | -1.924668<br>0.0271 |                     |                     |                     |
| 5                     | -1.843770<br>0.0326 | 0.017718<br>0.4929  | -1.494472<br>0.0675 | 0.244915<br>0.4033  |                     |                     |
| 6                     | -0.080037<br>0.4681 | 1.707810<br>0.0438  | 0.611758<br>0.2703  | 2.033932<br>0.0210  | 1.727440<br>0.0420  |                     |
| 7                     | -2.166306<br>0.0151 | -0.821450<br>0.2057 | -1.879091<br>0.0301 | -0.712417<br>0.2381 | -0.845545<br>0.1989 | -2.081181<br>0.0187 |
| 8                     | -1.116035<br>0.1322 | 0.079540<br>0.4683  | -0.749513<br>0.2268 | 0.208387<br>0.4175  | 0.069584<br>0.4723  | -1.051661<br>0.1465 |
| 9                     | -1.009833<br>0.1563 | -0.152029<br>0.4396 | -0.731528<br>0.2322 | -0.067154<br>0.4732 | -0.160323<br>0.4363 | -0.964946<br>0.1673 |
| 10                    | -1.199166<br>0.1152 | -0.131556<br>0.4477 | -0.871672<br>0.1917 | -0.023795<br>0.4905 | -0.142123<br>0.4435 | -1.141432<br>0.1268 |
| 11                    | -1.247245<br>0.1062 | 0.606437<br>0.2721  | -0.750743<br>0.2264 | 0.881120<br>0.1891  | 0.604470<br>0.2728  | -1.144015<br>0.1263 |
| Col Mean-<br>Row Mean | 7                   | 8                   | 9                   | 10                  |                     |                     |
| 8                     | 0.669238<br>0.2517  |                     |                     |                     |                     |                     |
| 9                     | 0.313259<br>0.3770  | -0.181941<br>0.4278 |                     |                     |                     |                     |
| 10                    | 0.432536<br>0.3327  | -0.165674<br>0.4342 | 0.039694<br>0.4842  |                     |                     |                     |
| 11                    | 1.260049<br>0.1038  | 0.298282<br>0.3827  | 0.419363<br>0.3375  | 0.467740<br>0.3200  |                     |                     |

```

alpha = 0.05
Reject Ho if p = P(Z <= |z|) <= alpha/2

```

- Question: For each of the factor variables (knowledge and other), are there differences in the average response among regions?

```
. dunnstest iknowledge, by(iiregion)
```

```
Warning: by() values are unlabeled, option nolabel implicit
```

```
Kruskal-Wallis equality-of-populations rank test
```

```

+-----+
| iiregion | Obs | Rank Sum |
+-----+
| 1 | 47 | 24583.50 |
| 2 | 123 | 70842.50 |
| 3 | 190 | 100915.00 |
| 4 | 60 | 30070.50 |
| 5 | 196 | 98718.00 |

```

```

+-----+
| 6 | 74 | 38057.50 |
| 7 | 102 | 54316.00 |
| 8 | 77 | 42647.50 |
| 9 | 189 | 100060.50 |
+-----+

```

```

chi-squared = 5.469 with 8 d.f.
probability = 0.7065

```

```

chi-squared with ties = 6.162 with 8 d.f.
probability = 0.6291

```

Dunn's Pairwise Comparison of iknowledge by iregion  
(No adjustment)

```

Col Mean-|
Row Mean |          1          2          3          4          5          6
+-----+-----+-----+-----+-----+-----+
 2 | -1.071609
   | 0.1419
 3 | -0.172251  1.345399
   | 0.4316  0.0892
 4 | 0.390149  1.649590  0.702685
   | 0.3482  0.0495  0.2411
 5 | 0.414702  2.183041  0.937194 -0.058582
   | 0.3392  0.0145  0.1743  0.4766
 6 | 0.163190  1.455991  0.426919 -0.262248 -0.270564
   | 0.4352  0.0727  0.3347  0.3966  0.3934
 7 | -0.186328  1.126918 -0.039002 -0.669008 -0.820729 -0.414454
   | 0.4261  0.1299  0.4844  0.2517  0.2059  0.3393
 8 | -0.578186  0.528077 -0.584510 -1.062830 -1.296538 -0.844421
   | 0.2816  0.2987  0.2794  0.1439  0.0974  0.1992
 9 | -0.135699  1.395304  0.057851 -0.662132 -0.877640 -0.383263
   | 0.4460  0.0815  0.4769  0.2539  0.1901  0.3508
Col Mean-|
Row Mean |          7          8
+-----+-----+
 8 | -0.491339
   | 0.3116
 9 | 0.087340  0.628024
   | 0.4652  0.2650

```

```

alpha = 0.05
Reject Ho if p = P(Z <= |z|) <= alpha/2

```

```

. dunnstest iother, by(iregion)

```

```

Warning: by() values are unlabeled, option nolabel implicit

```

Kruskal-Wallis equality-of-populations rank test

```

+-----+
| iregion | Obs | Rank Sum |
+-----+-----+-----+
| 1 | 47 | 22561.50 |
| 2 | 123 | 69595.50 |
| 3 | 190 | 98283.50 |
| 4 | 60 | 29825.50 |
| 5 | 196 | 103603.00 |
+-----+-----+-----+
| 6 | 74 | 38500.50 |
| 7 | 102 | 56208.00 |
| 8 | 77 | 40265.50 |
| 9 | 189 | 101368.00 |
+-----+-----+-----+

```

```

chi-squared = 4.655 with 8 d.f.
probability = 0.7937

```



chi-squared with ties = 4.736 with 8 d.f.  
 probability = 0.7854

Dunn's Pairwise Comparison of iother by iregion  
(No adjustment)

| Col Mean-<br>Row Mean | 1                   | 2                   | 3                   | 4                   | 5                   | 6                   |
|-----------------------|---------------------|---------------------|---------------------|---------------------|---------------------|---------------------|
| 2                     | -1.651264<br>0.0493 |                     |                     |                     |                     |                     |
| 3                     | -0.754747<br>0.2252 | 1.384344<br>0.0831  |                     |                     |                     |                     |
| 4                     | -0.289090<br>0.3863 | 1.440613<br>0.0748  | 0.450033<br>0.3263  |                     |                     |                     |
| 5                     | -0.986810<br>0.1619 | 1.068340<br>0.1427  | -0.366535<br>0.3570 | -0.704618<br>0.2405 |                     |                     |
| 6                     | -0.712218<br>0.2382 | 1.021777<br>0.1534  | -0.072157<br>0.4712 | -0.440535<br>0.3298 | 0.201037<br>0.4203  |                     |
| 7                     | -1.329861<br>0.0918 | 0.363767<br>0.3580  | -0.908316<br>0.1819 | -1.094902<br>0.1368 | -0.607562<br>0.2717 | -0.665397<br>0.2529 |
| 8                     | -0.764952<br>0.2221 | 0.974207<br>0.1650  | -0.137978<br>0.4451 | -0.495255<br>0.3102 | 0.138866<br>0.4448  | -0.053765<br>0.4786 |
| 9                     | -1.140280<br>0.1271 | 0.839921<br>0.2005  | -0.612310<br>0.2702 | -0.874259<br>0.1910 | -0.250994<br>0.4009 | -0.386621<br>0.3495 |
| Col Mean-<br>Row Mean | 7                   | 8                   |                     |                     |                     |                     |
| 8                     | 0.615064<br>0.2693  |                     |                     |                     |                     |                     |
| 9                     | 0.395481<br>0.3462  | -0.327411<br>0.3717 |                     |                     |                     |                     |

alpha = 0.05  
 Reject Ho if  $p = P(Z \leq |z|) \leq \alpha/2$

- Question: For each of the factor variables (knowledge and other), are there differences in the average response based upon type of device used?

```
. dunnstest iknowledge, by(idevice)
```

Warning: by() values are unlabeled, option nolabel implicit

Kruskal-Wallis equality-of-populations rank test

| idevice | Obs | Rank Sum  |
|---------|-----|-----------|
| 1       | 455 | 231846.00 |
| 2       | 464 | 243925.50 |
| 4       | 117 | 74083.00  |
| 5       | 22  | 14355.00  |
| 6       | 9   | 5568.50   |

chi-squared = 19.255 with 4 d.f.  
 probability = 0.0007

chi-squared with ties = 21.656 with 4 d.f.  
 probability = 0.0002

Dunn's Pairwise Comparison of iknowledge by idevice

```

                                (No adjustment)
Col Mean-|
Row Mean |      1      2      4      5
-----|-----
  2 | -0.842399
    |      0.1998
    |
  4 | -4.104772 -3.575691
    |      0.0000      0.0002
    |
  5 | -2.253612 -1.999900 -0.286000
    |      0.0121      0.0228      0.3874
    |
  6 | -1.116132 -0.951199  0.143918  0.293782
    |      0.1322      0.1708      0.4428      0.3845

```

```

alpha = 0.05
Reject Ho if p = P(Z <= |z|) <= alpha/2

```

```

. dunnstest iother, by(idevice)

```

```

Warning: by() values are unlabeled, option nolabel implicit

```

```

Kruskal-Wallis equality-of-populations rank test

```

```

+-----+
| idevice | Obs | Rank Sum |
+-----+
|      1 | 455 | 232086.50 |
|      2 | 464 | 249706.50 |
|      4 | 117 |  71108.00 |
|      5 |  22 | 12291.00 |
|      6 |   9 |   4586.00 |
+-----+

```

```

chi-squared = 9.727 with 4 d.f.
probability = 0.0453

```

```

chi-squared with ties = 9.893 with 4 d.f.
probability = 0.0423

```

```

Dunn's Pairwise Comparison of iother by idevice
(No adjustment)

```

```

Col Mean-|
Row Mean |      1      2      4      5
-----|-----
  2 | -1.392887
    |      0.0818
    |
  4 | -3.084003 -2.201813
    |      0.0010      0.0138
    |
  5 | -0.728643 -0.307796  0.691191
    |      0.2331      0.3791      0.2447
    |
  6 |  0.005101  0.278162  0.929115  0.406324
    |      0.4980      0.3904      0.1764      0.3423

```

```

alpha = 0.05
Reject Ho if p = P(Z <= |z|) <= alpha/2

```
